# Supplementary material for: Exosomal miR-146a-5p and miR-155-5p promote CXCL12/CXCR7-induced metastasis of colorectal cancer by crosstalk with cancer-associated fibroblasts
Source: PubMed Central journal article supplement (PMC9021302; doi:10.1038/s41419-022-04825-6), 2022-04-20

Figure 2E

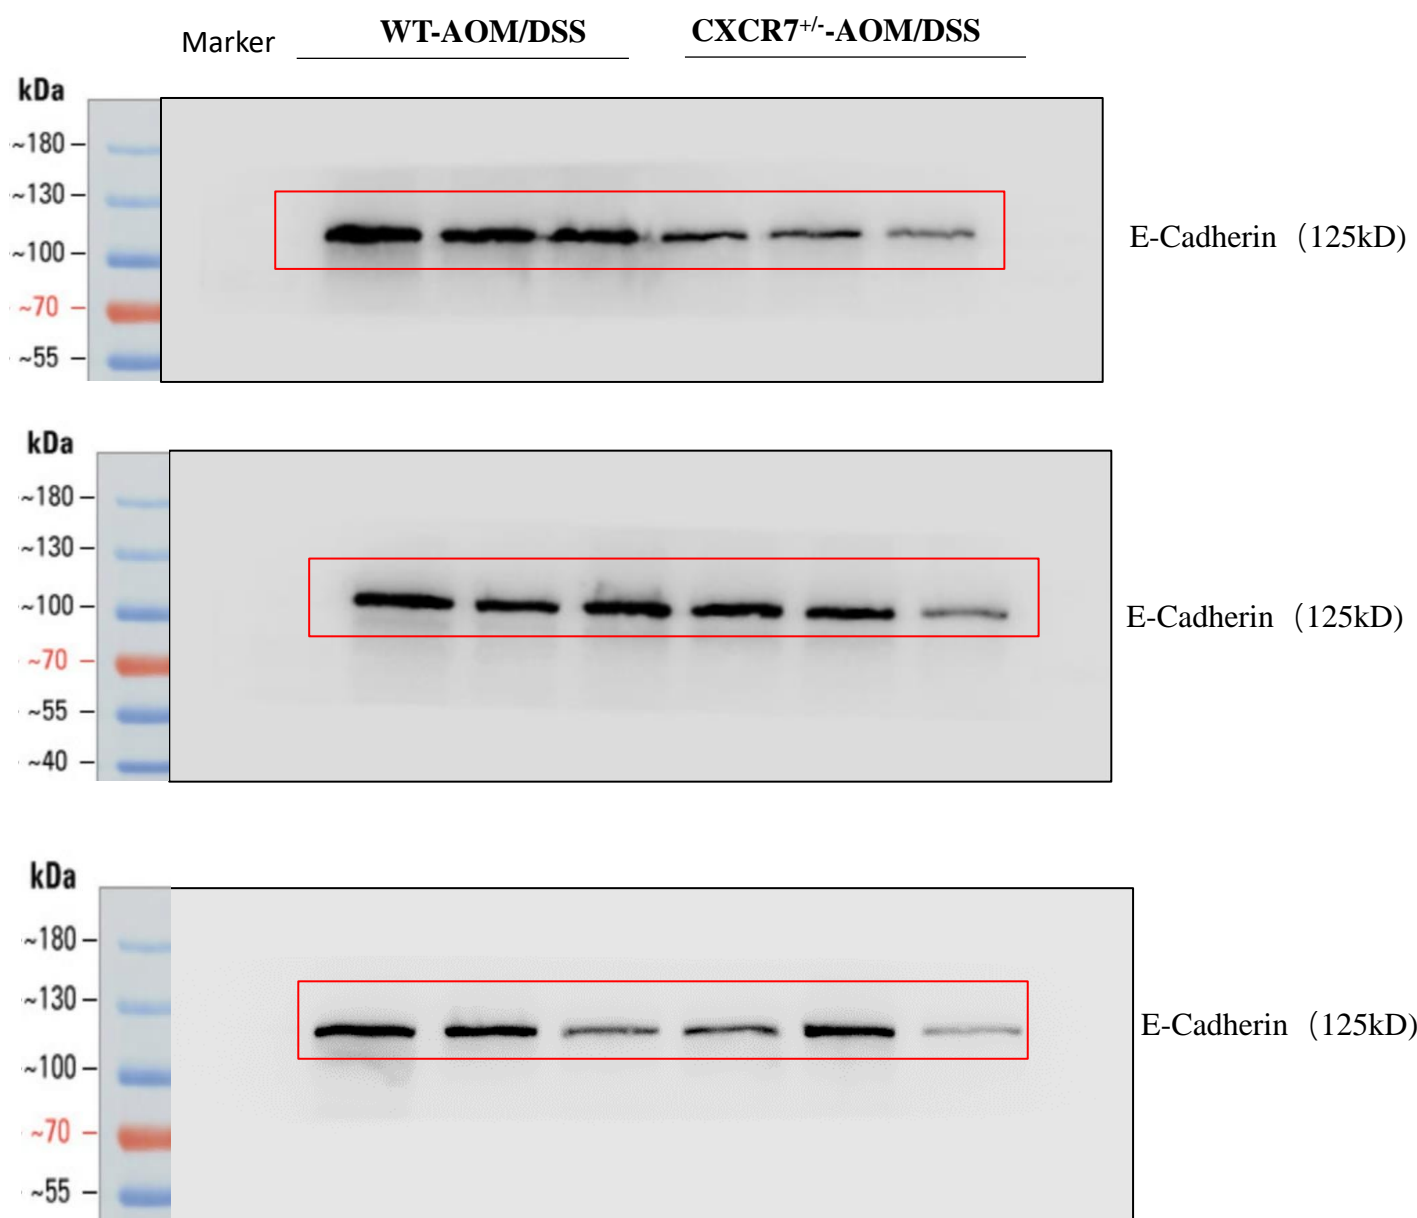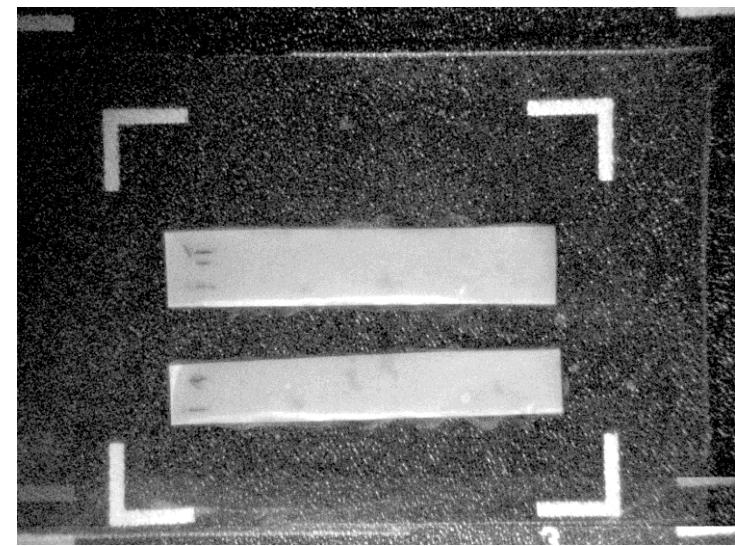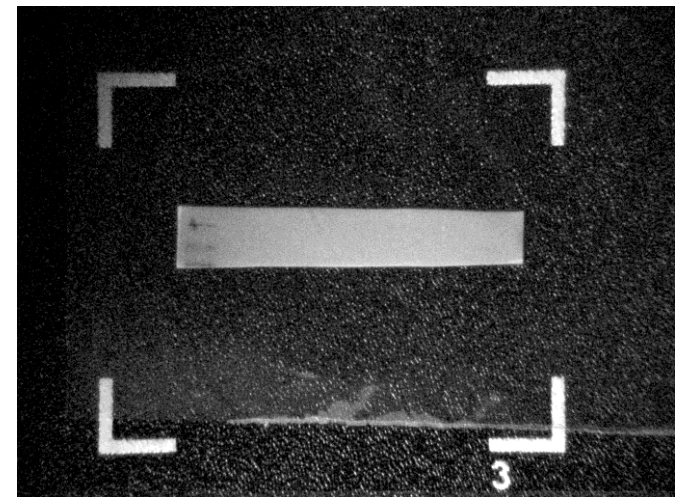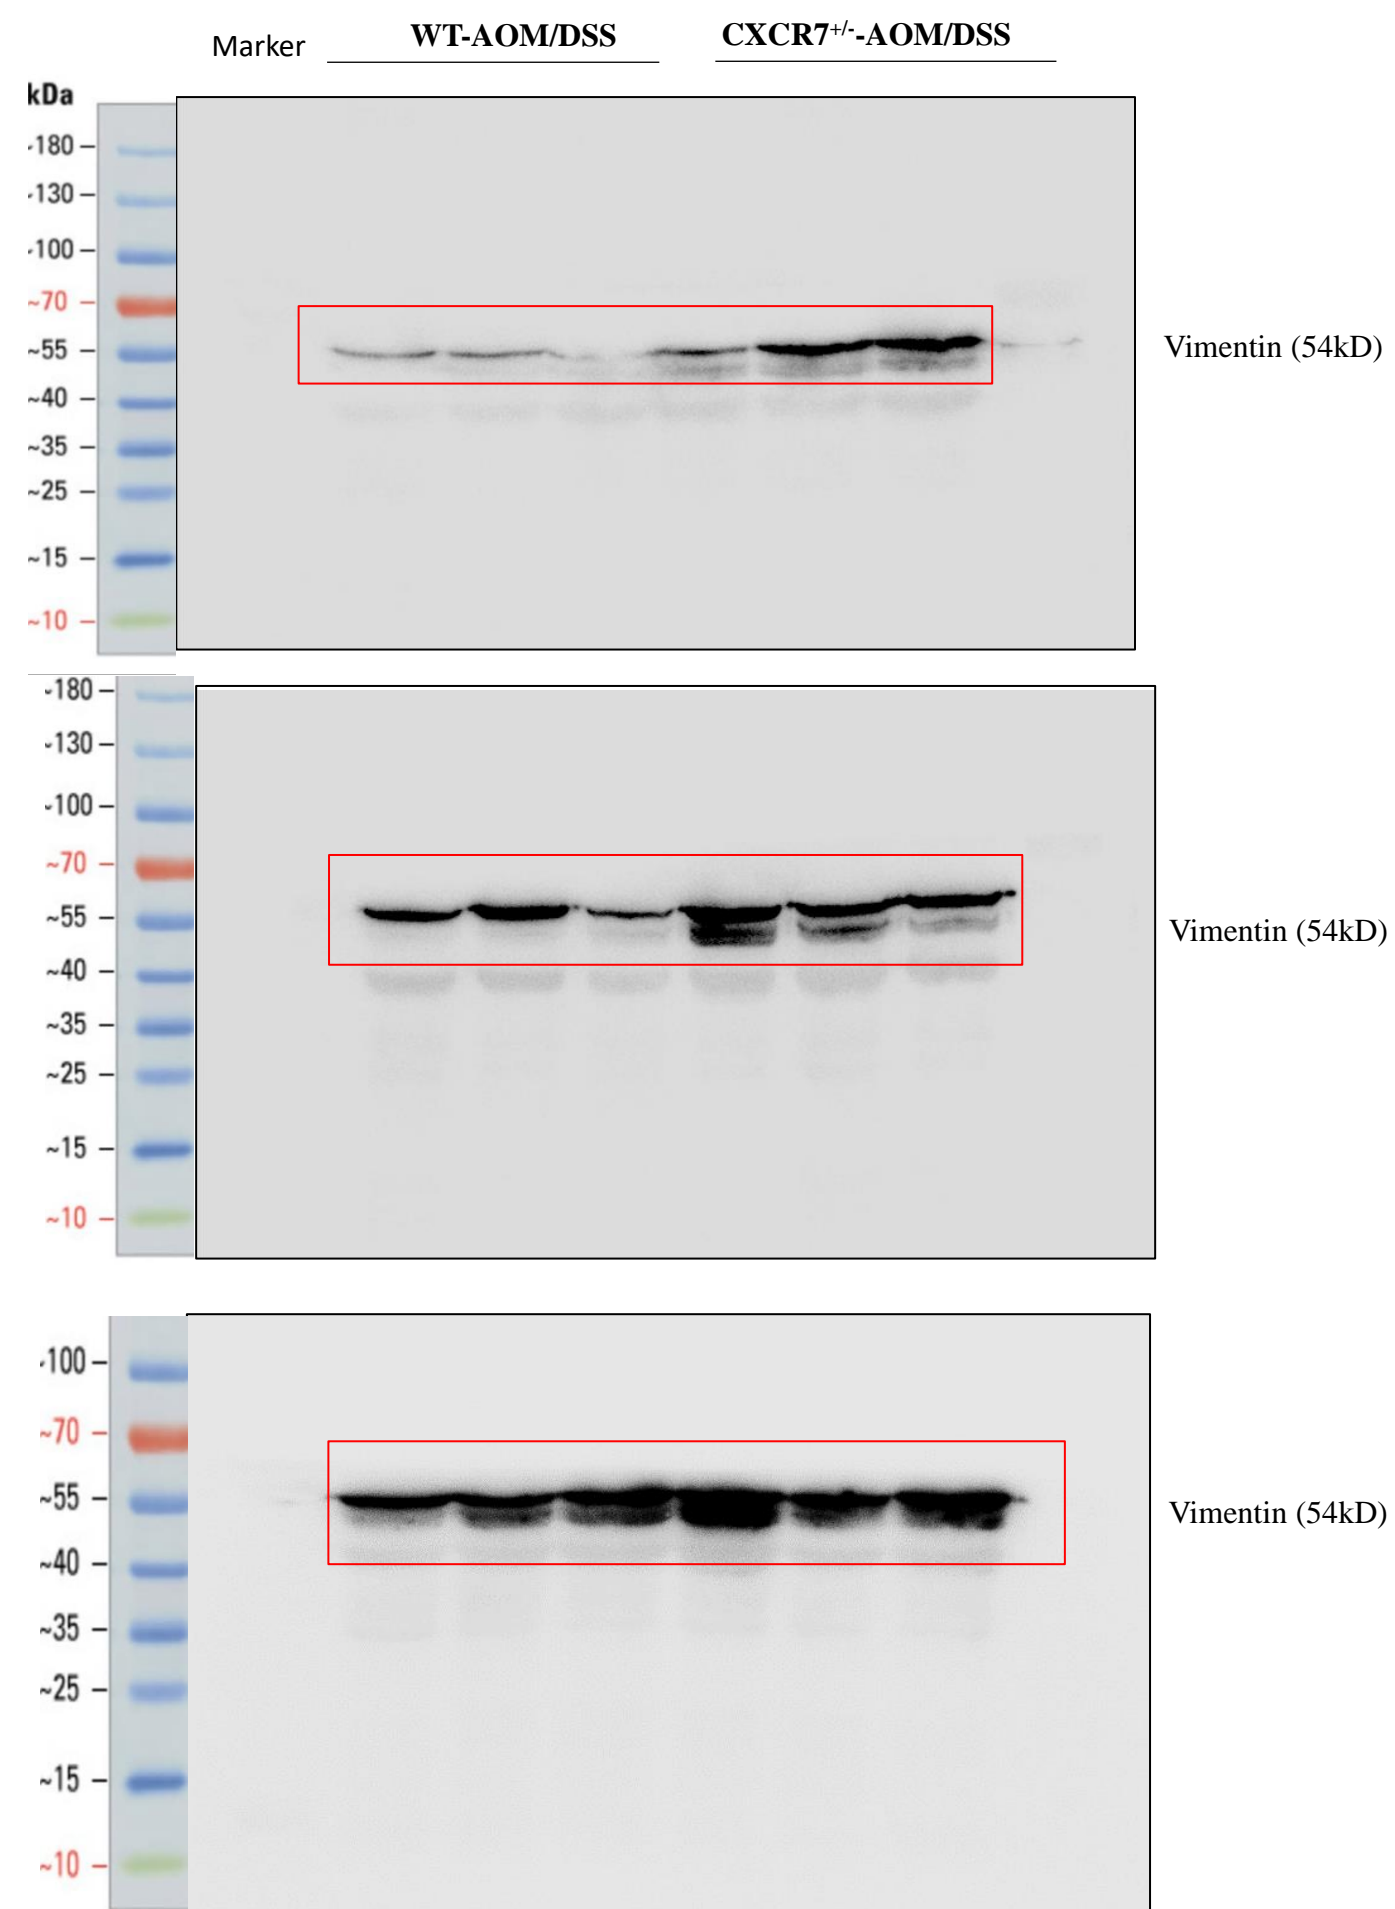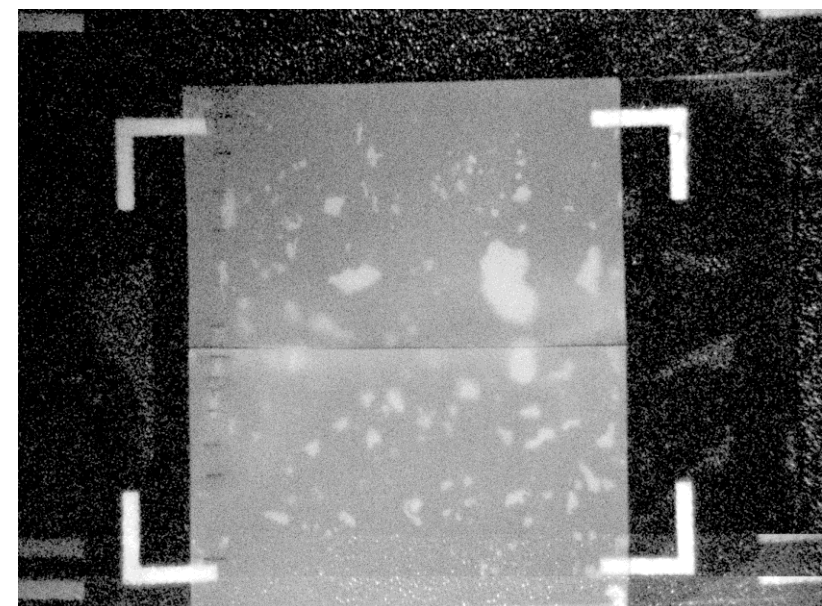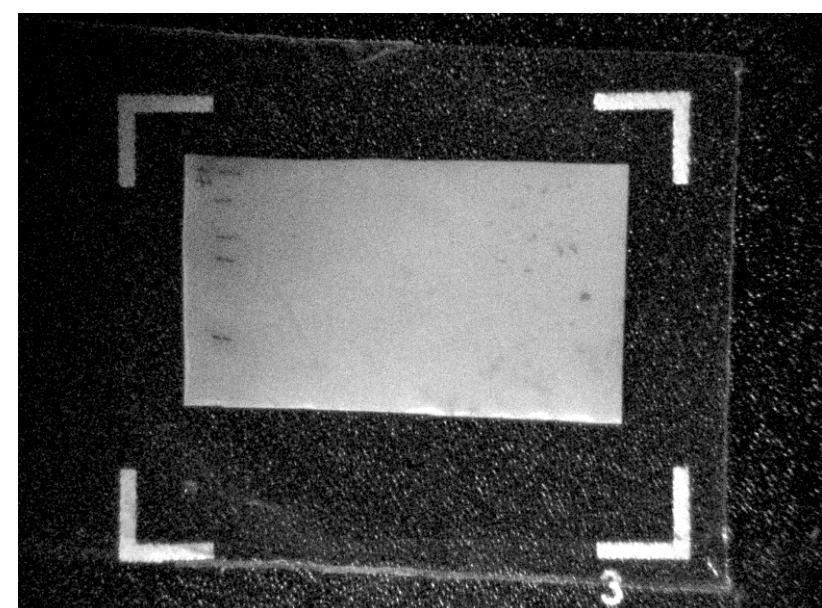



Figure 2E

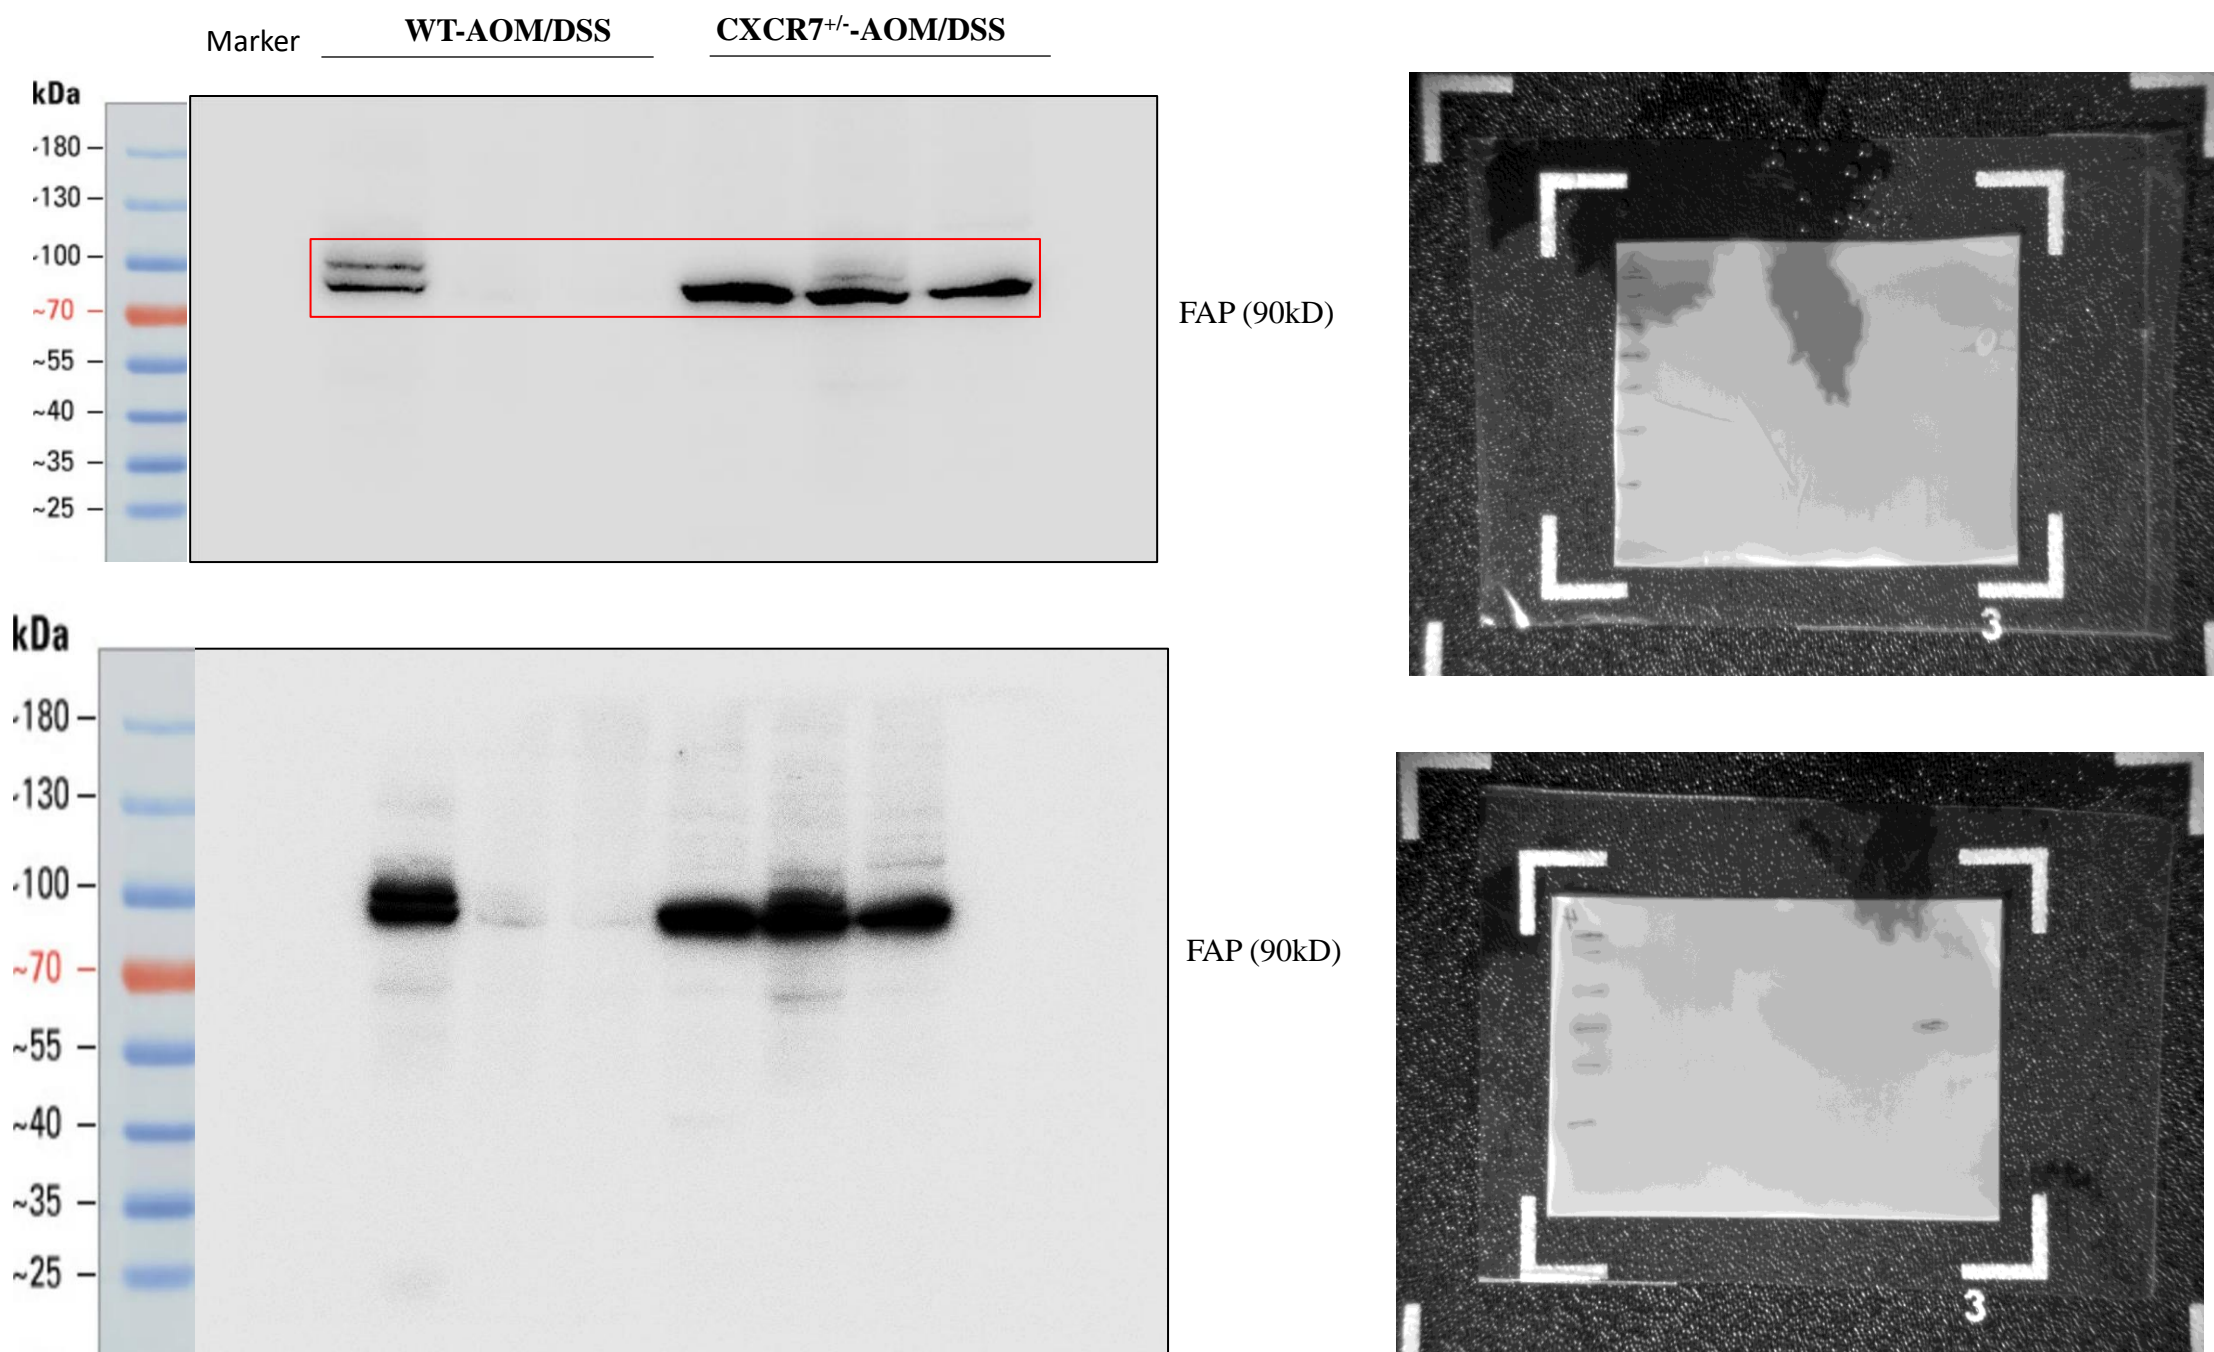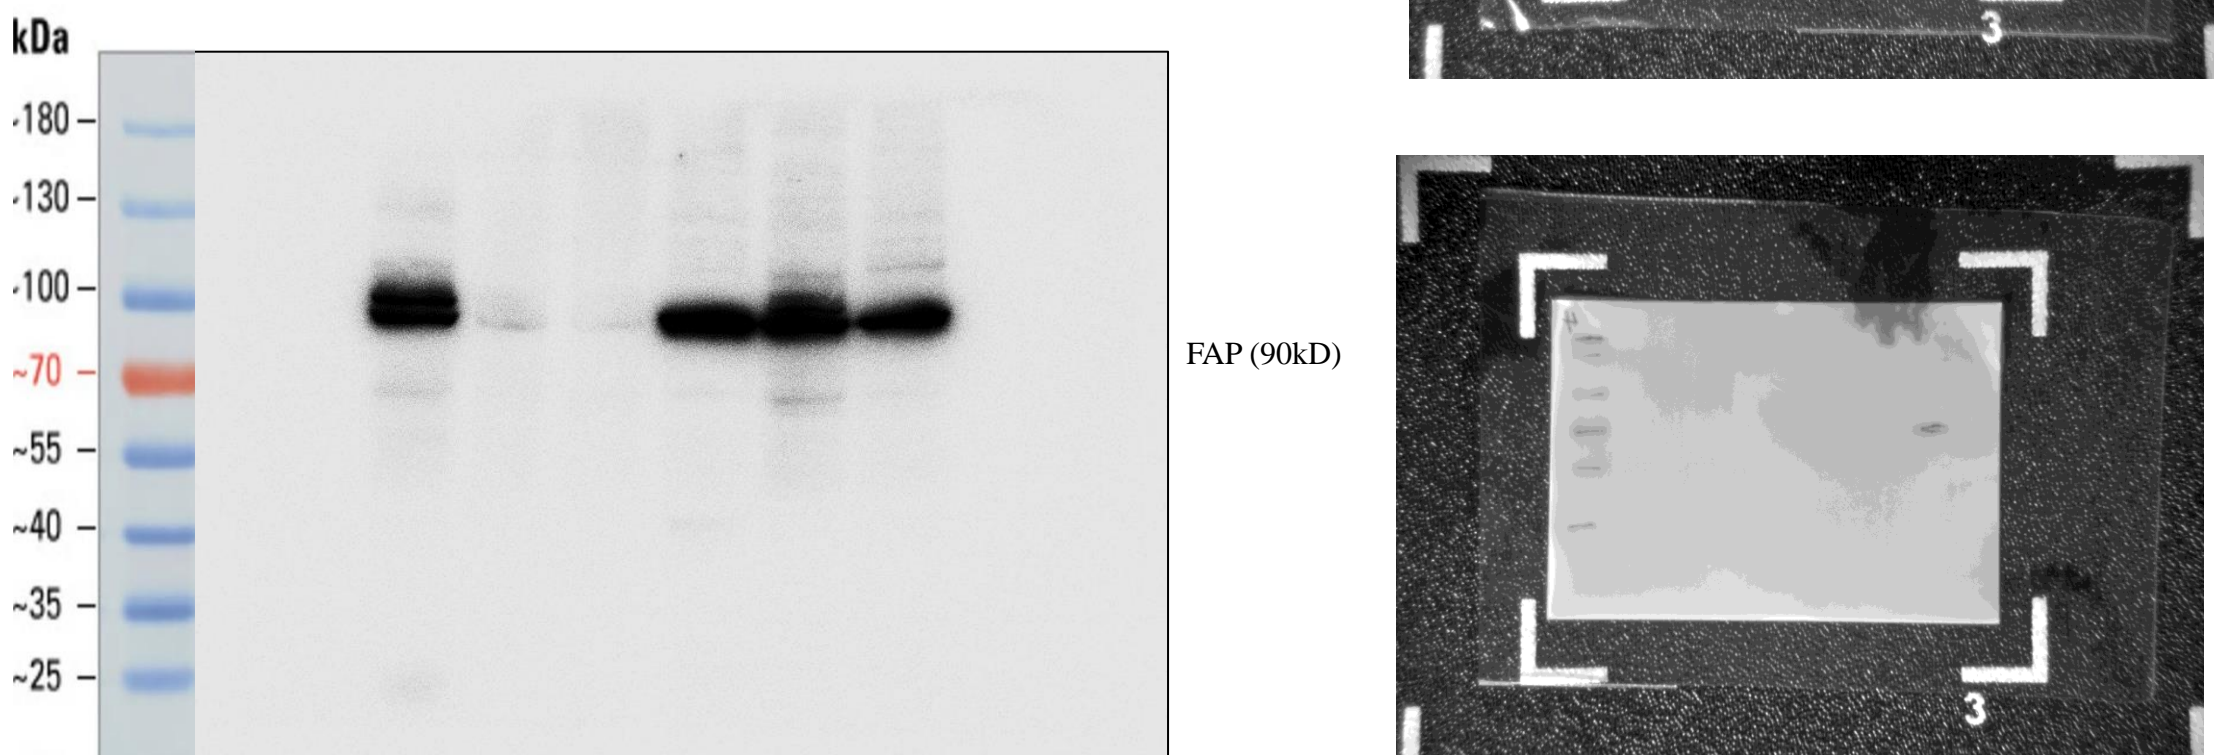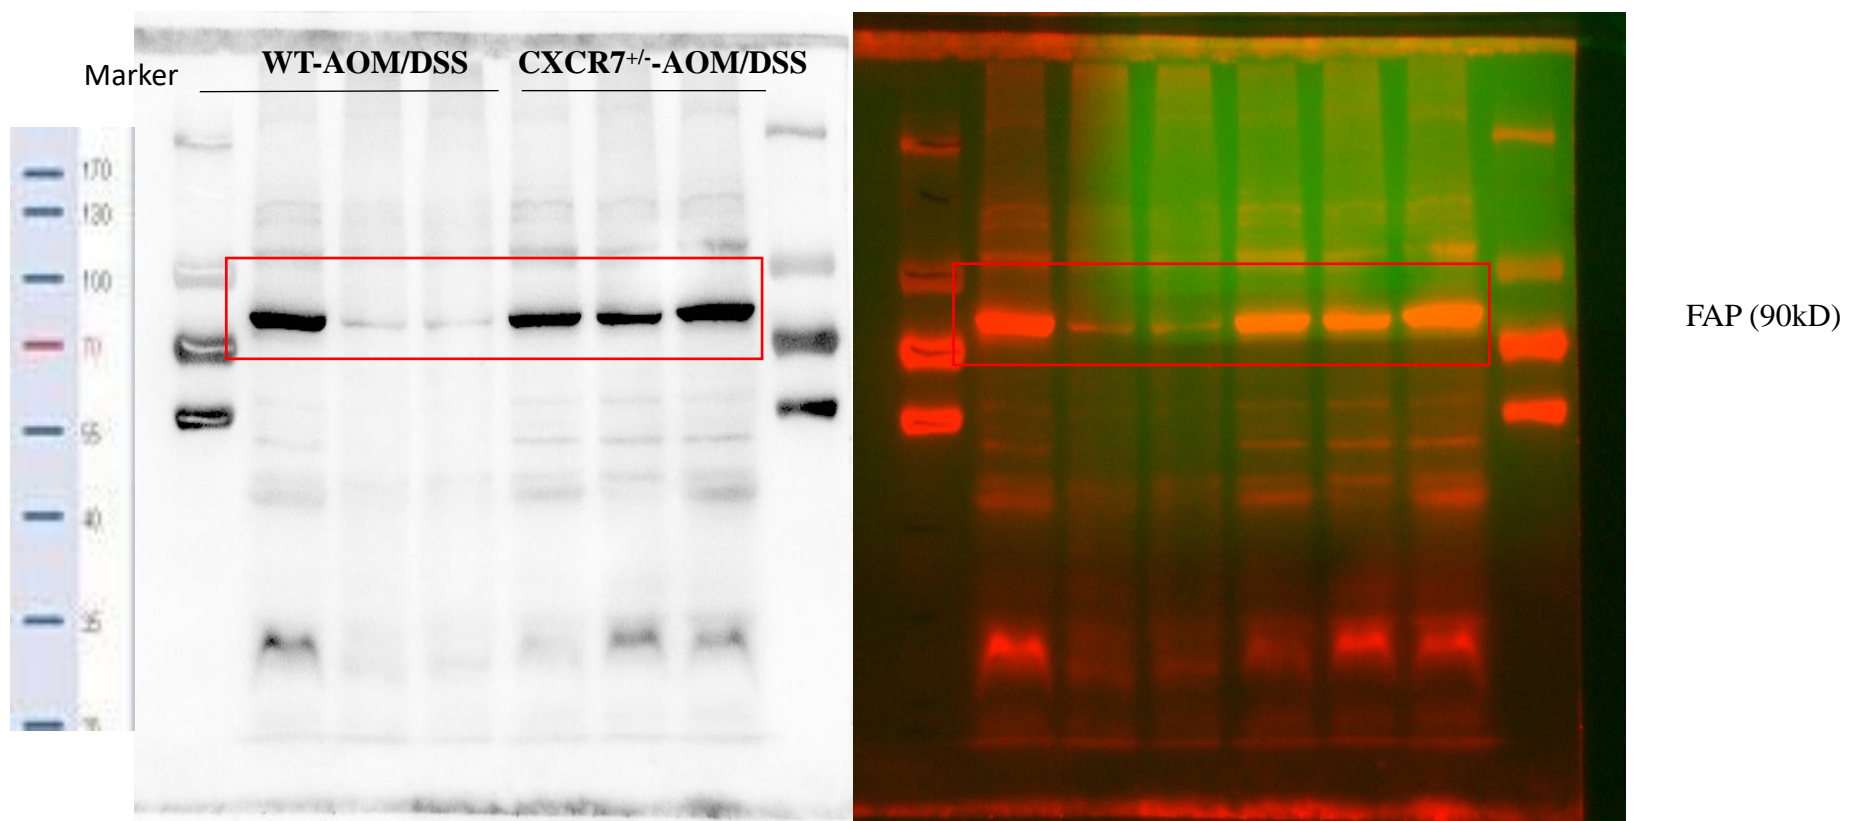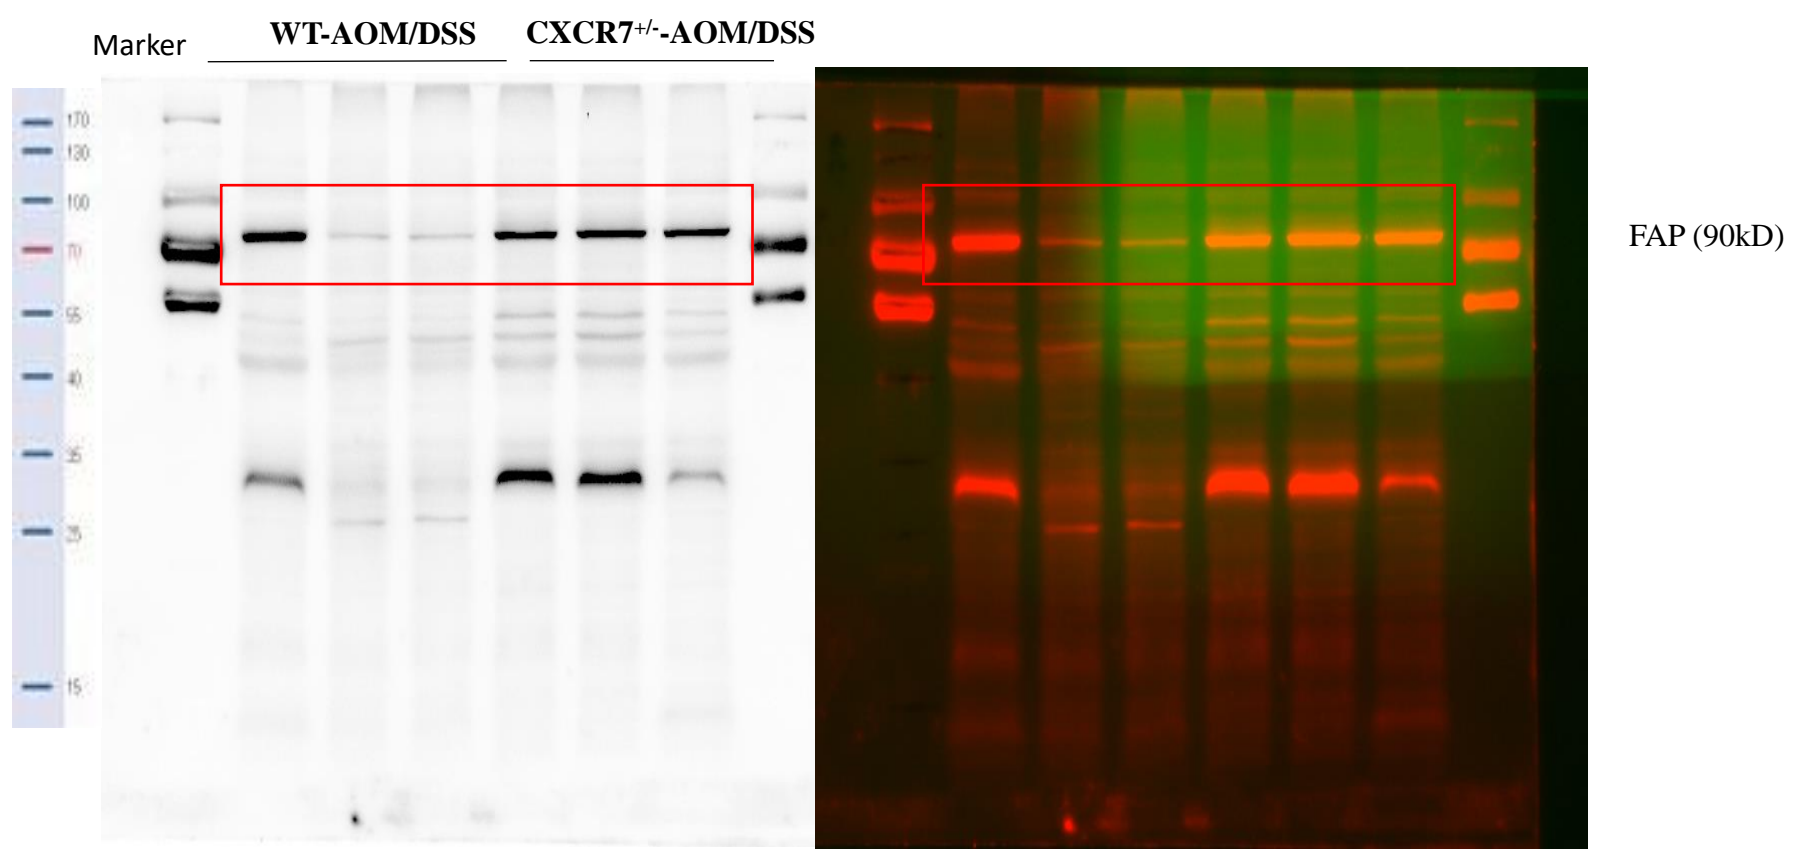



Figure 2E

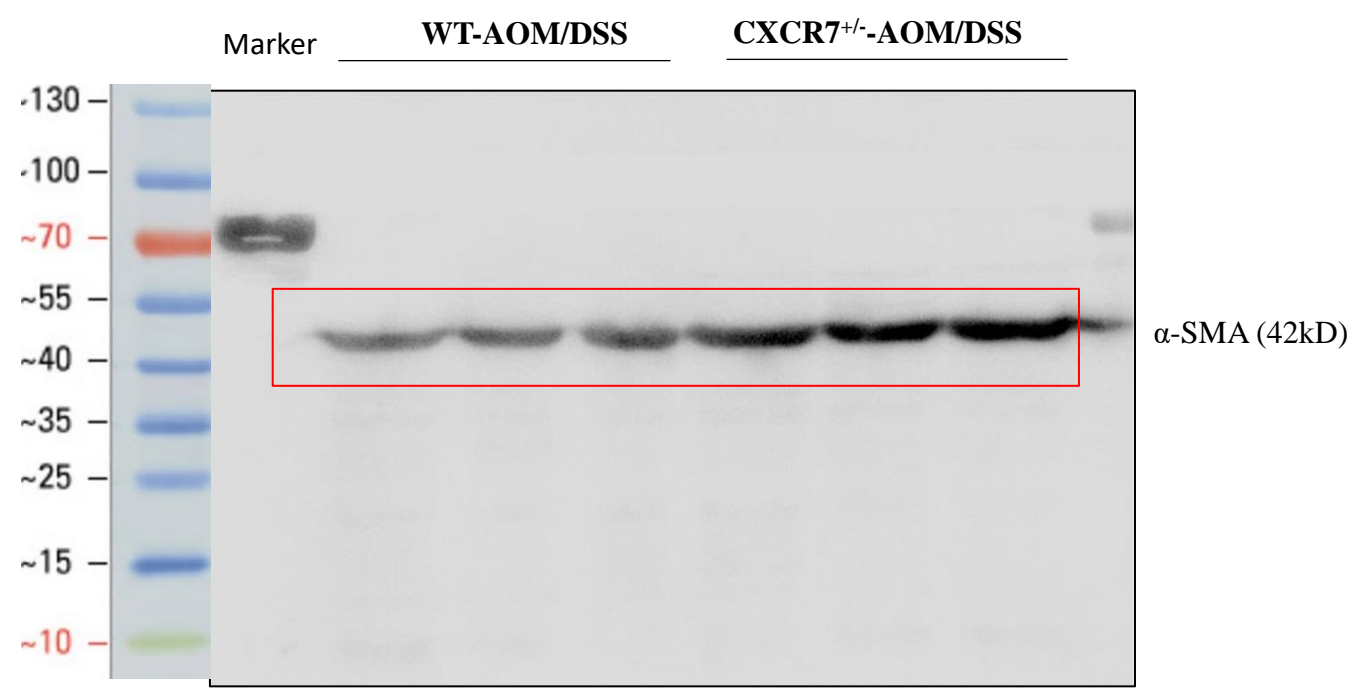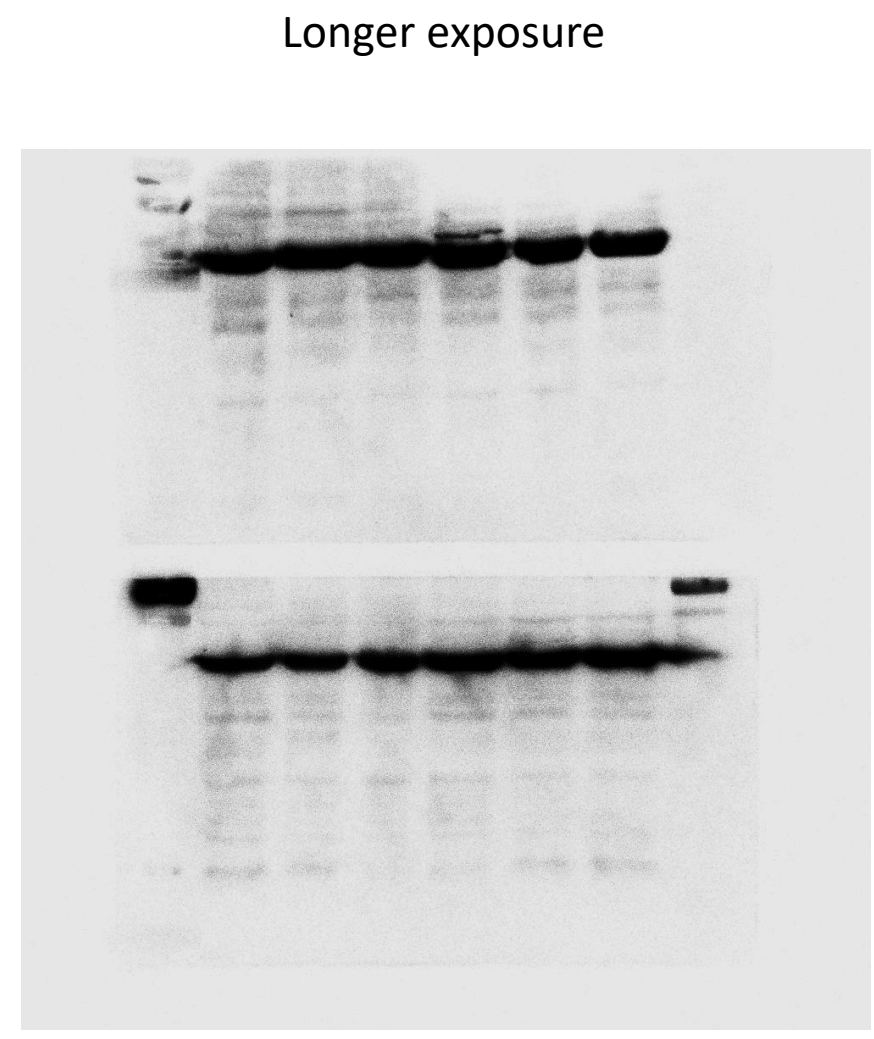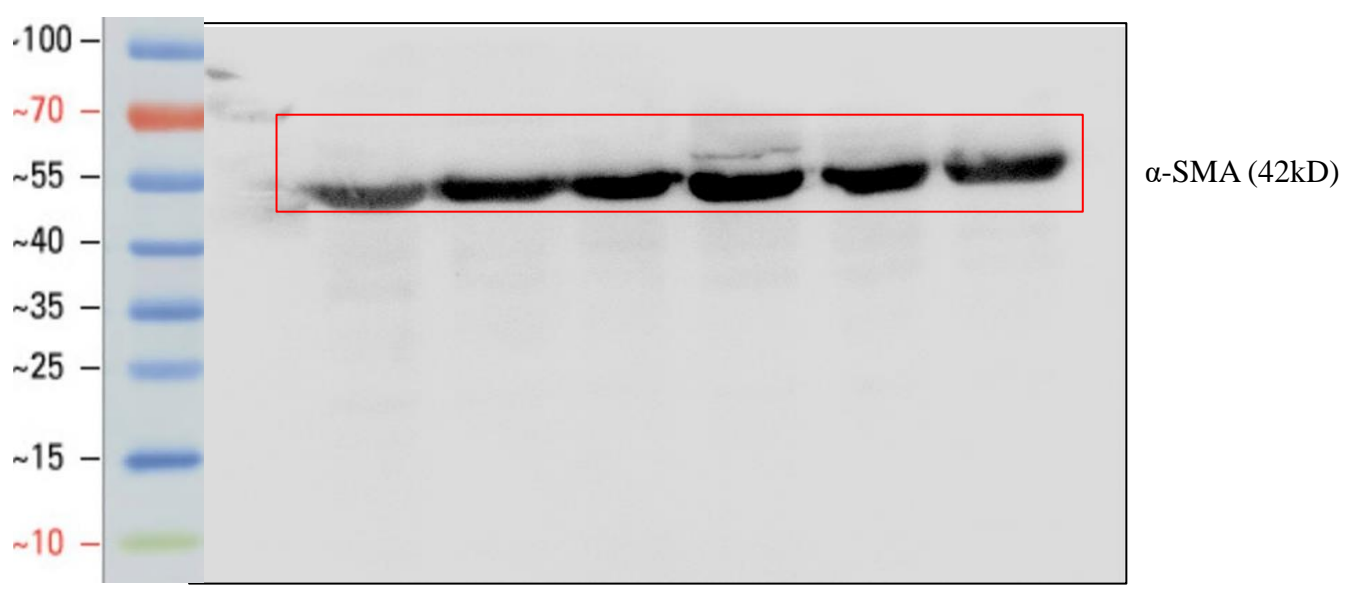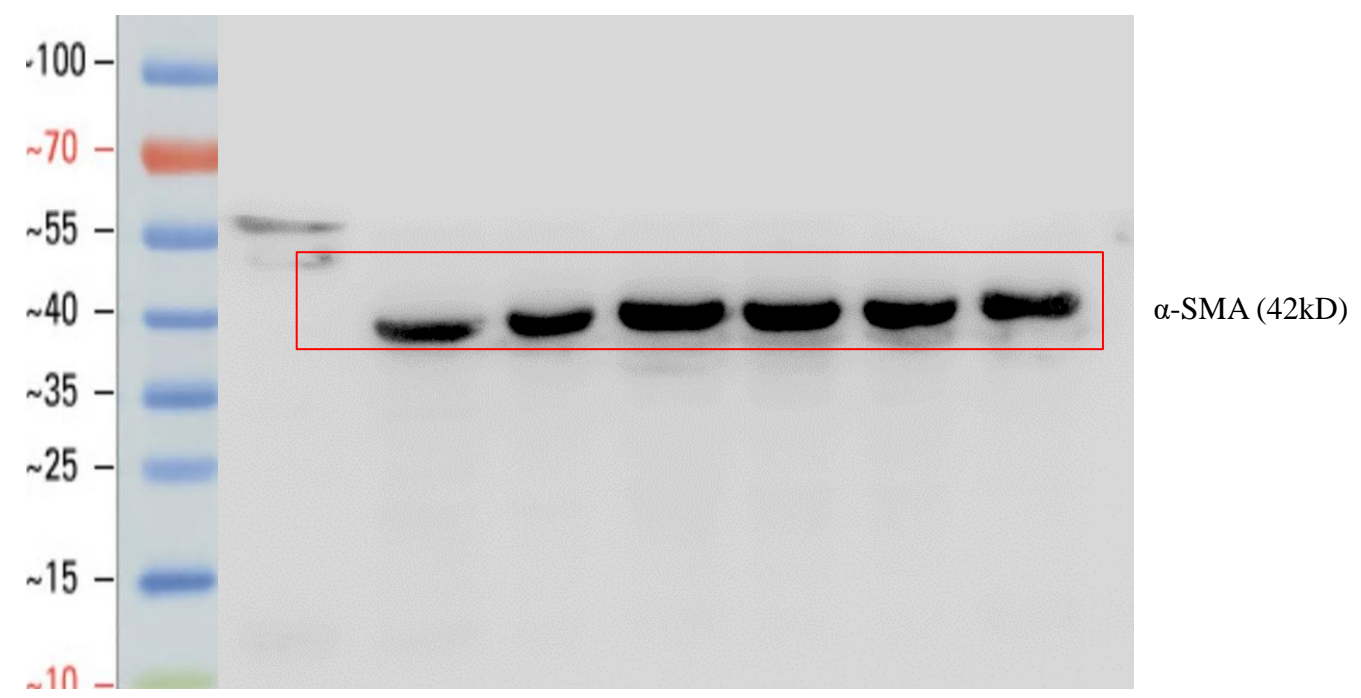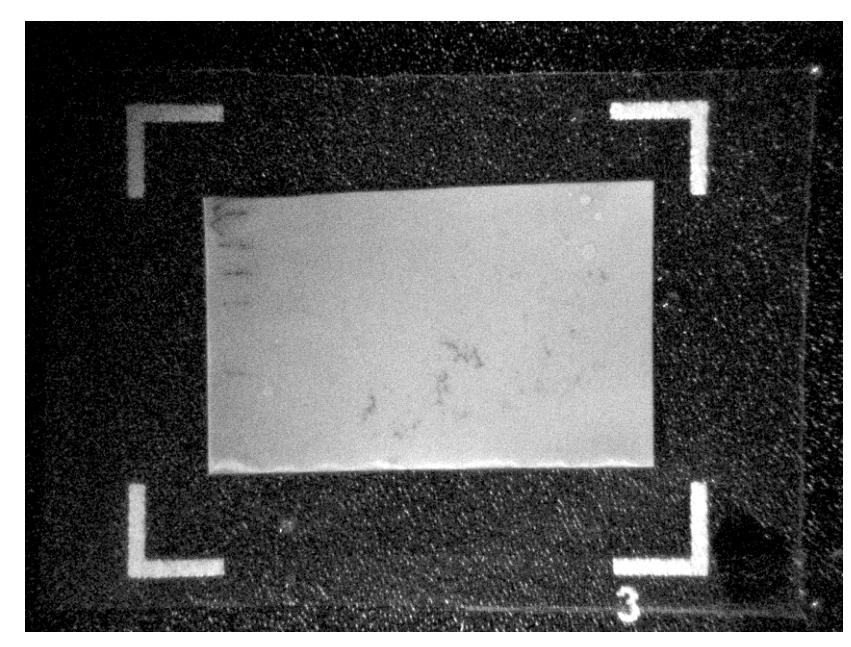



Figure 2E

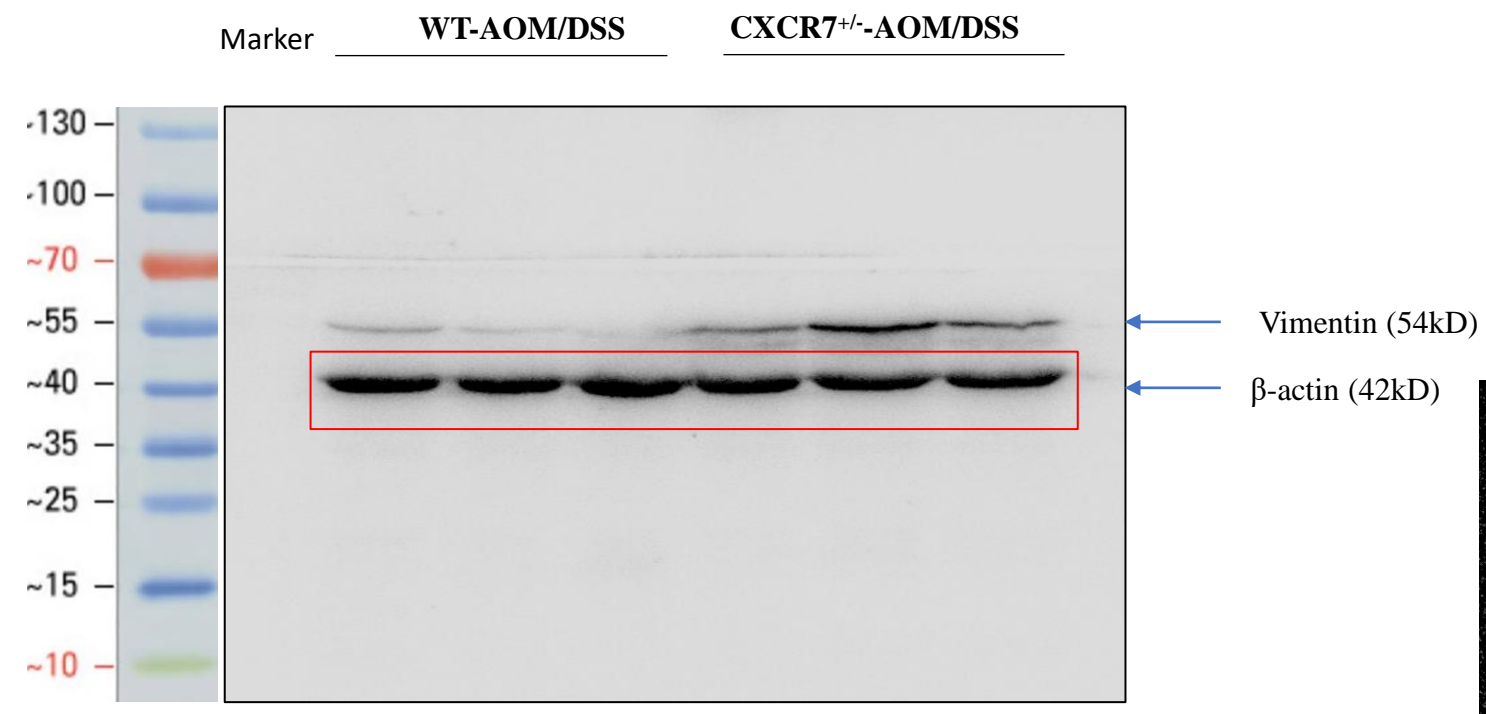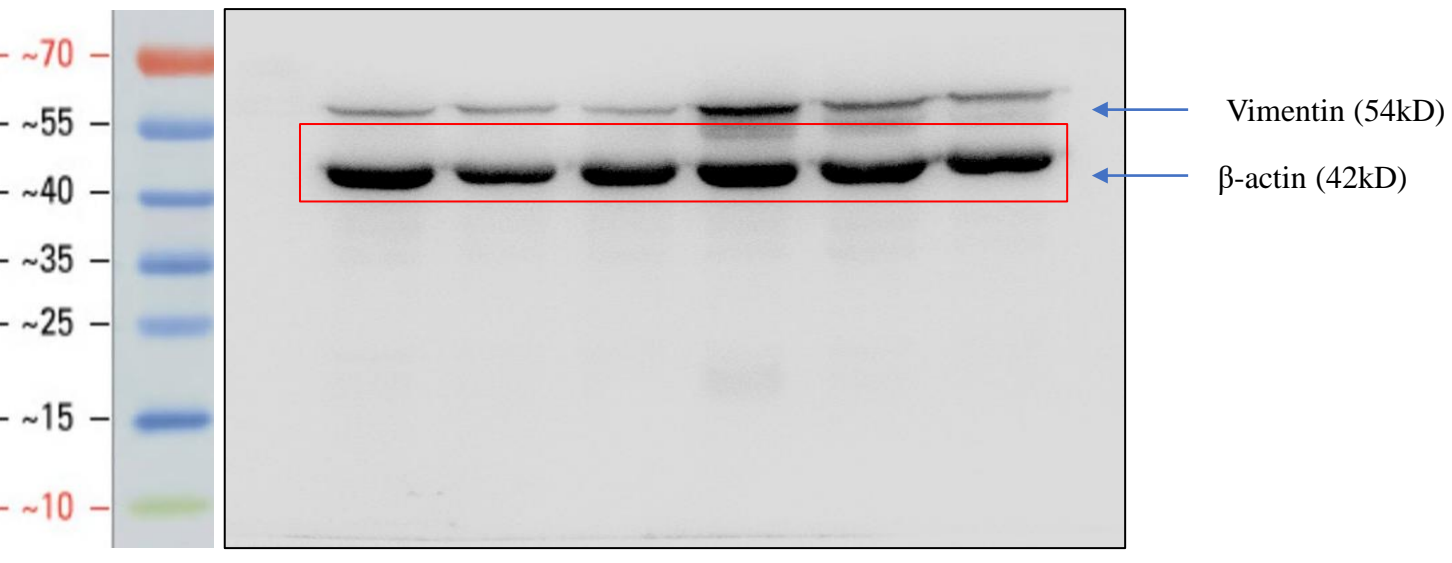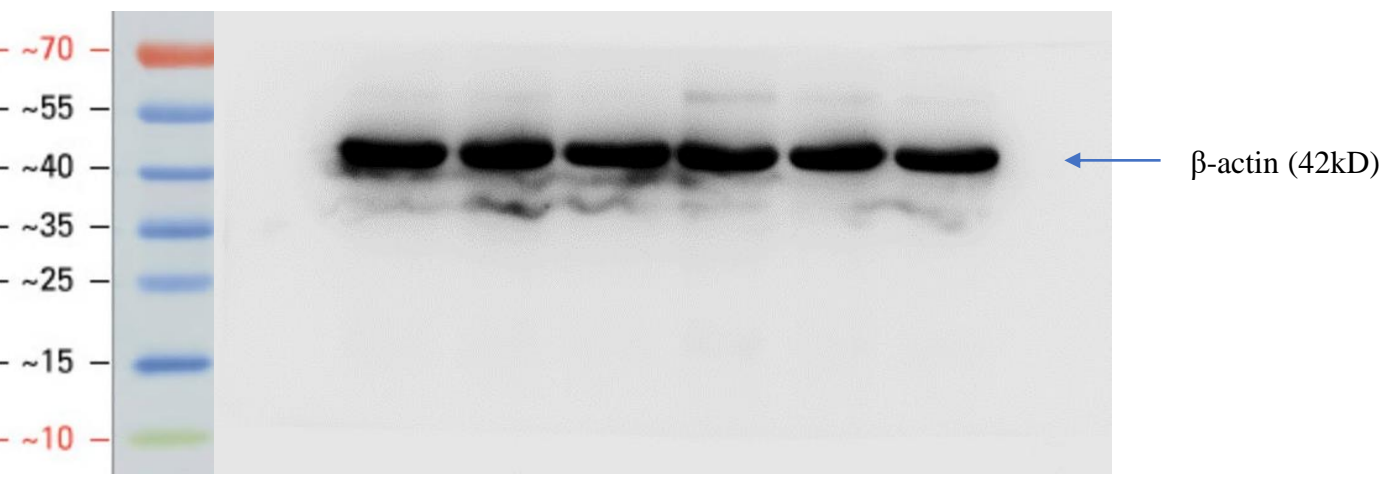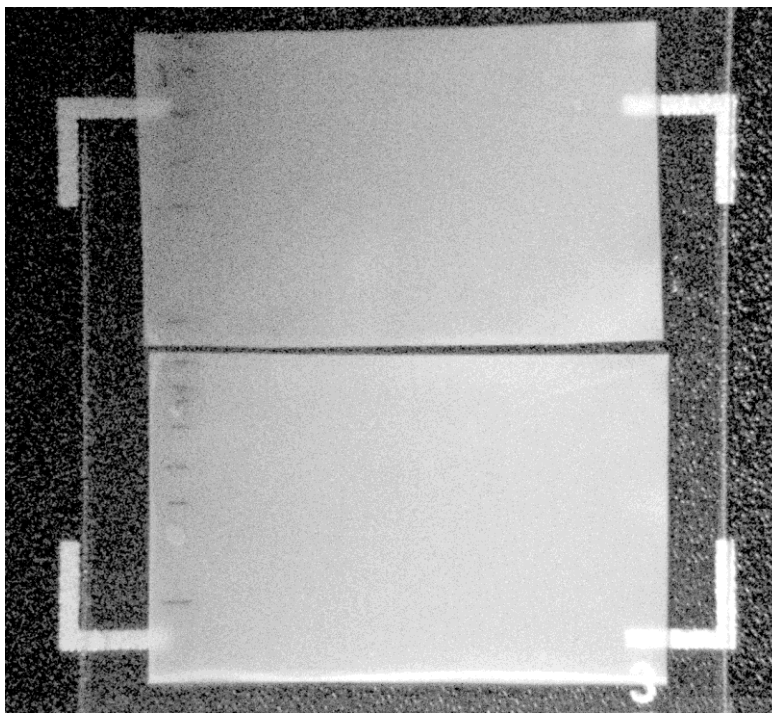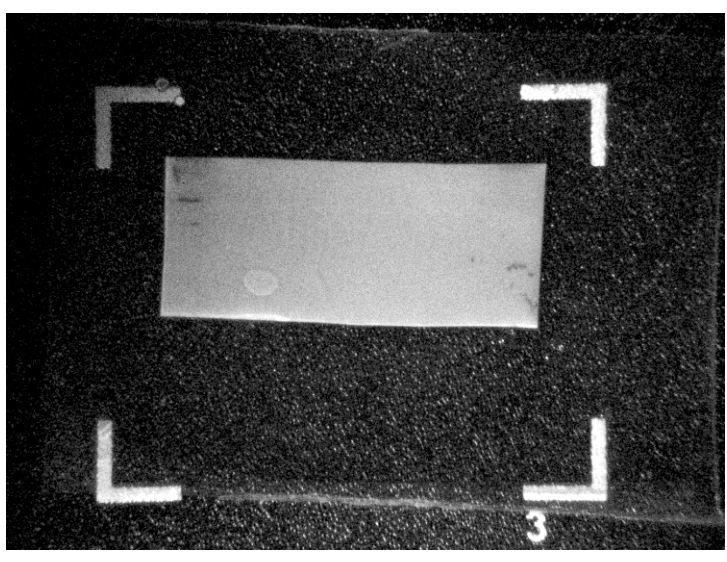

This membrane was first used to detect the band of vimentin, then used to detect internal control  $\beta$ -actin.



Figure 2E

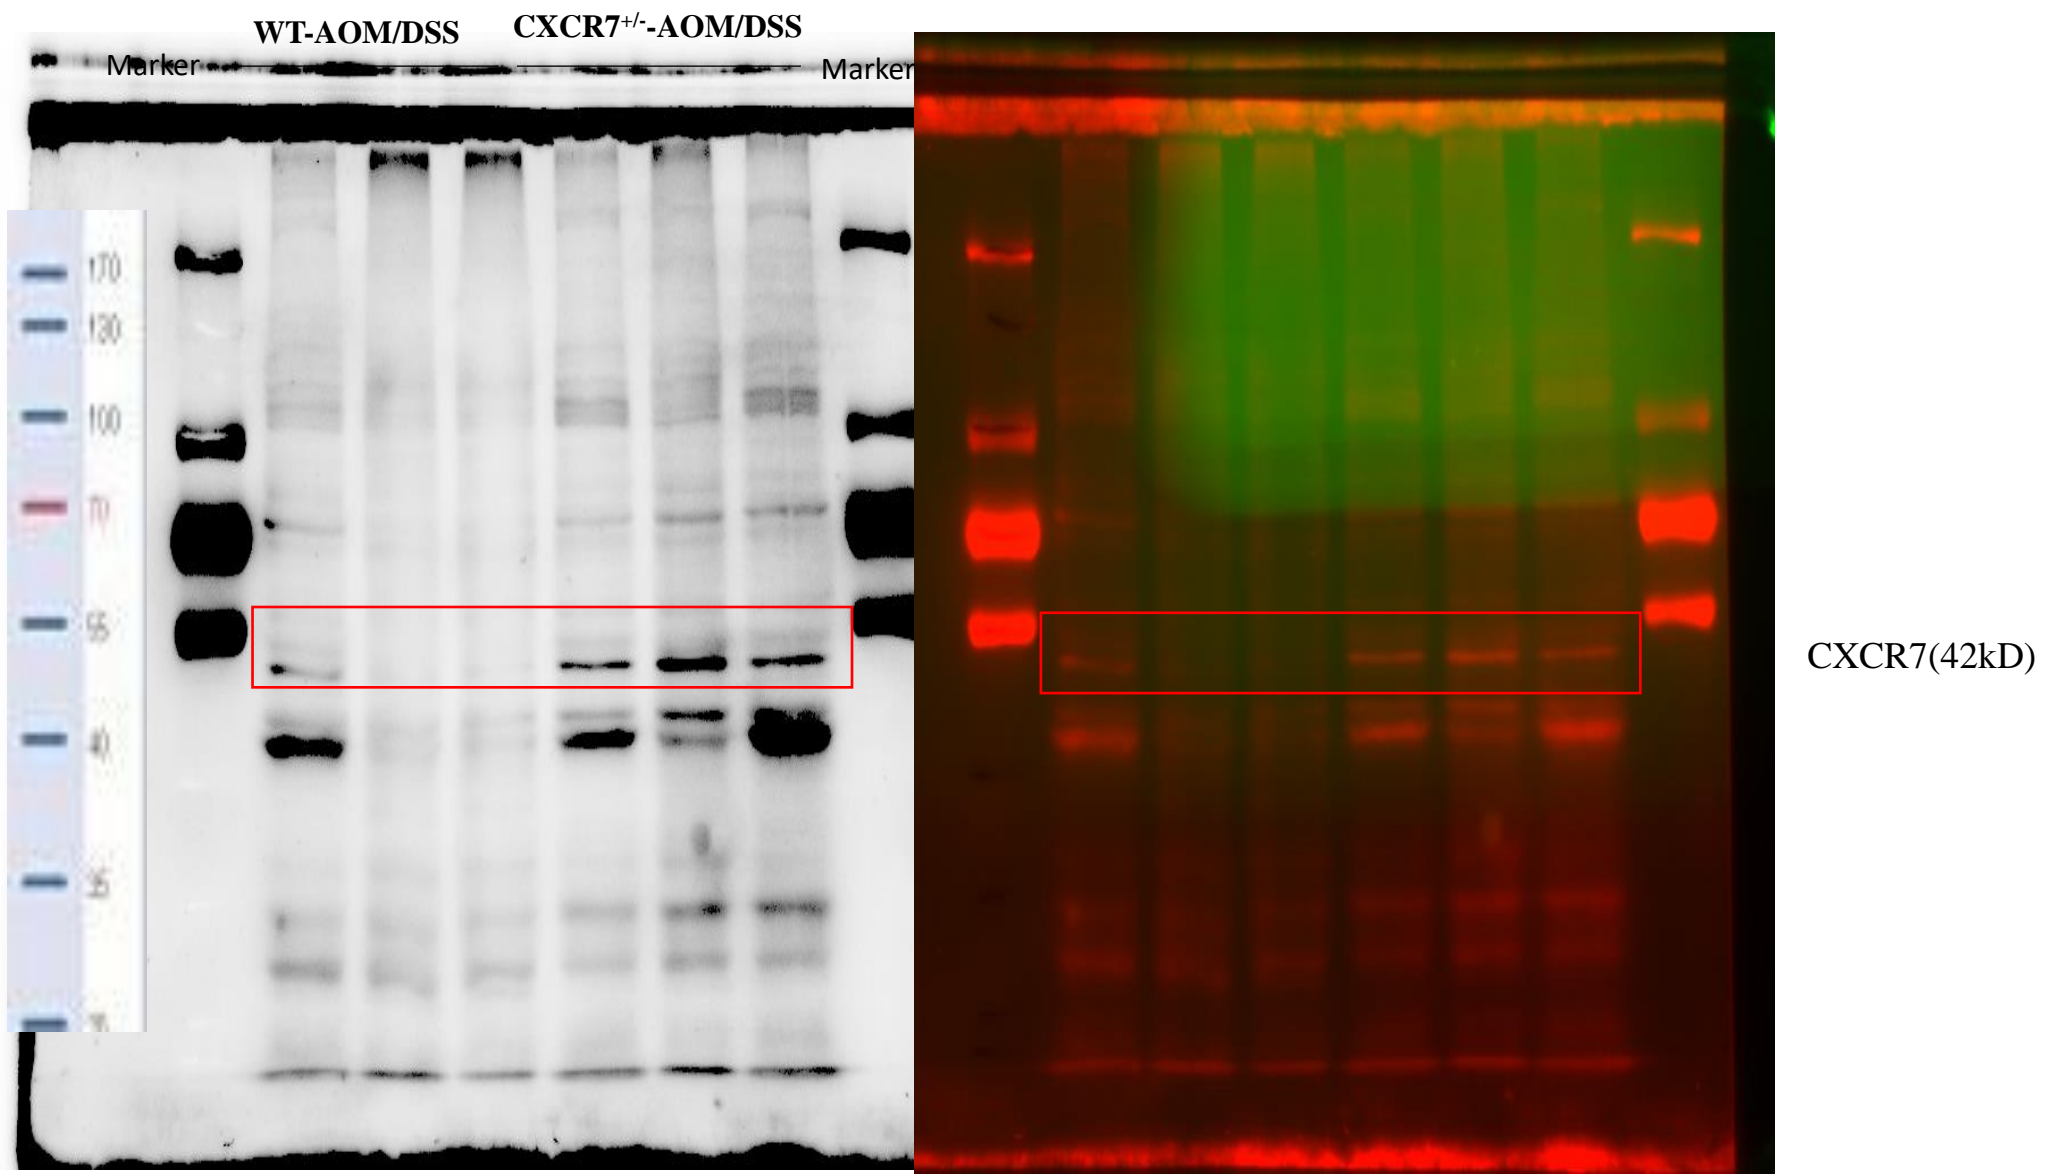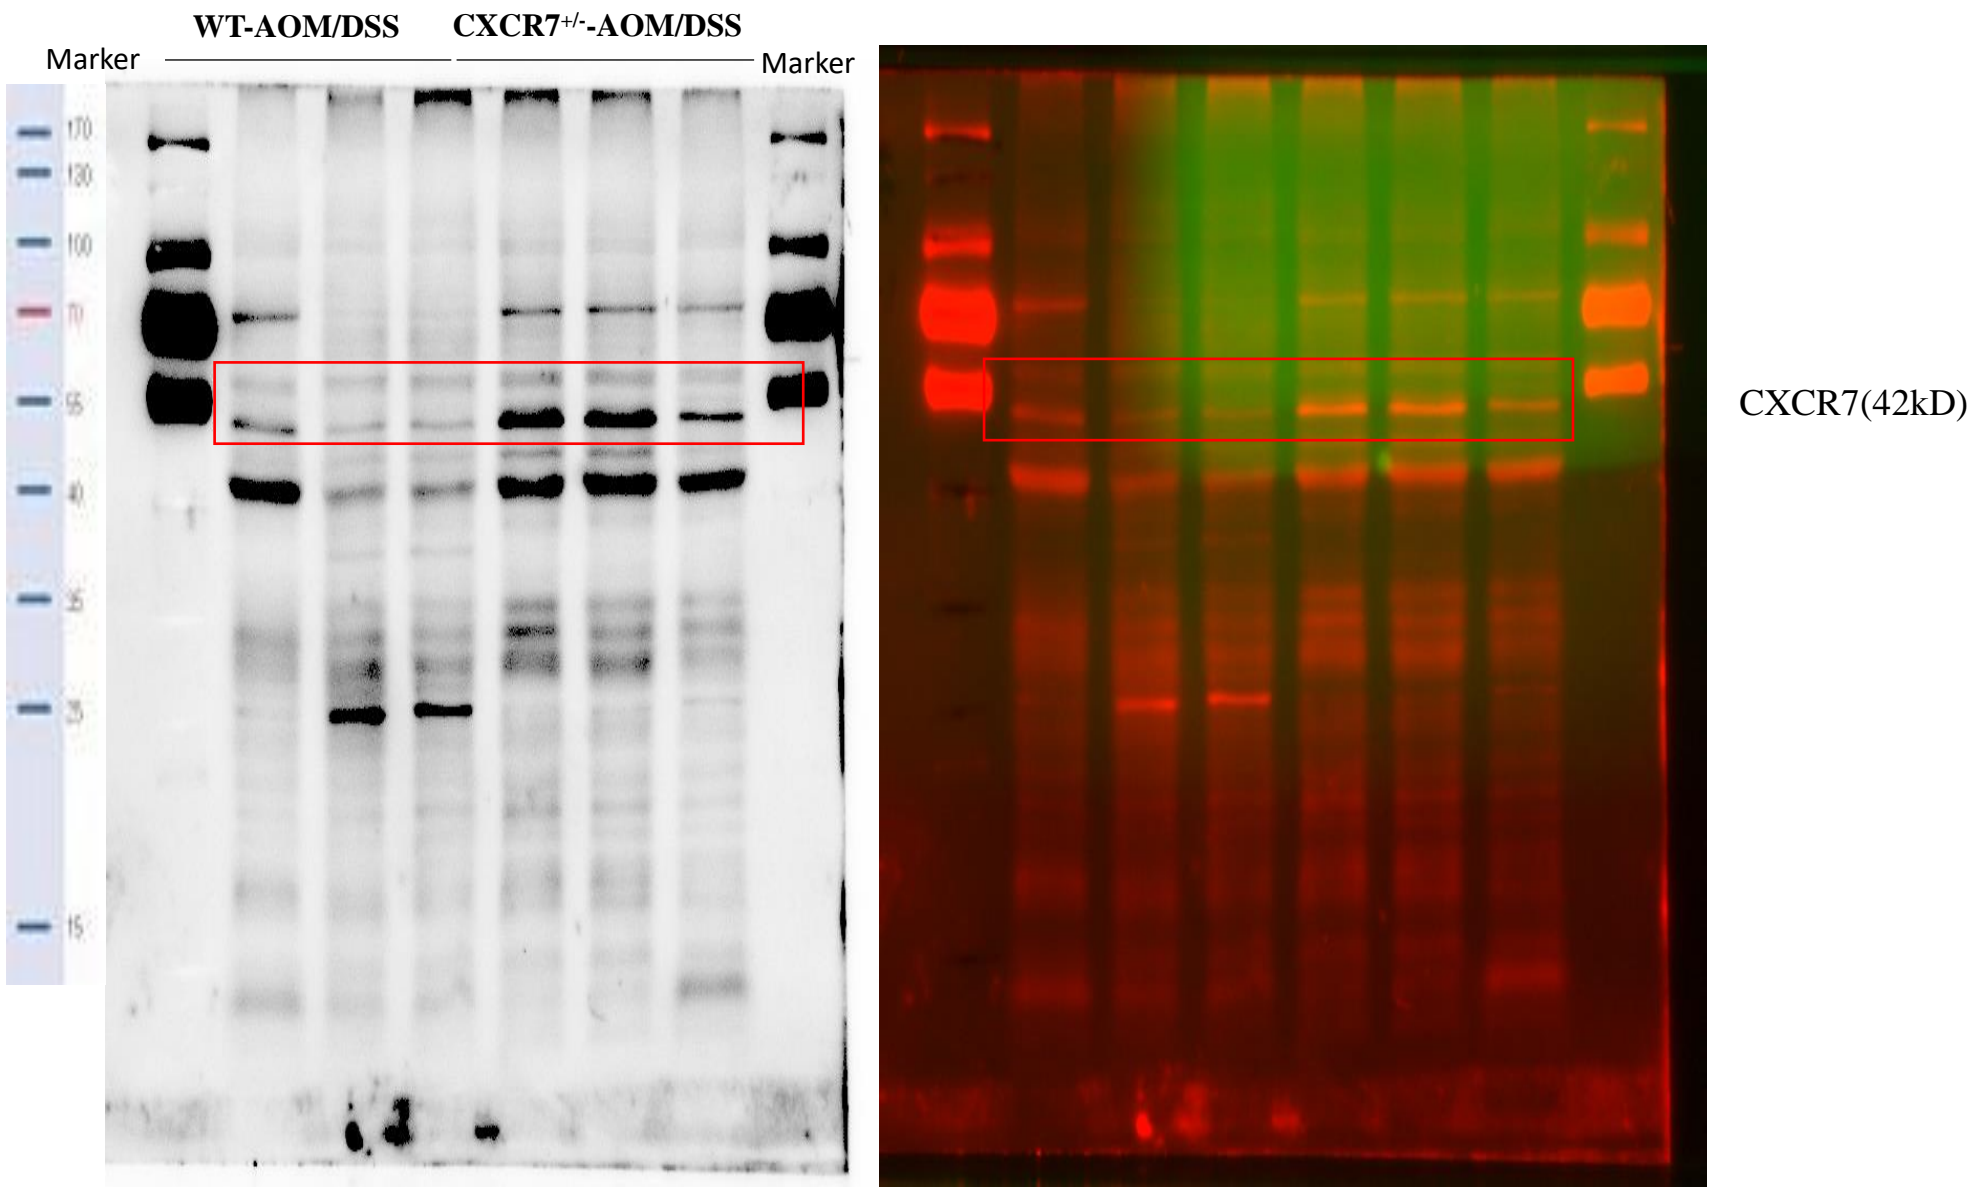



Figure 3A

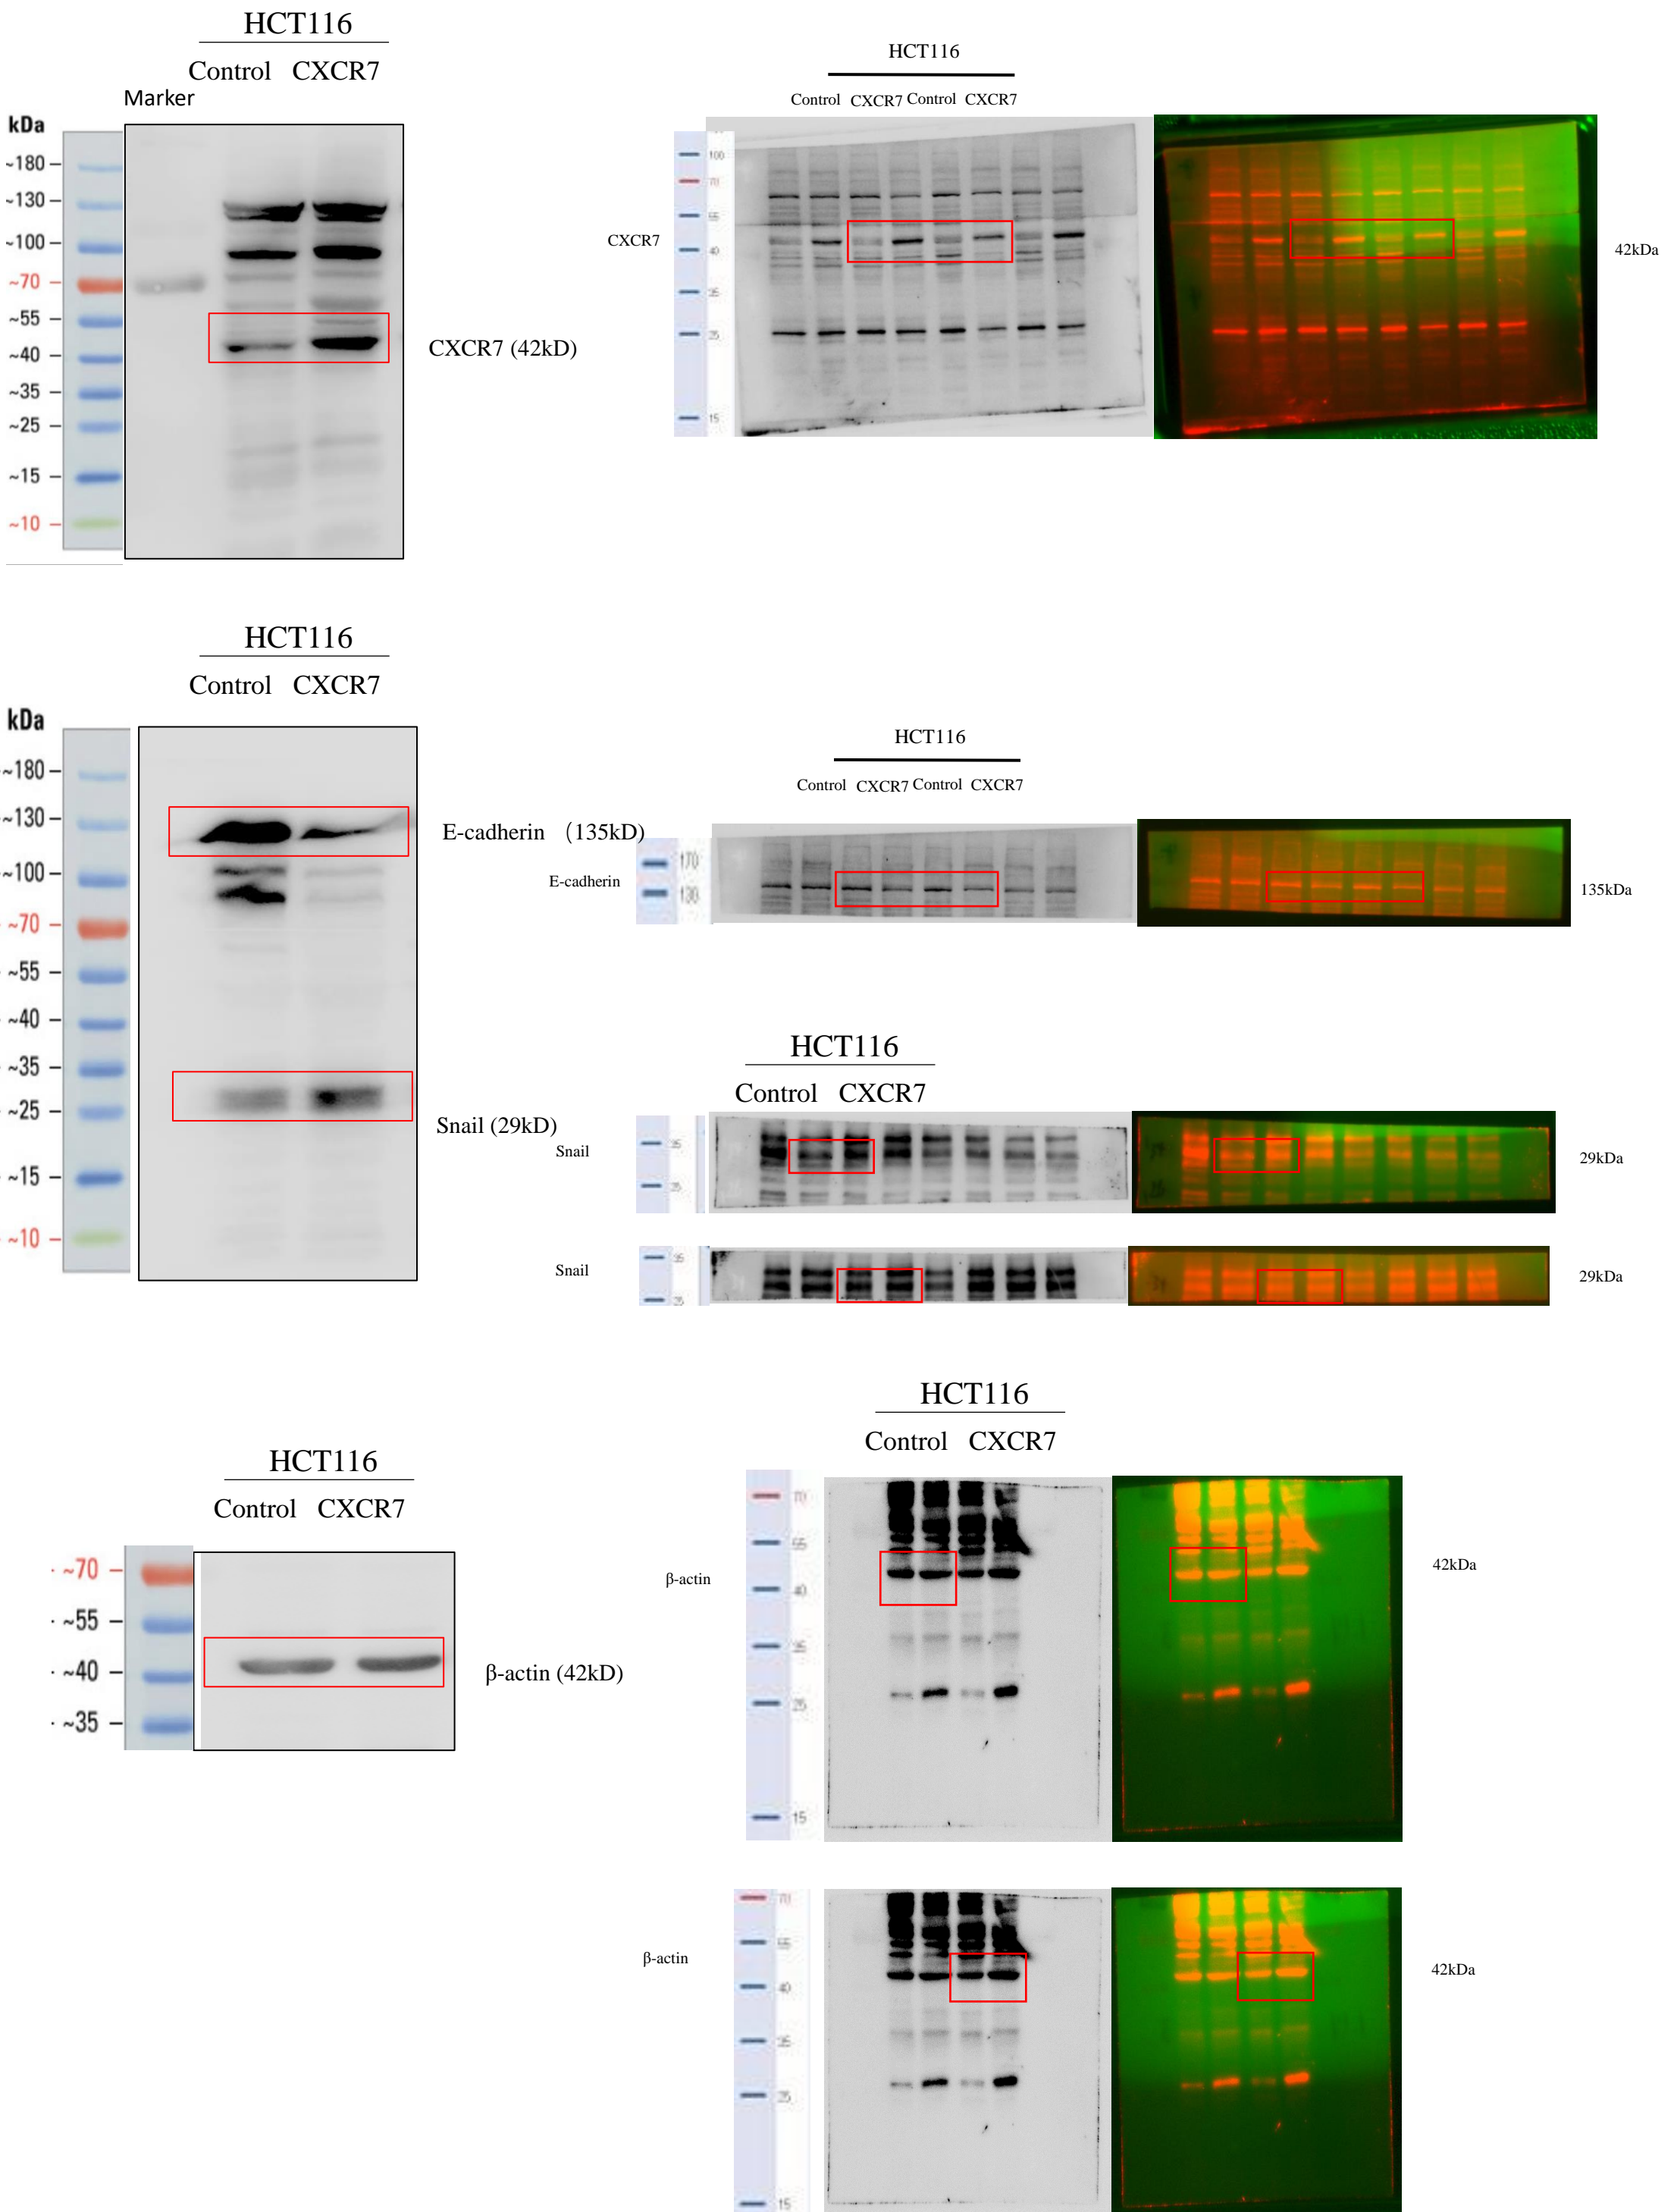



Figure 4B

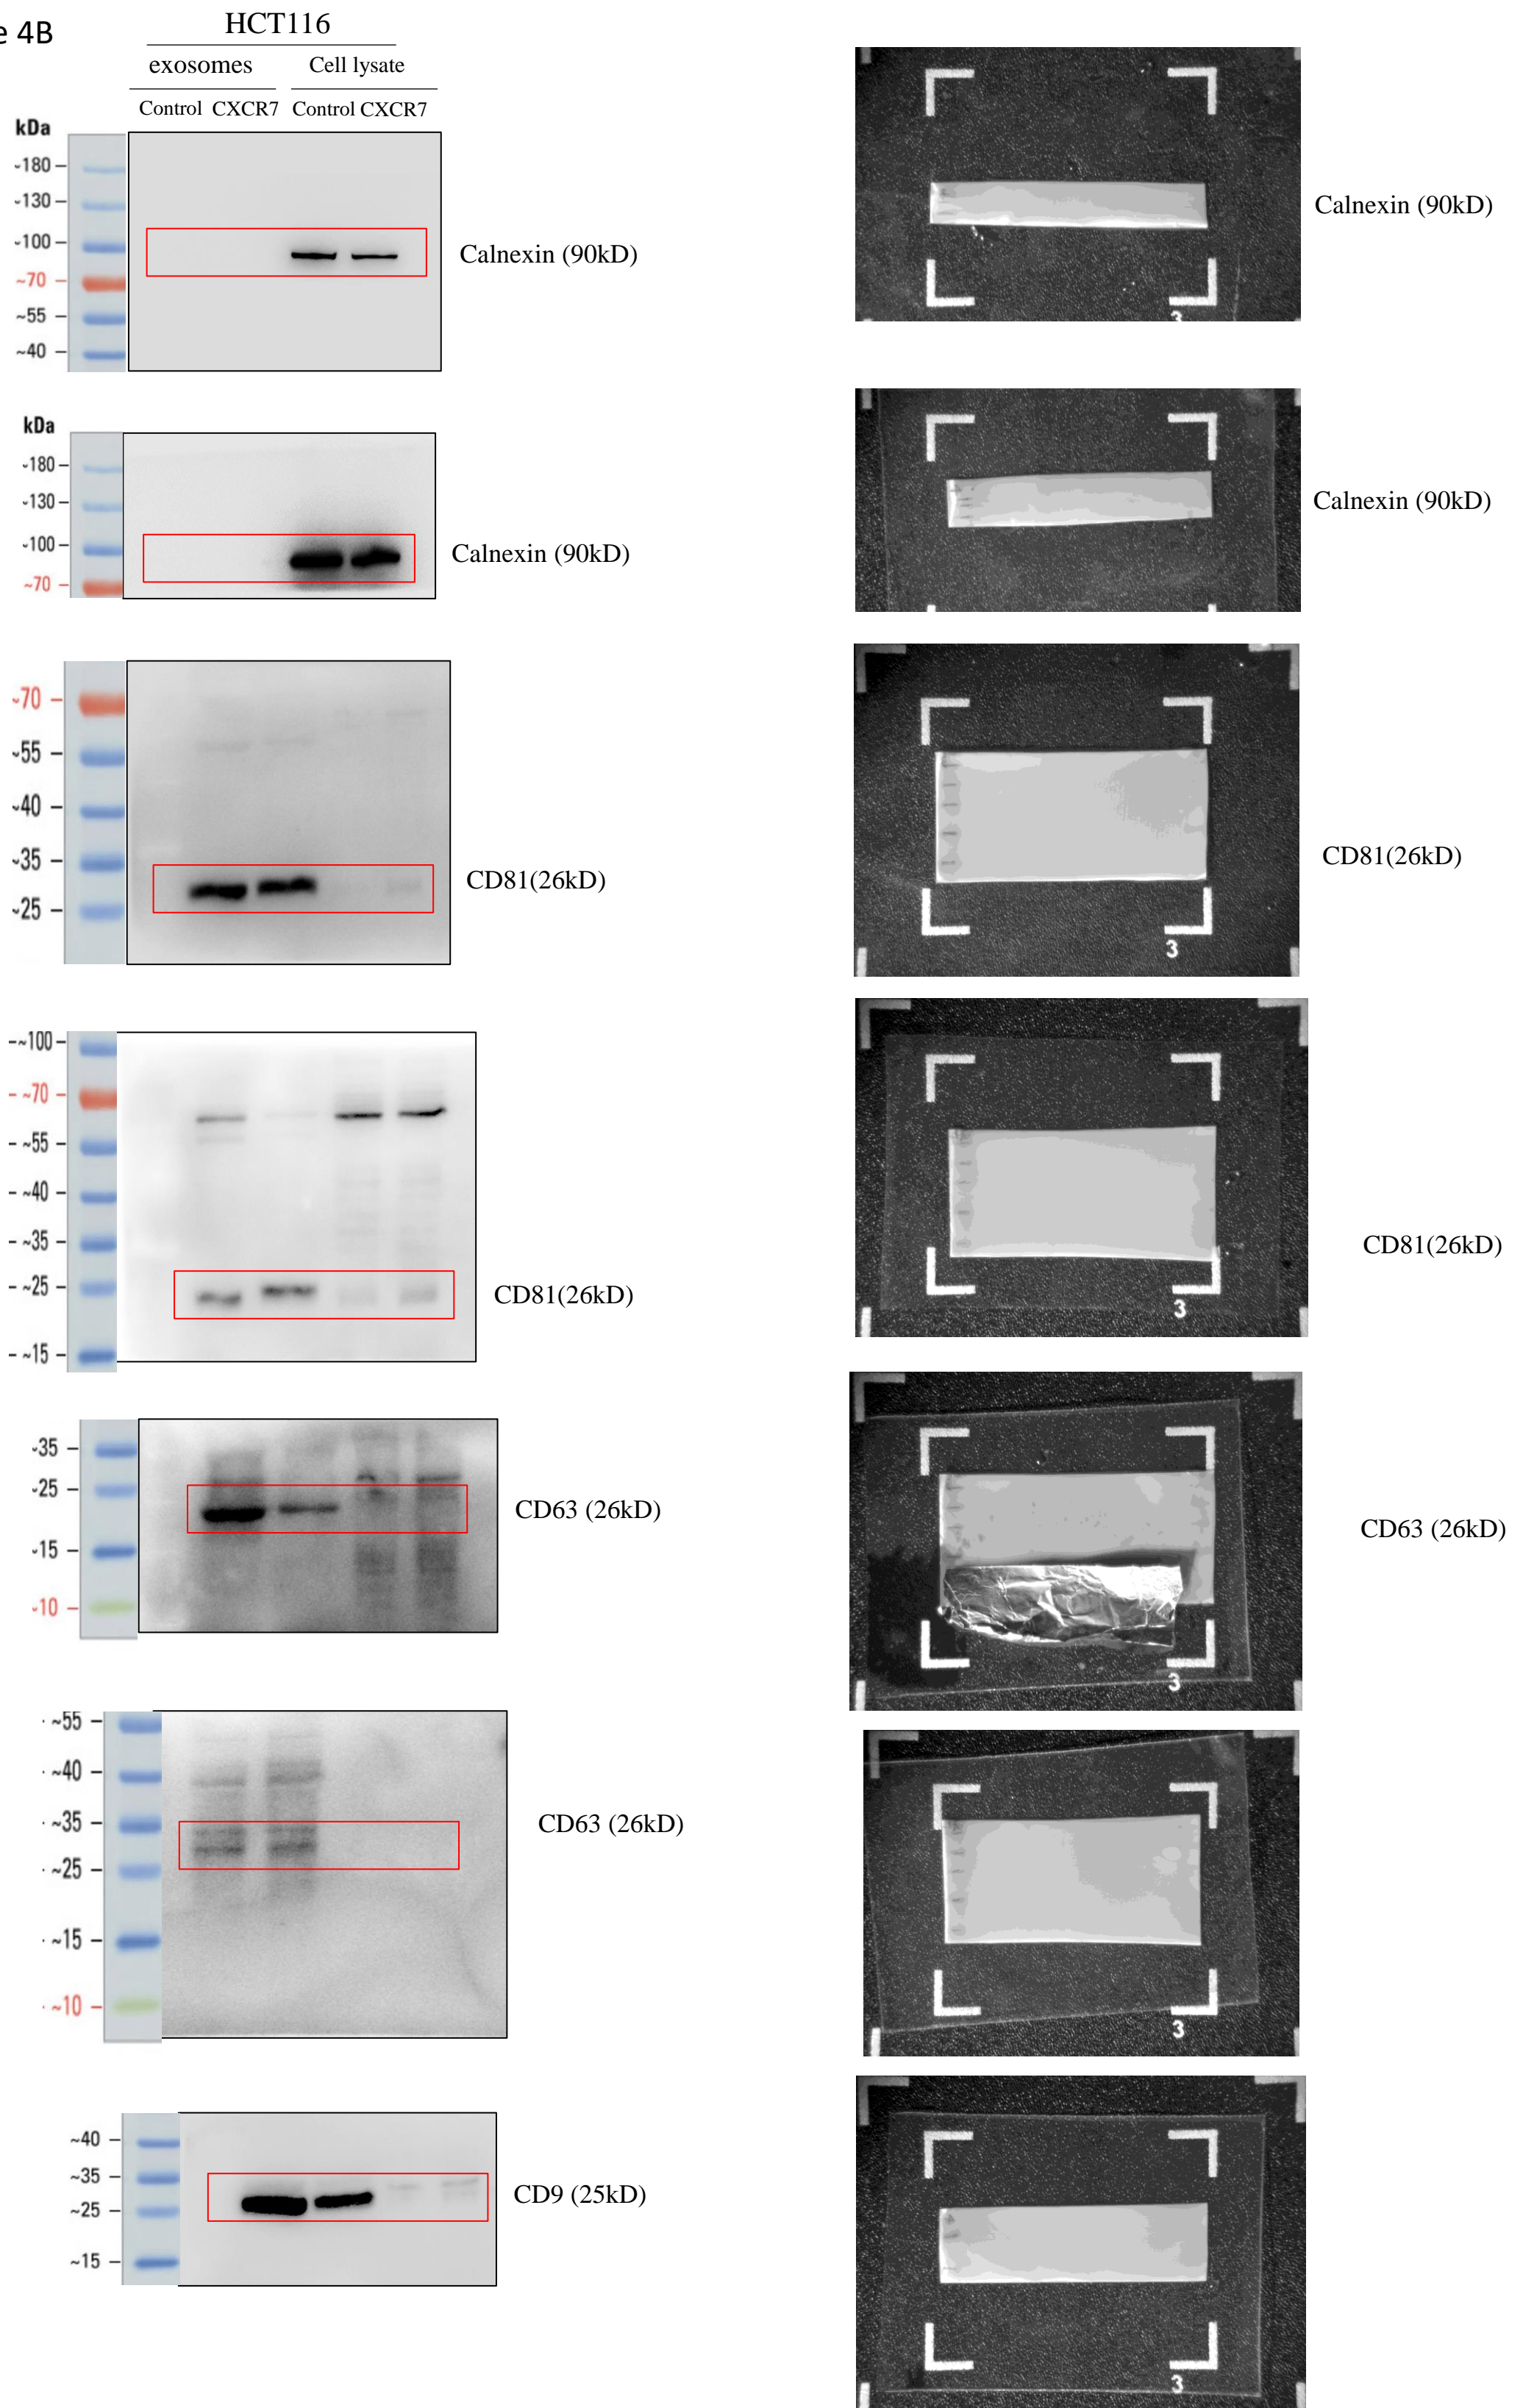



Figure 4H

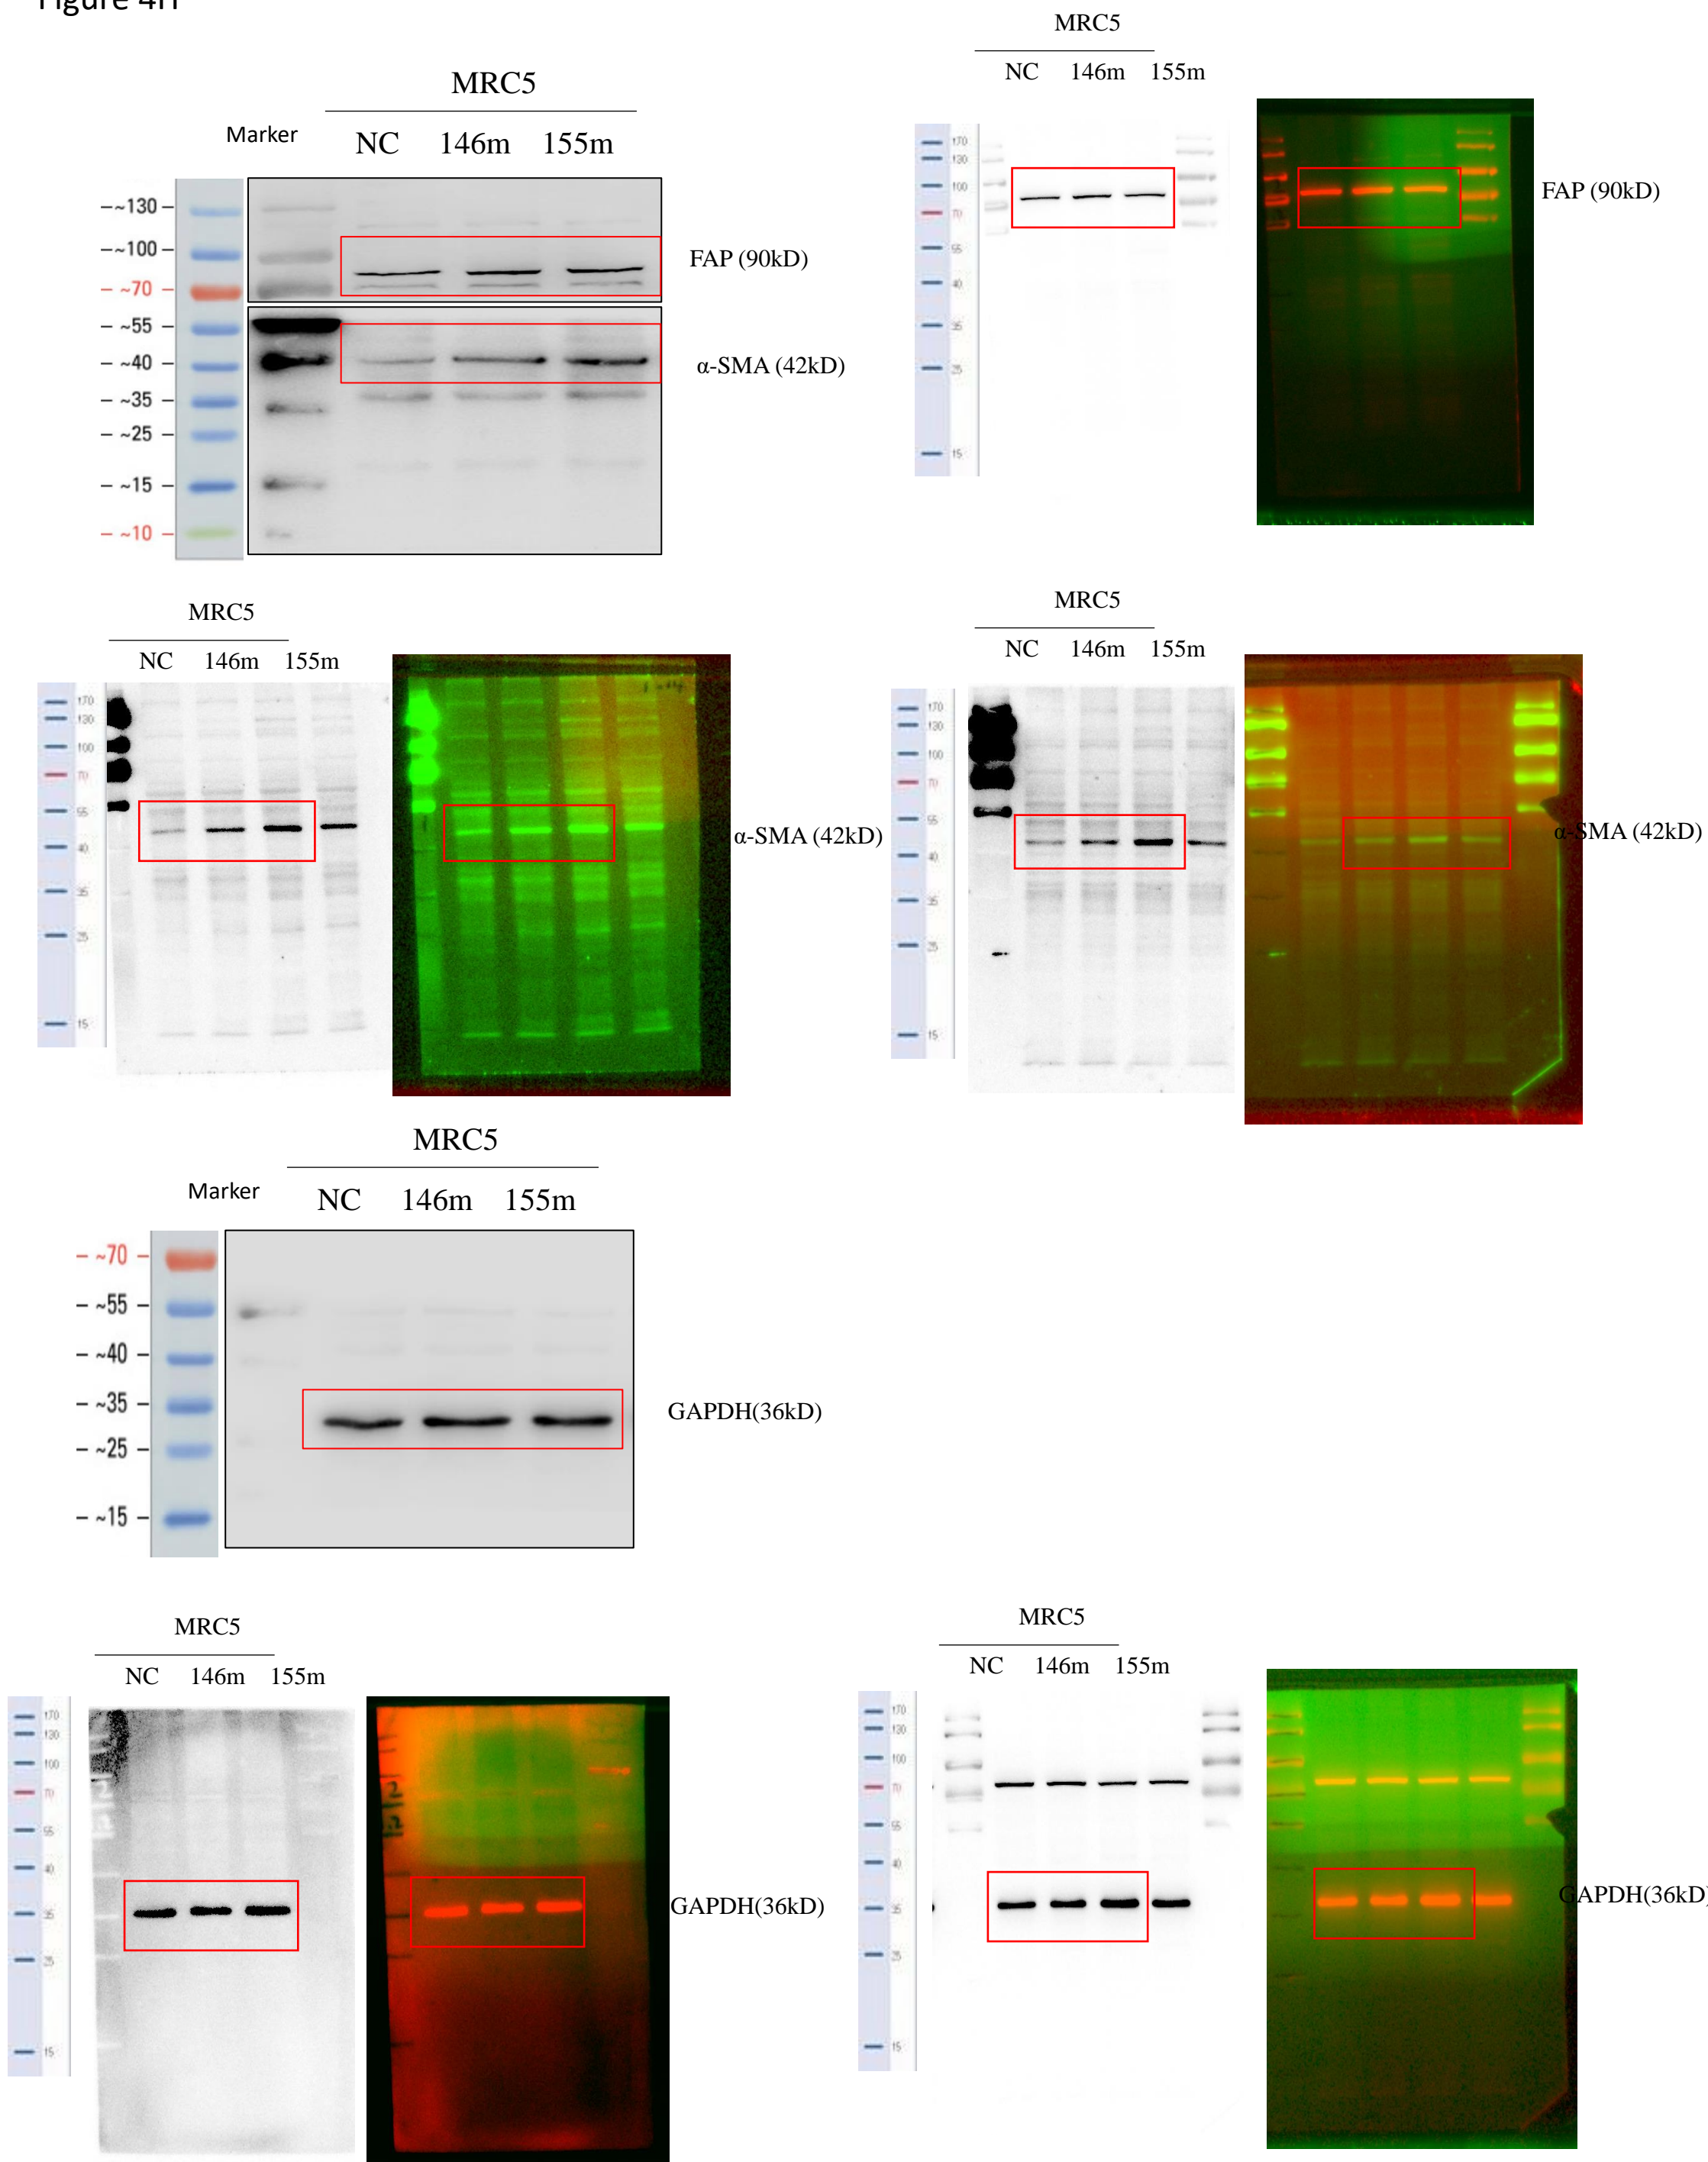



Figure 4J

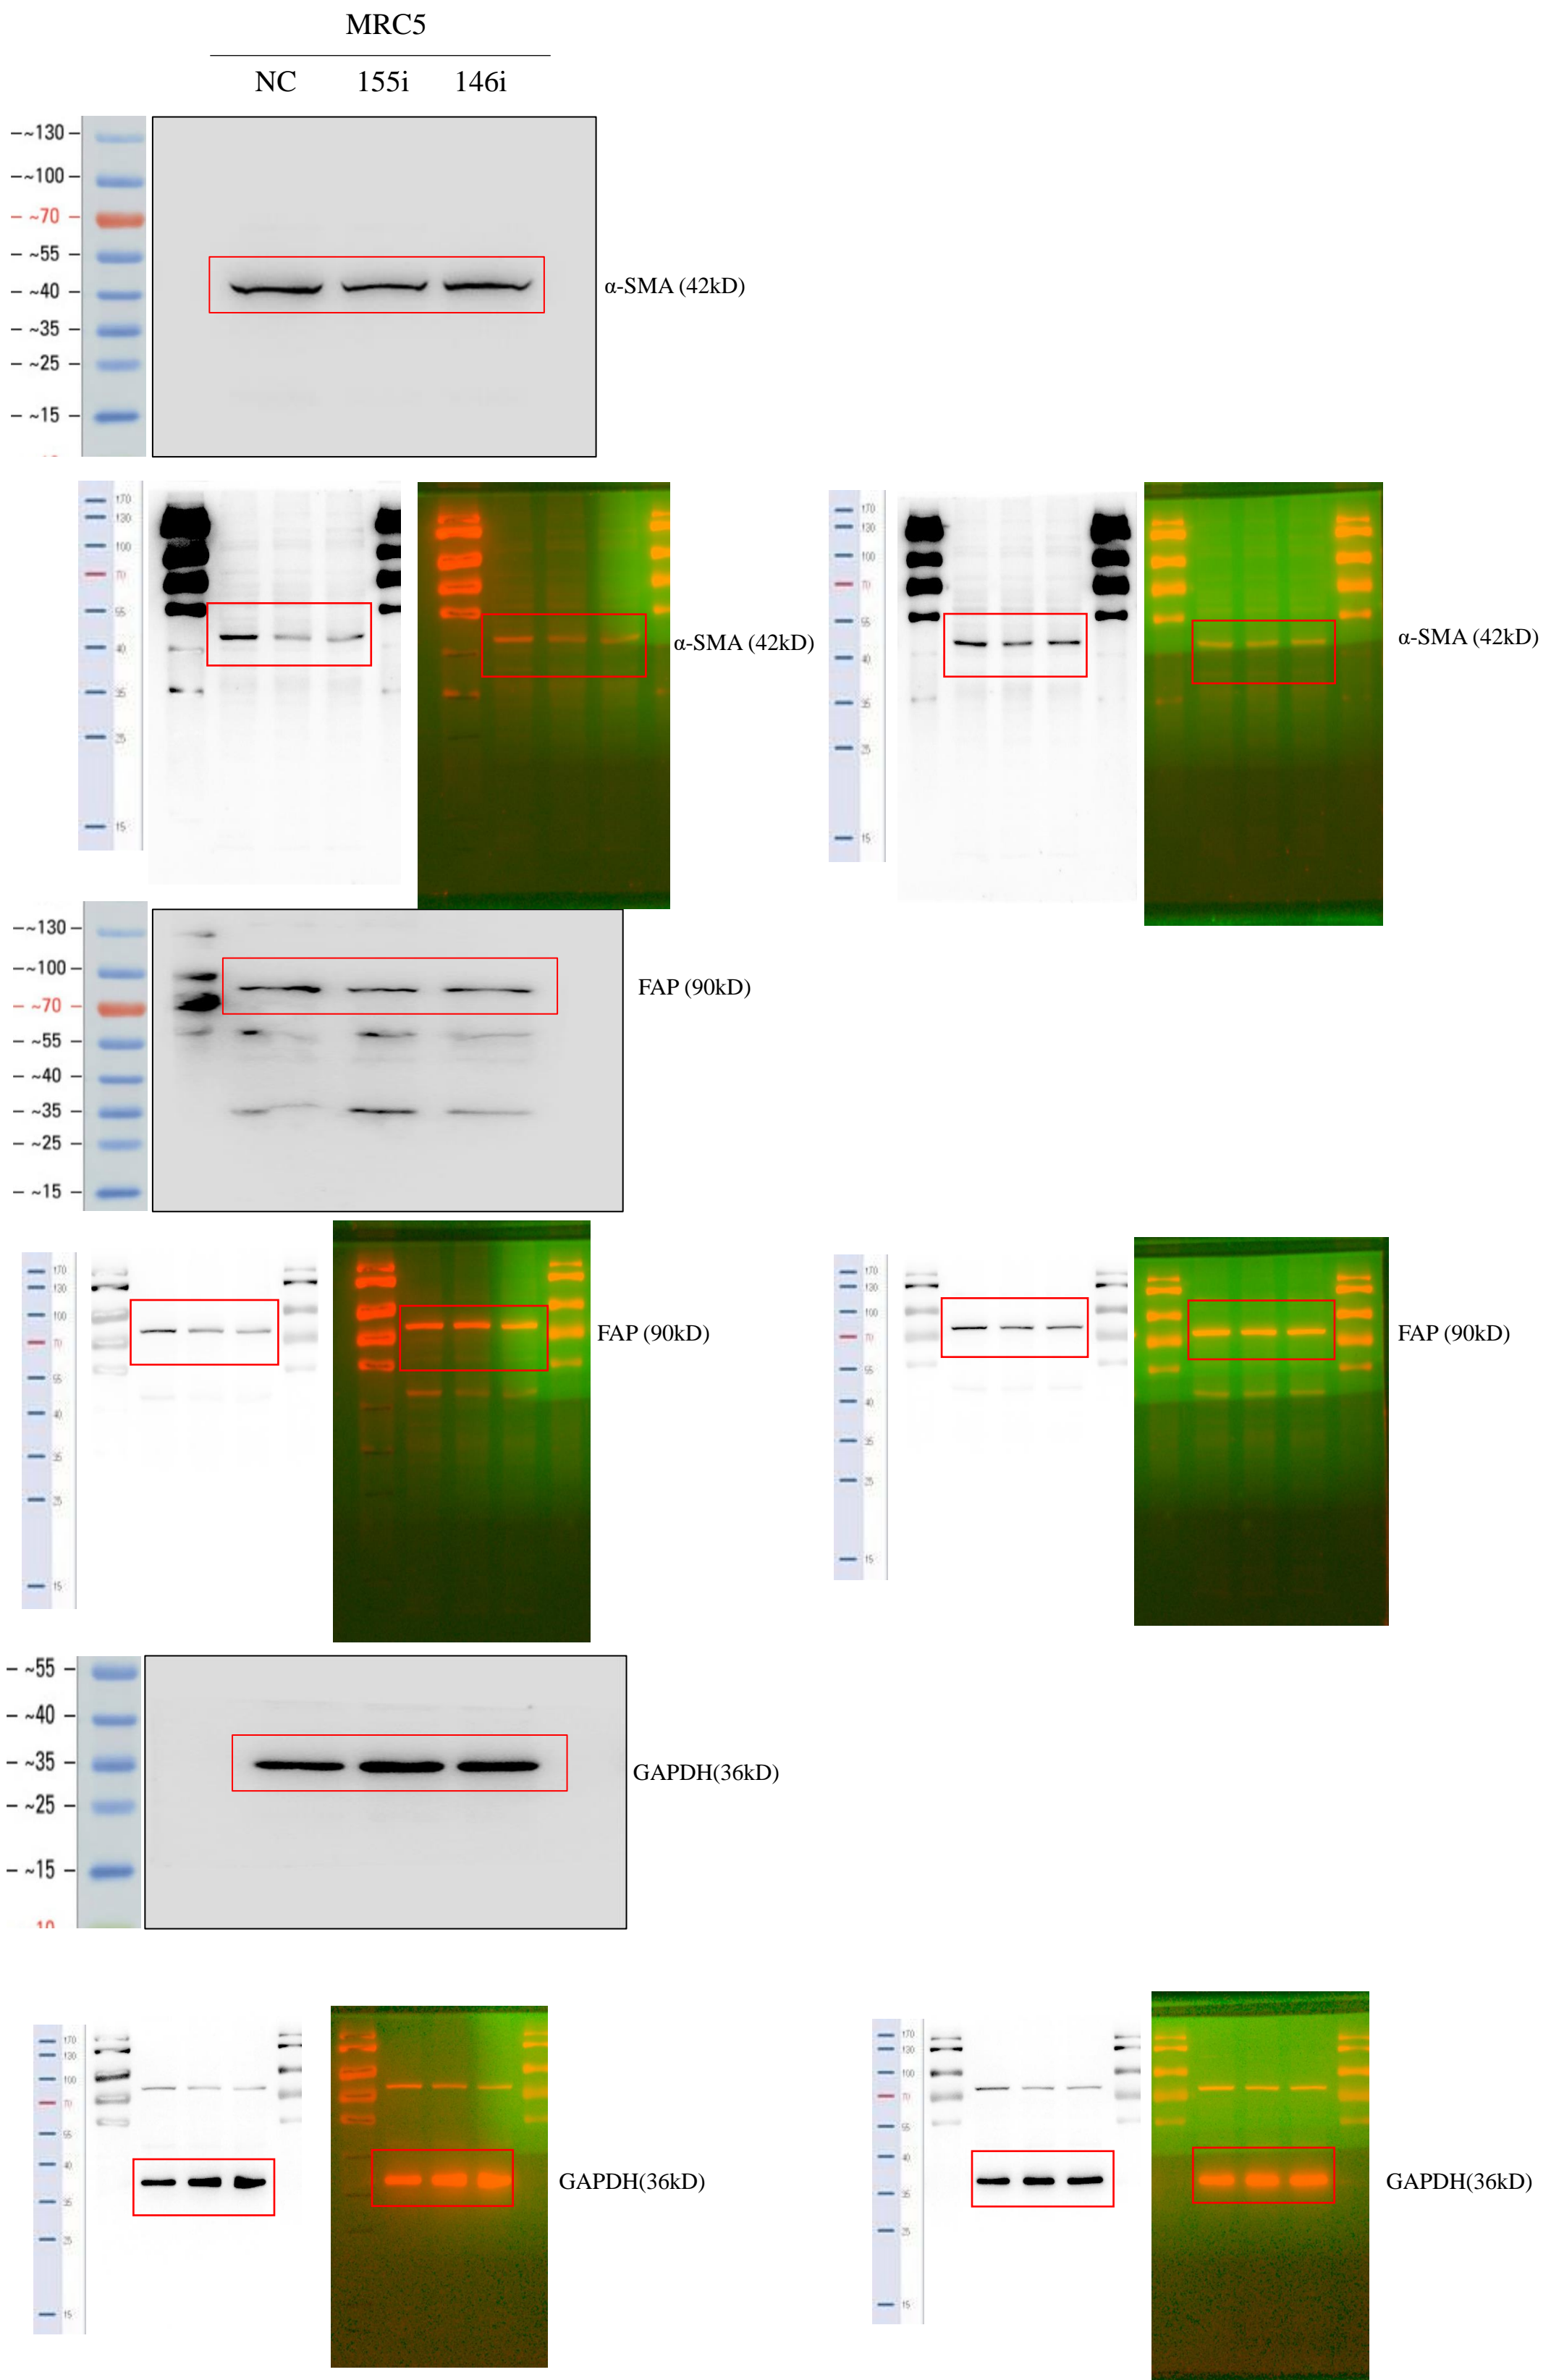



Figure 4L

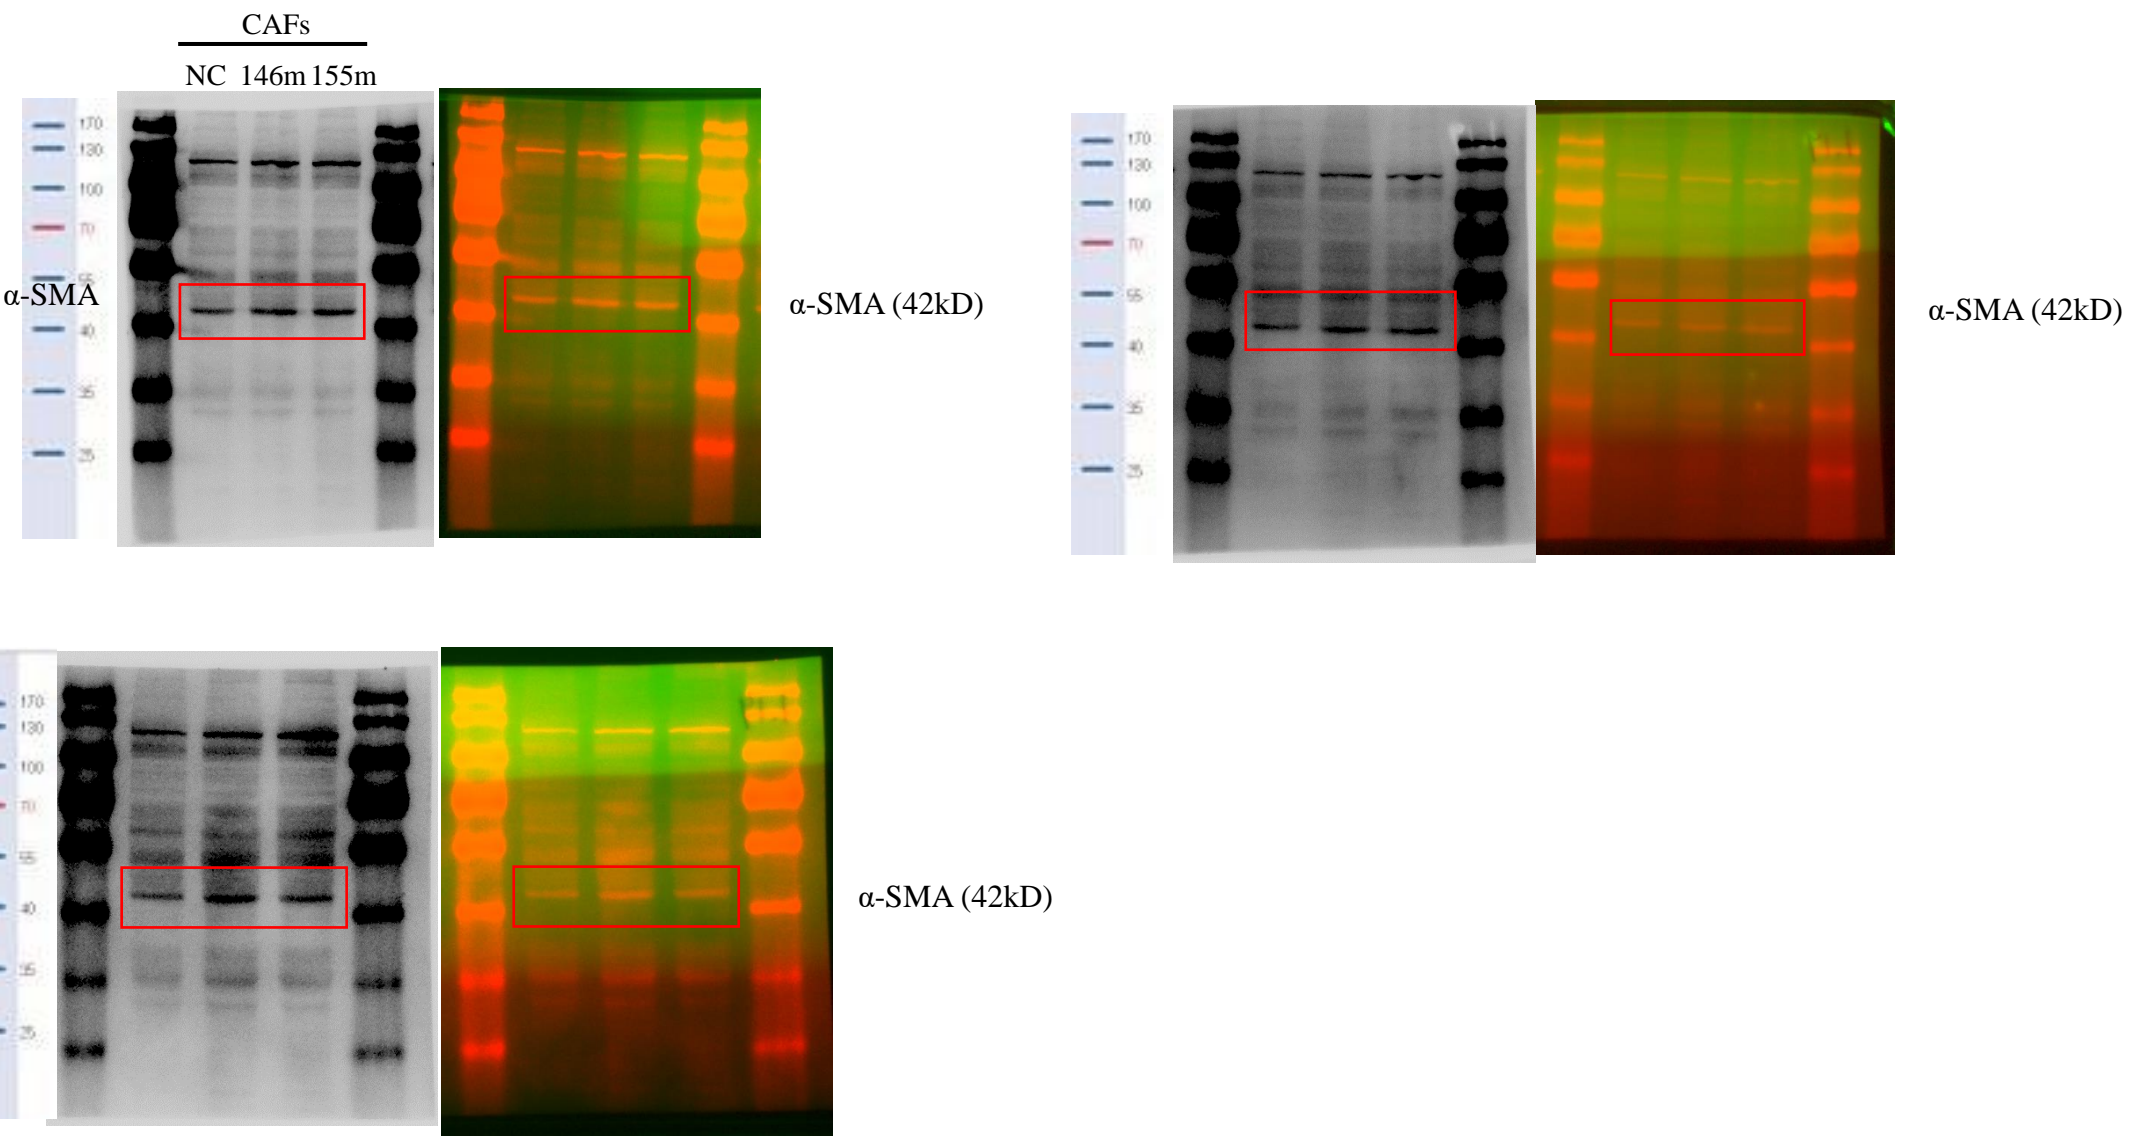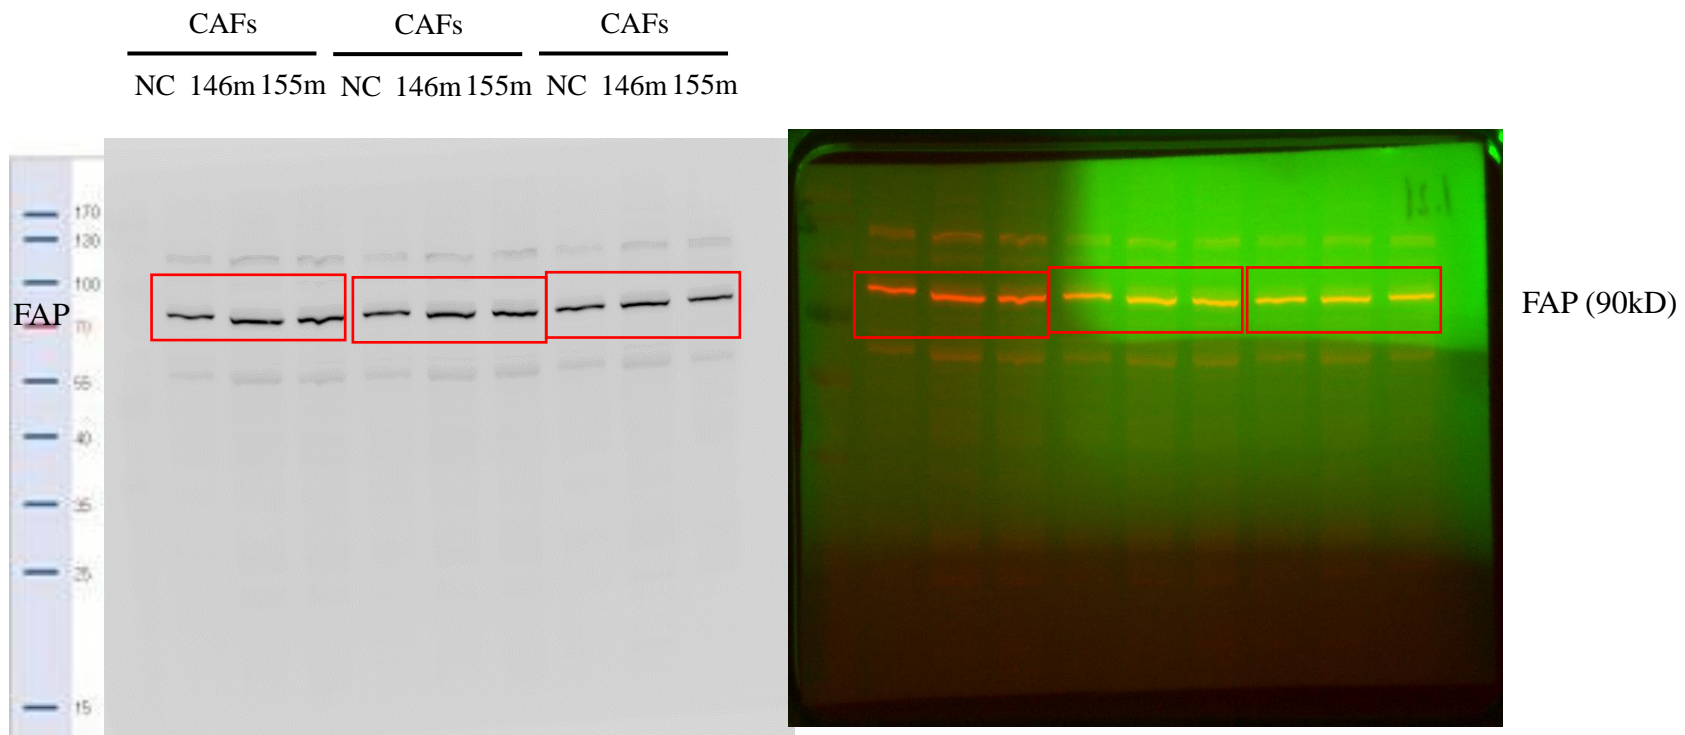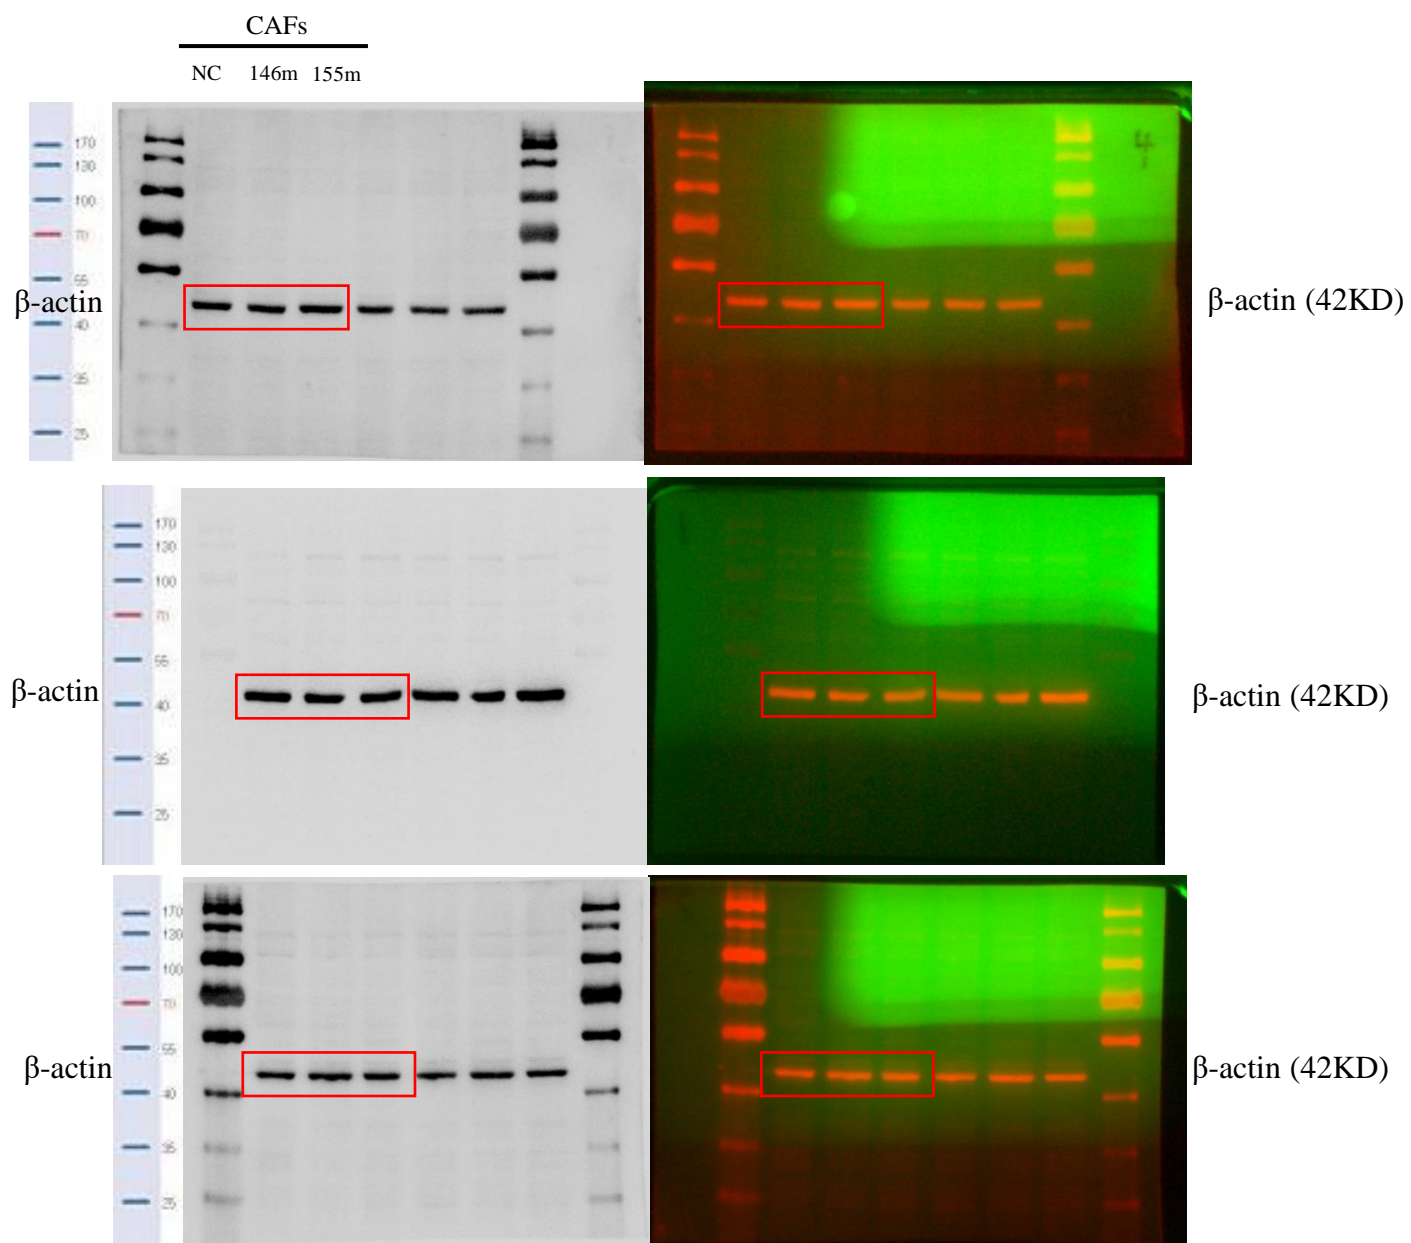



Figure 5D

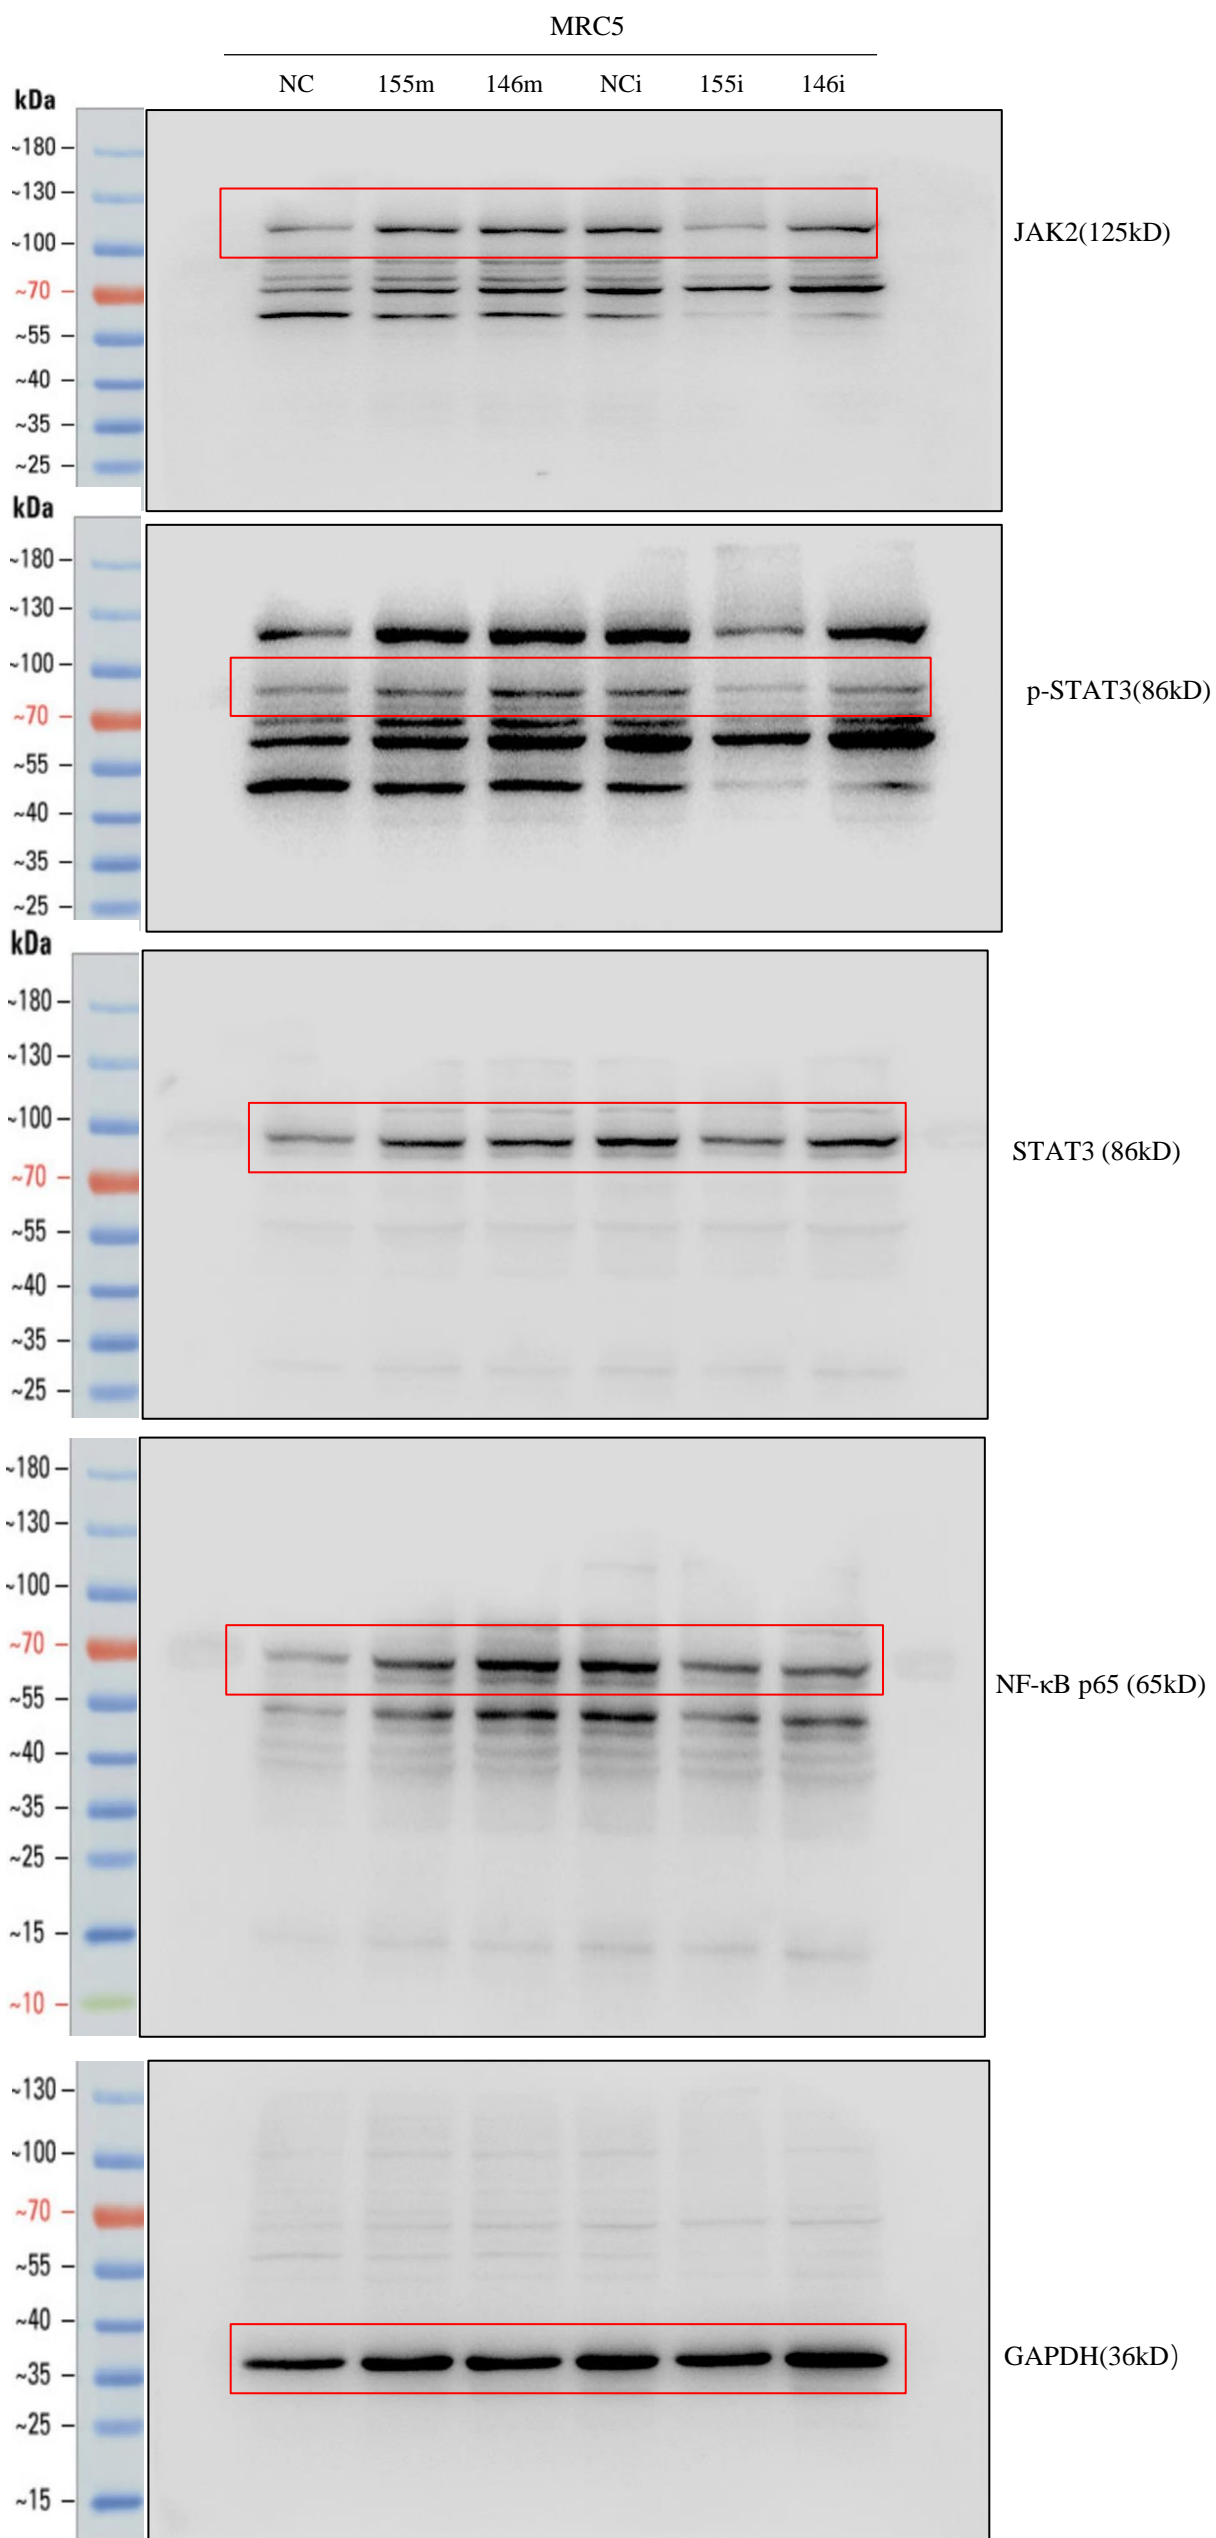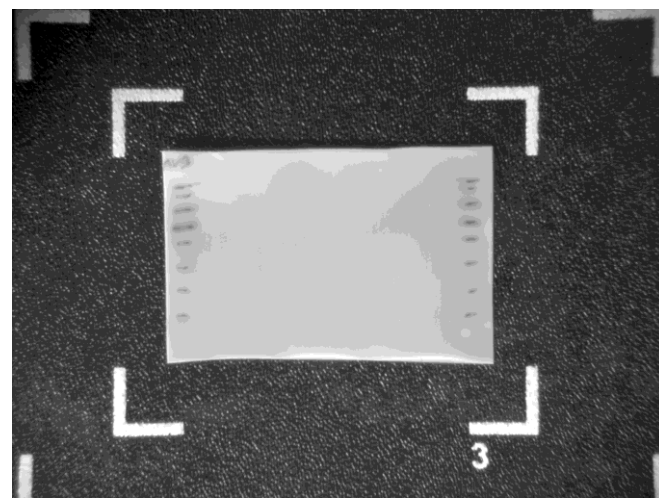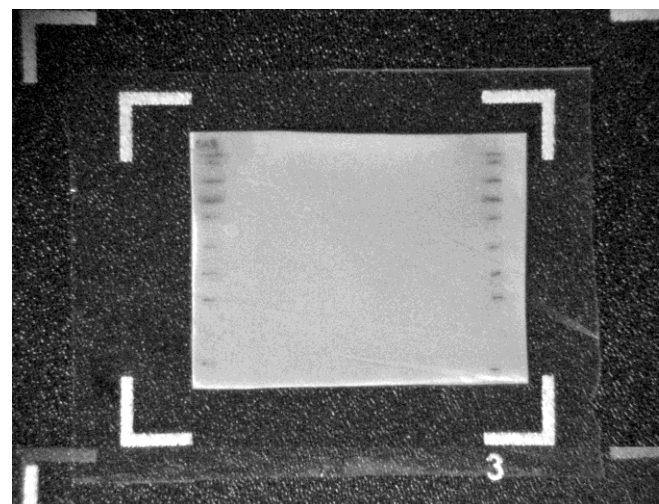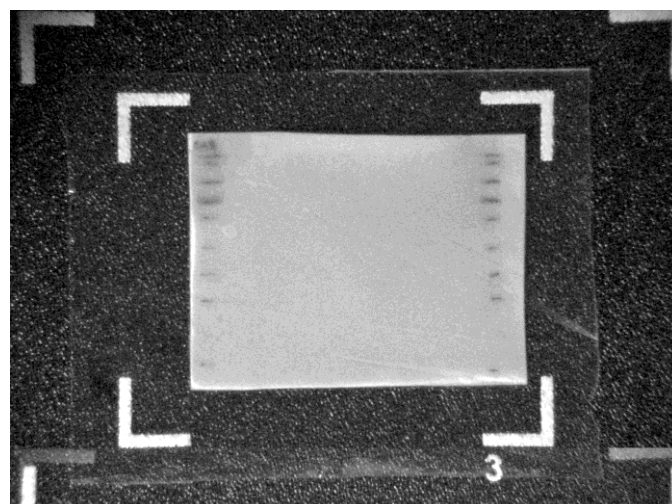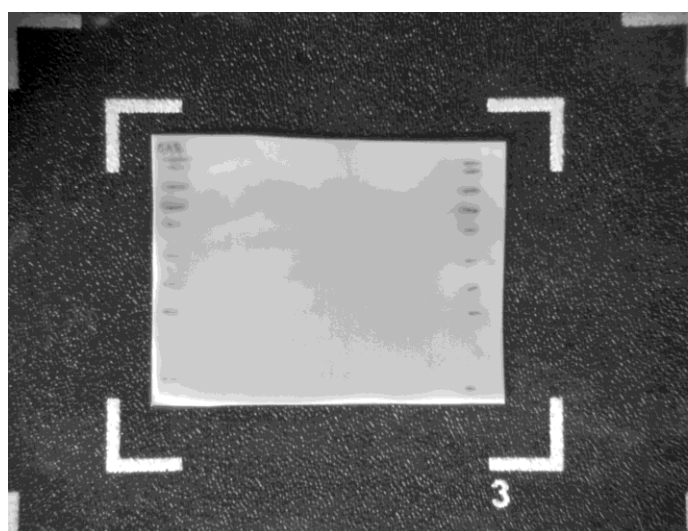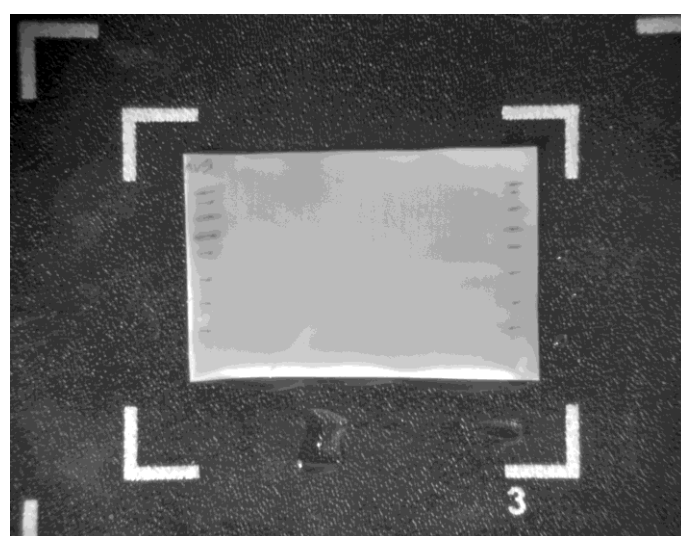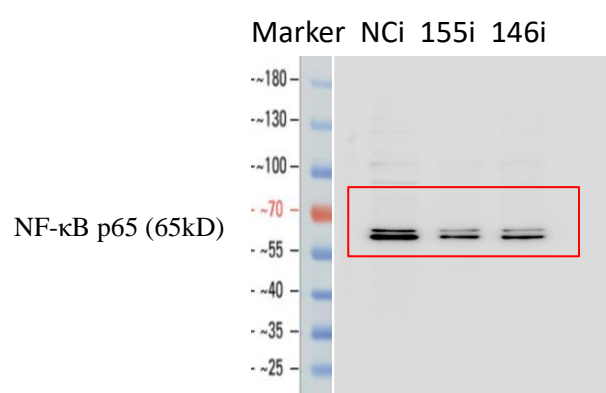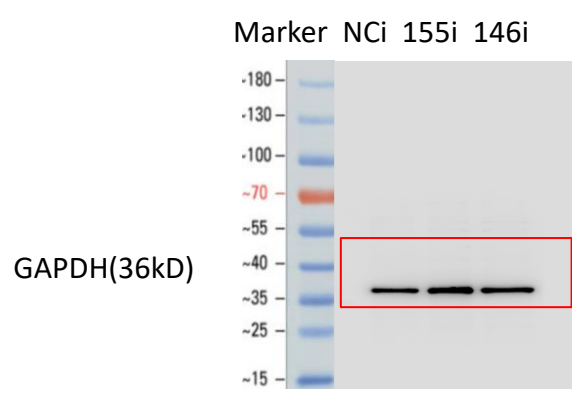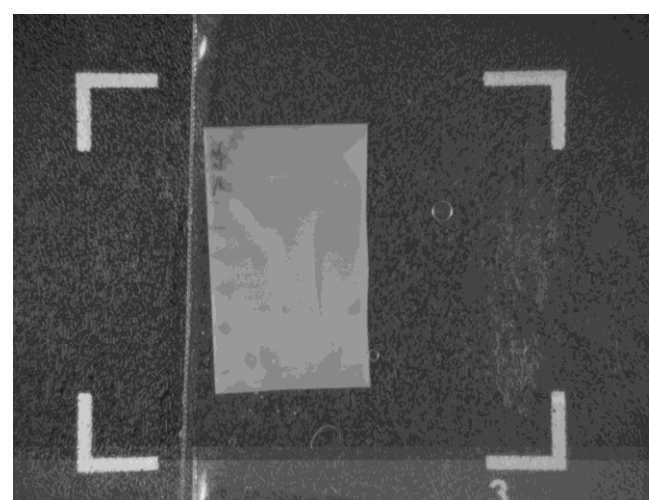



Figure 5D

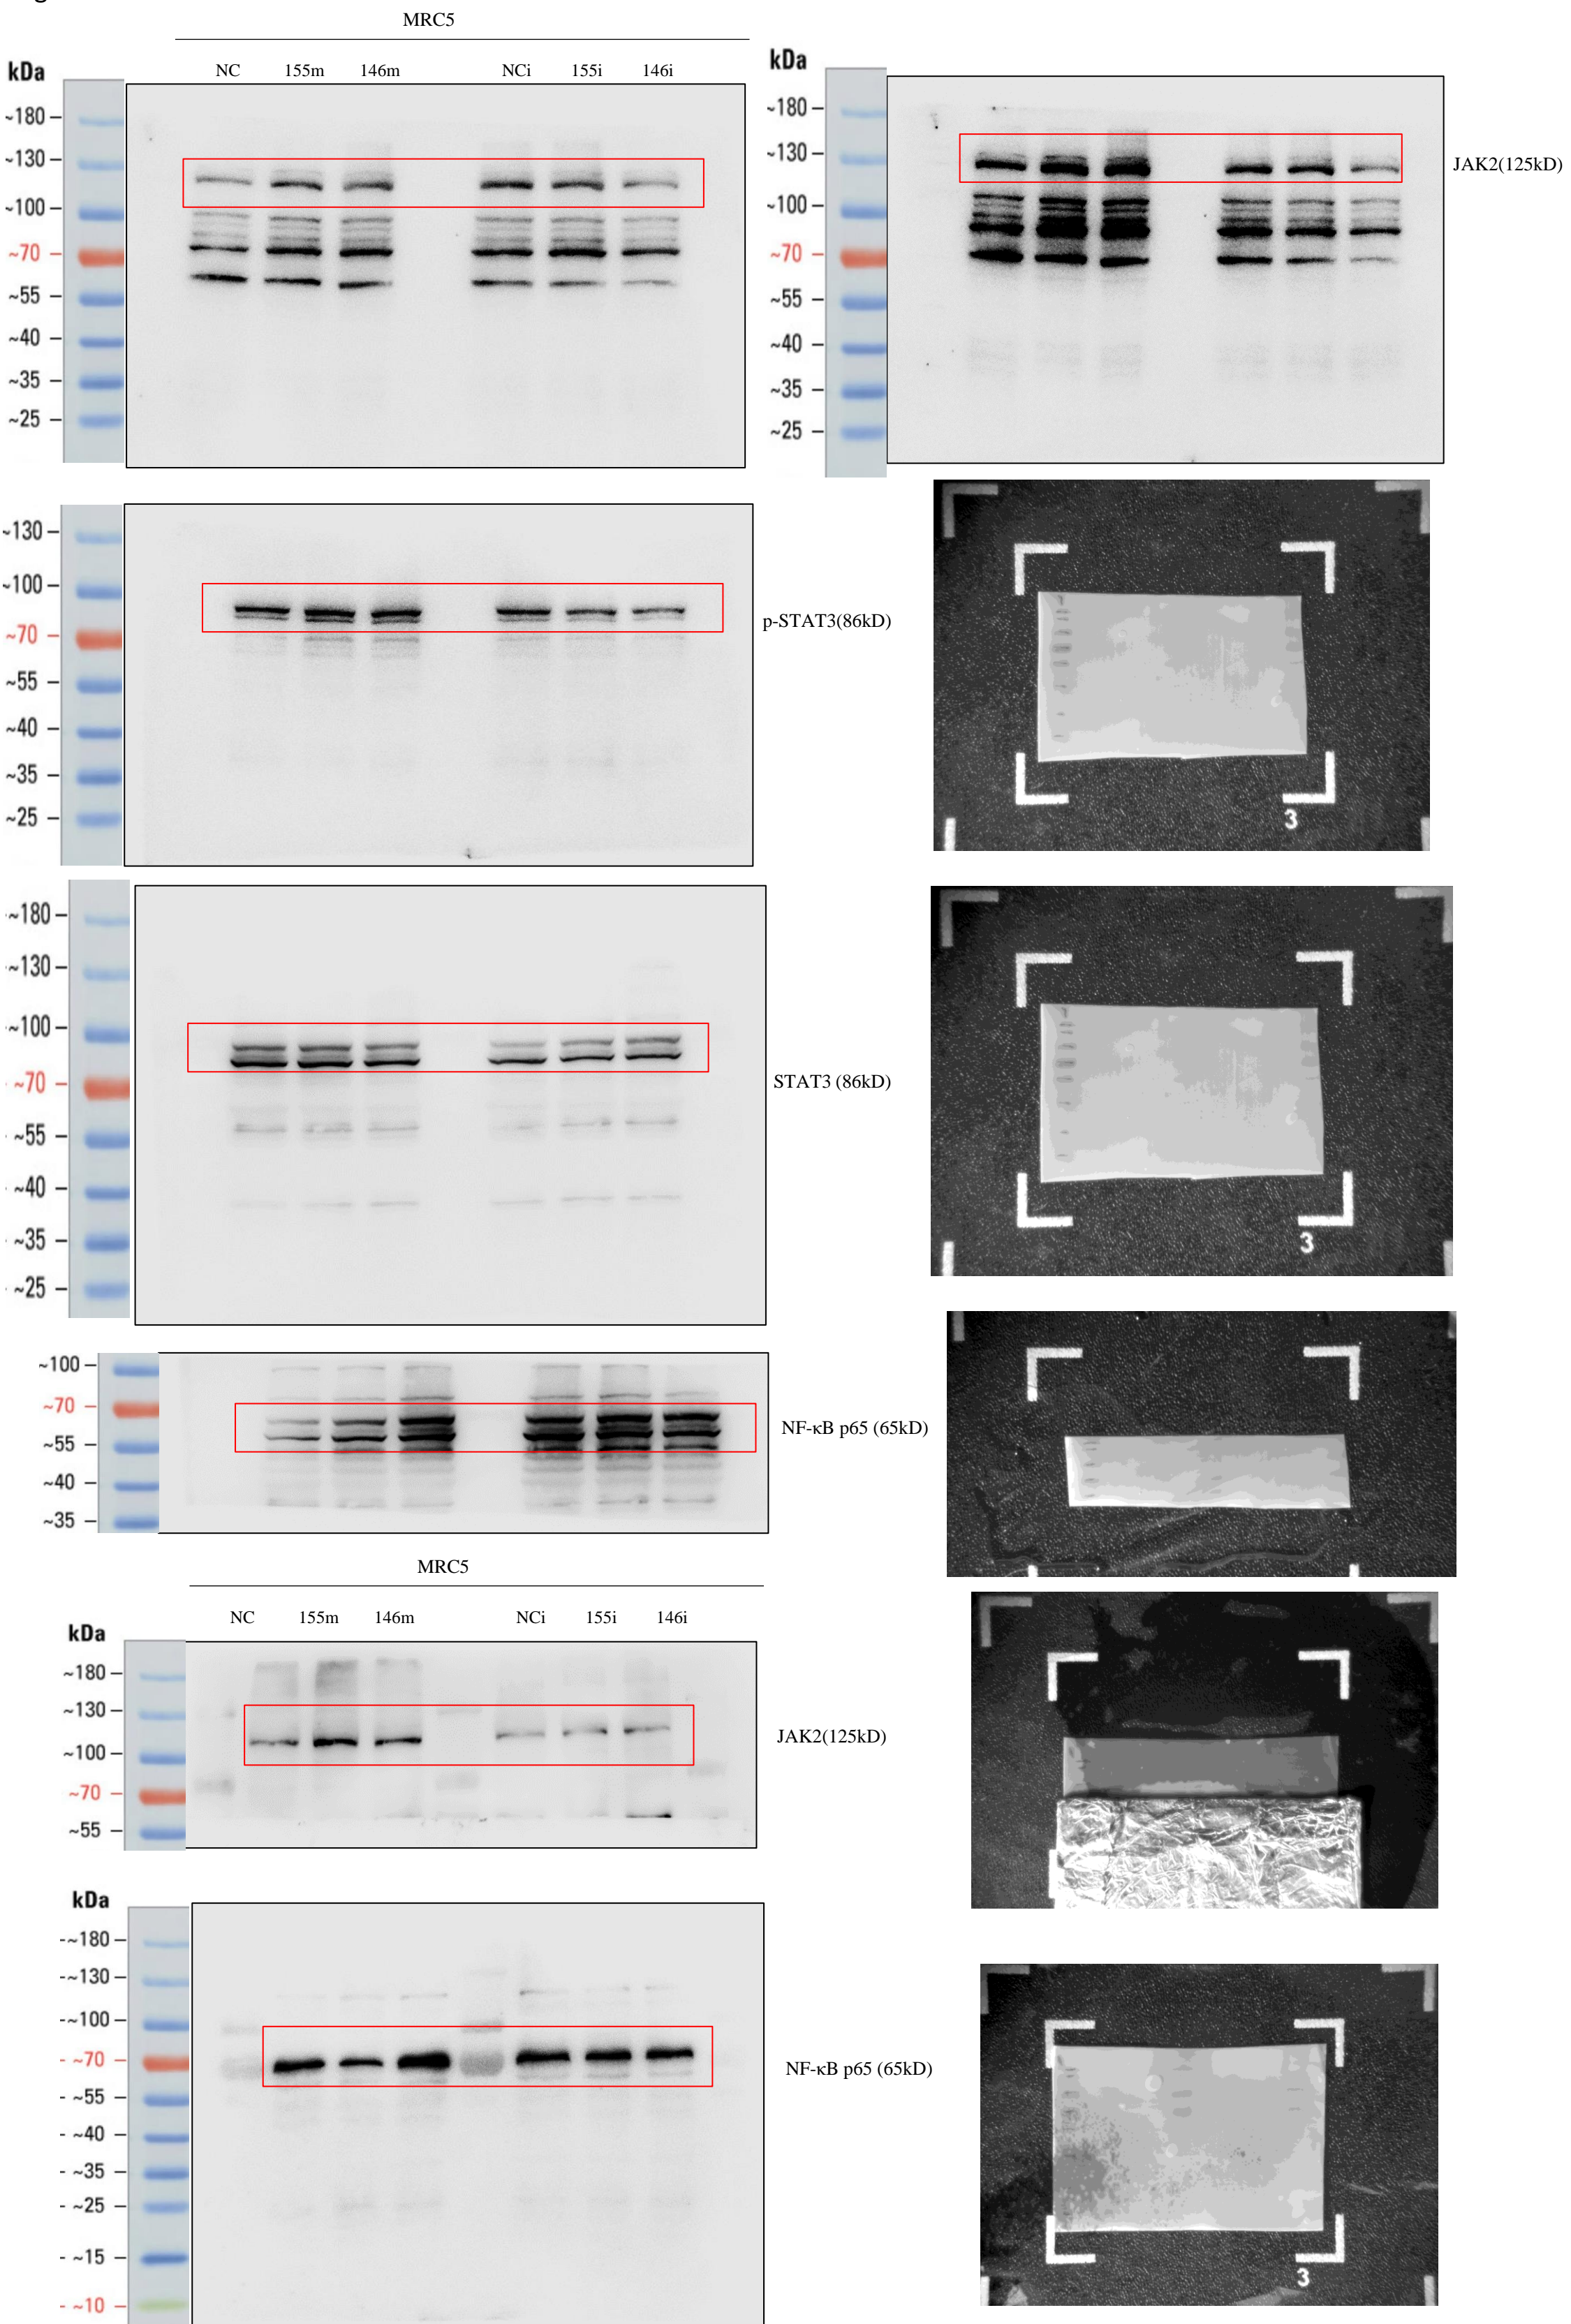



Marker NC 155m 146m NCi 155i 146i

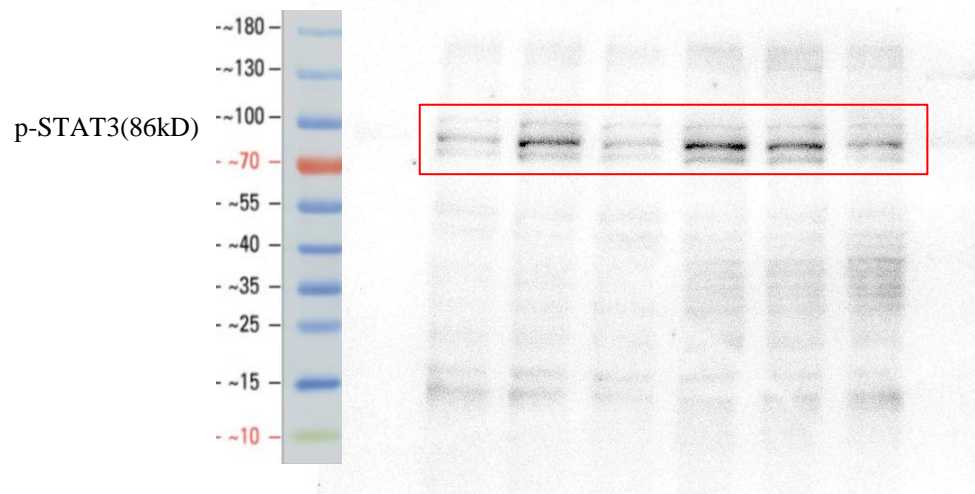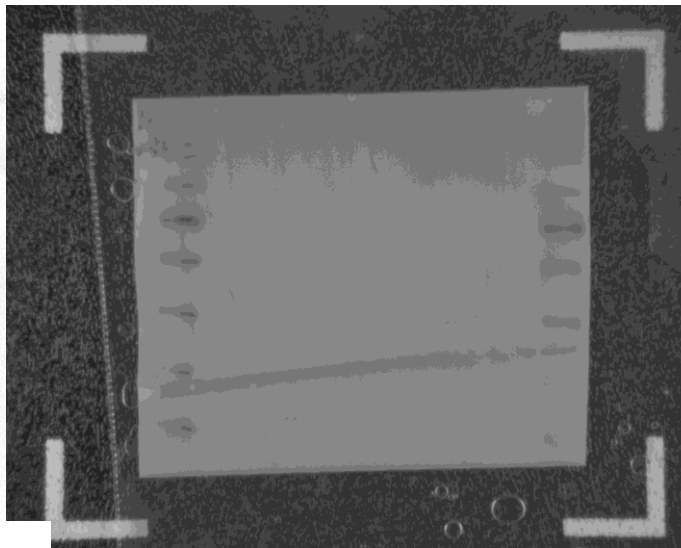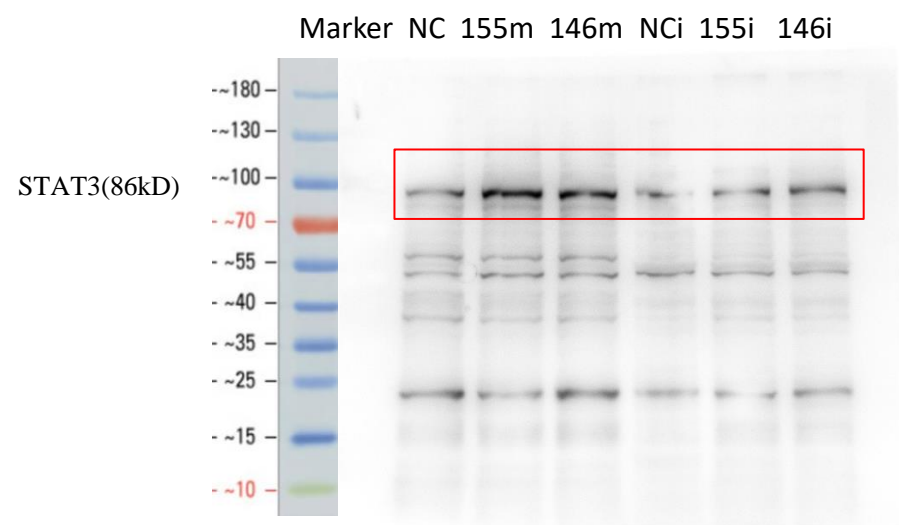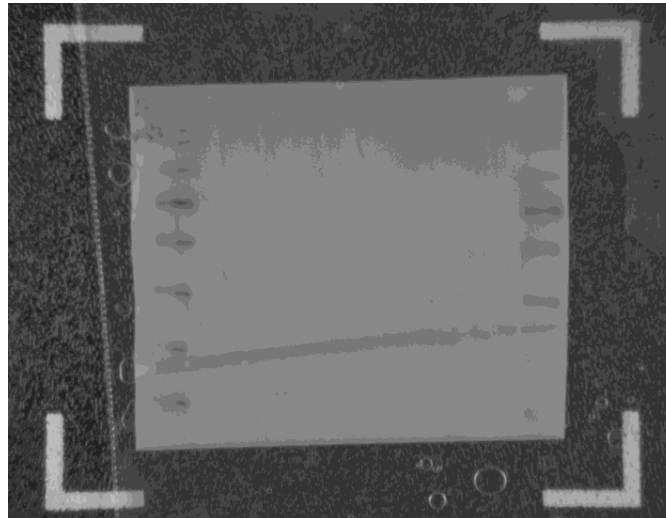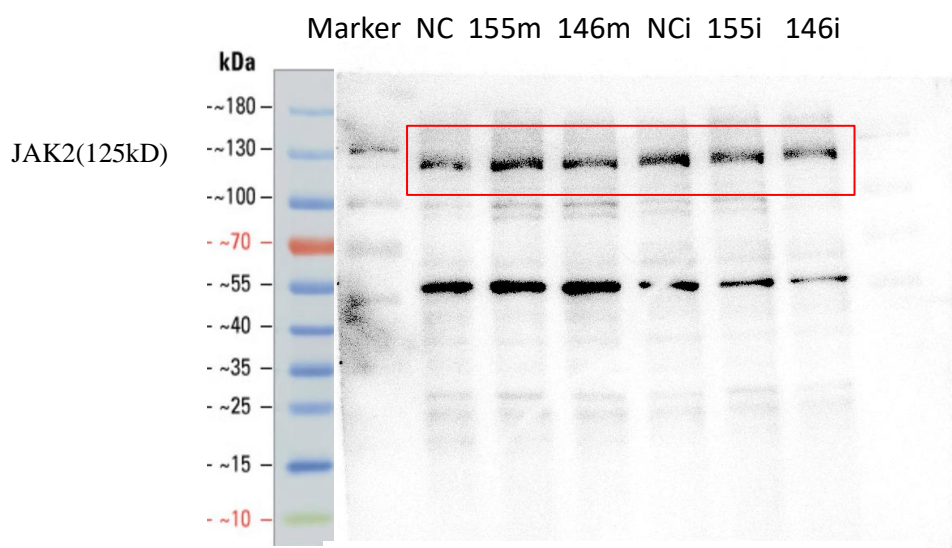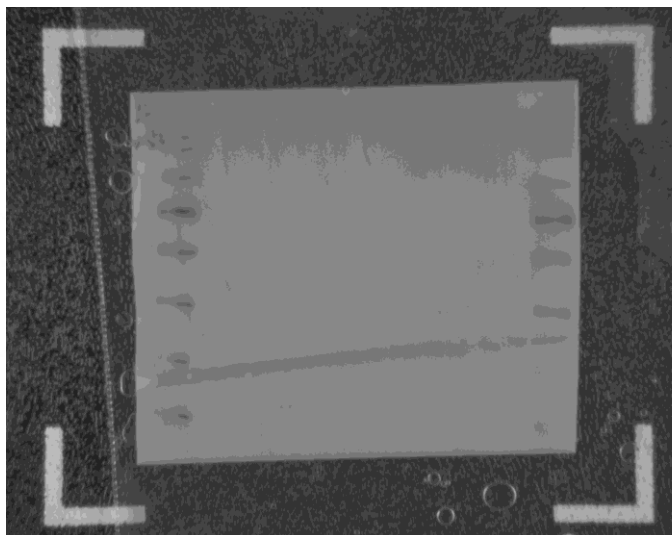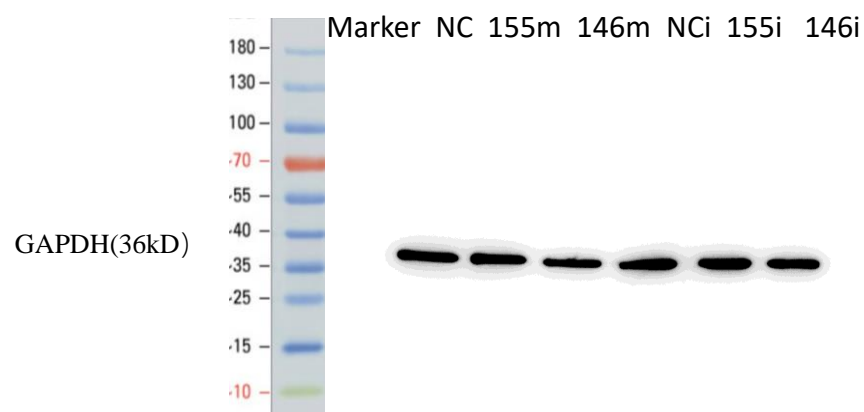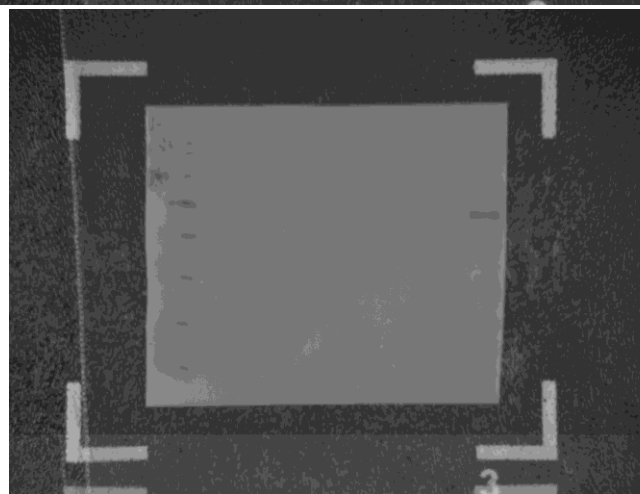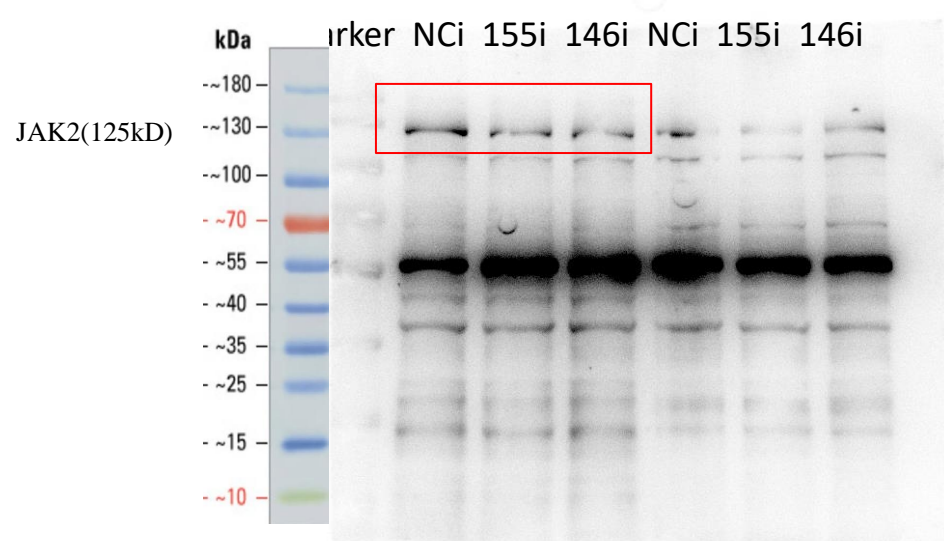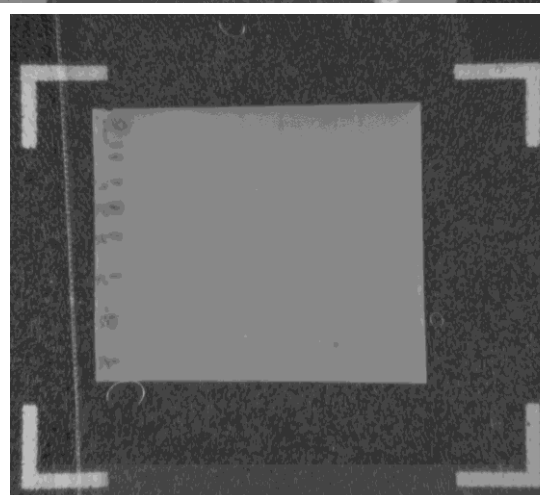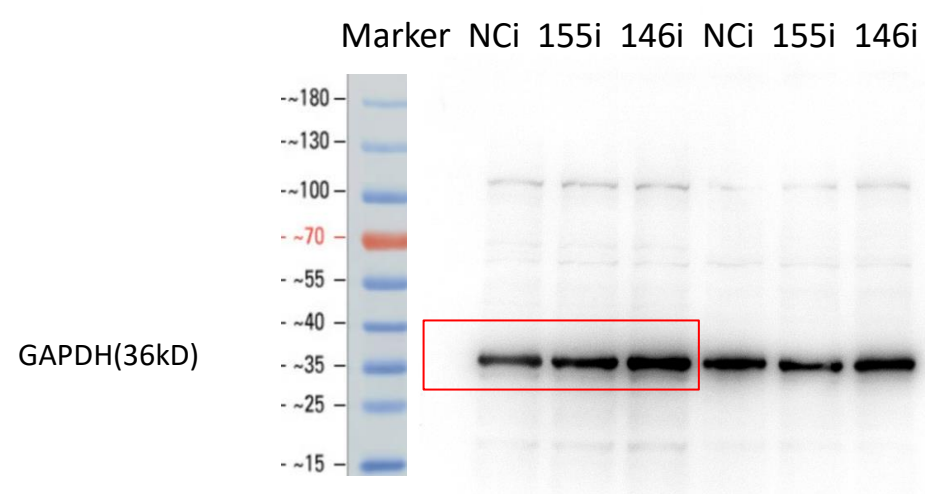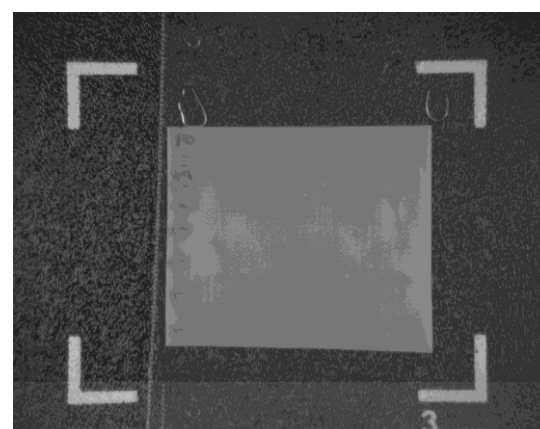



Figure 5E

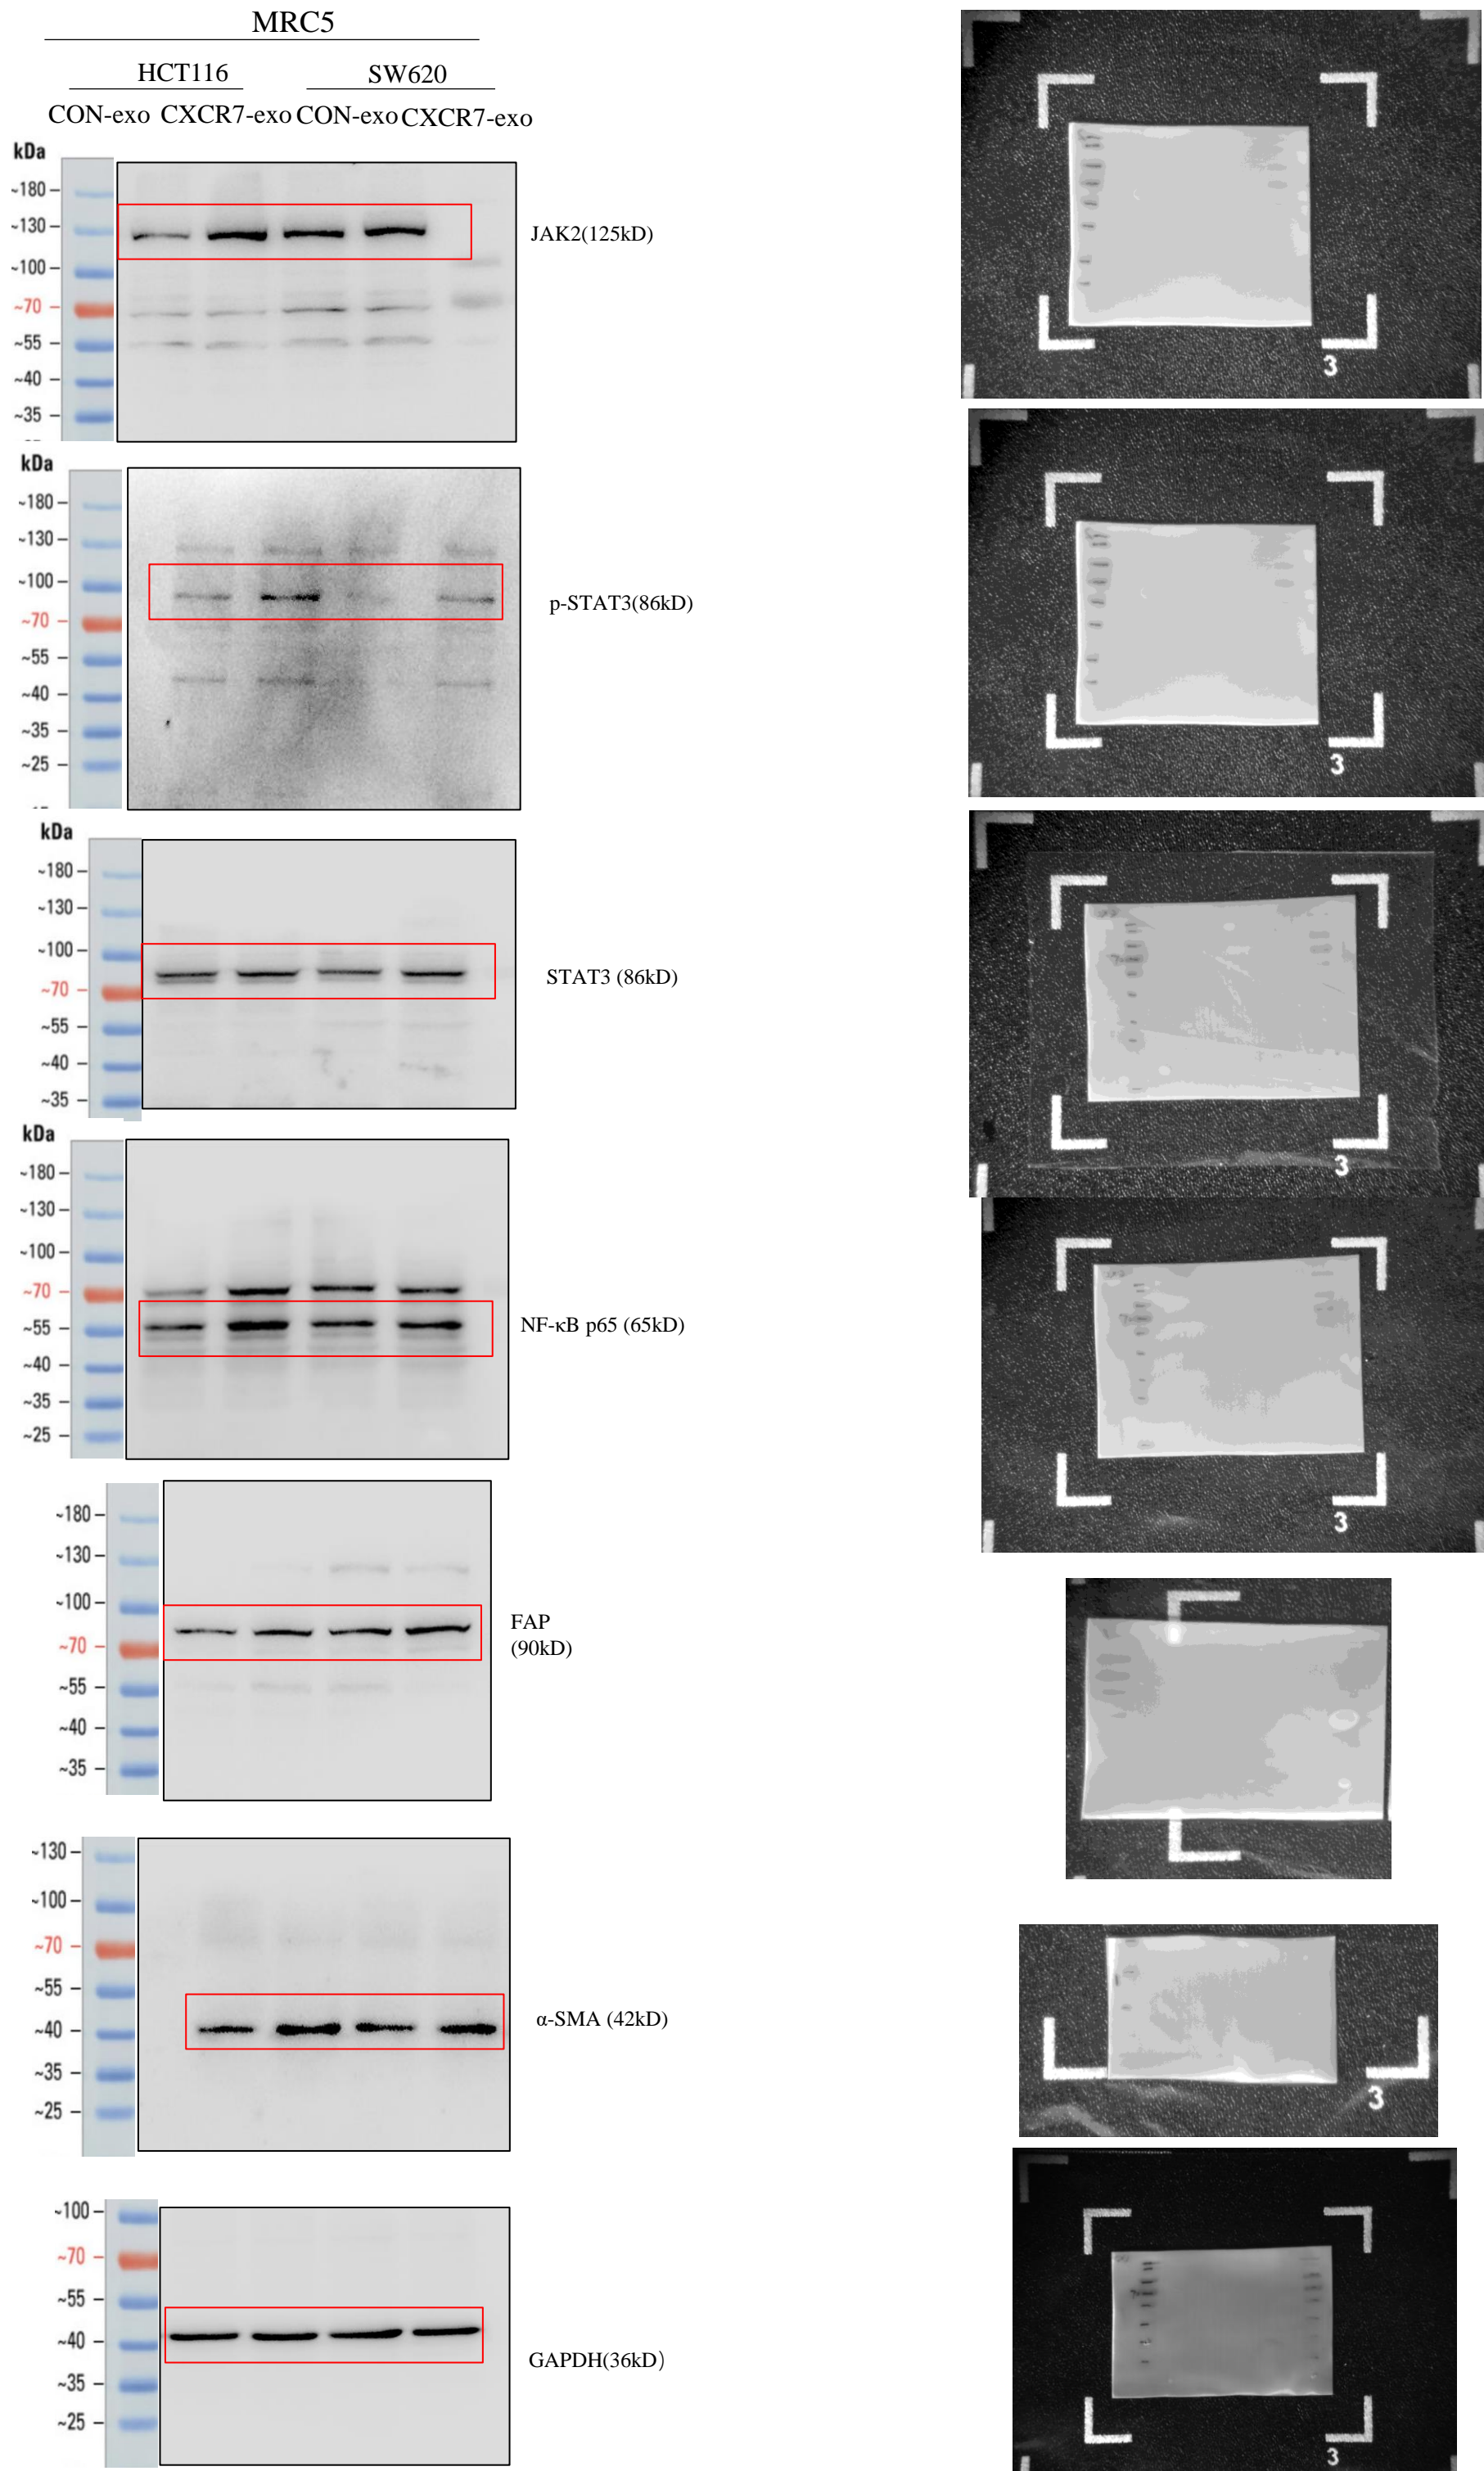



Figure 5E

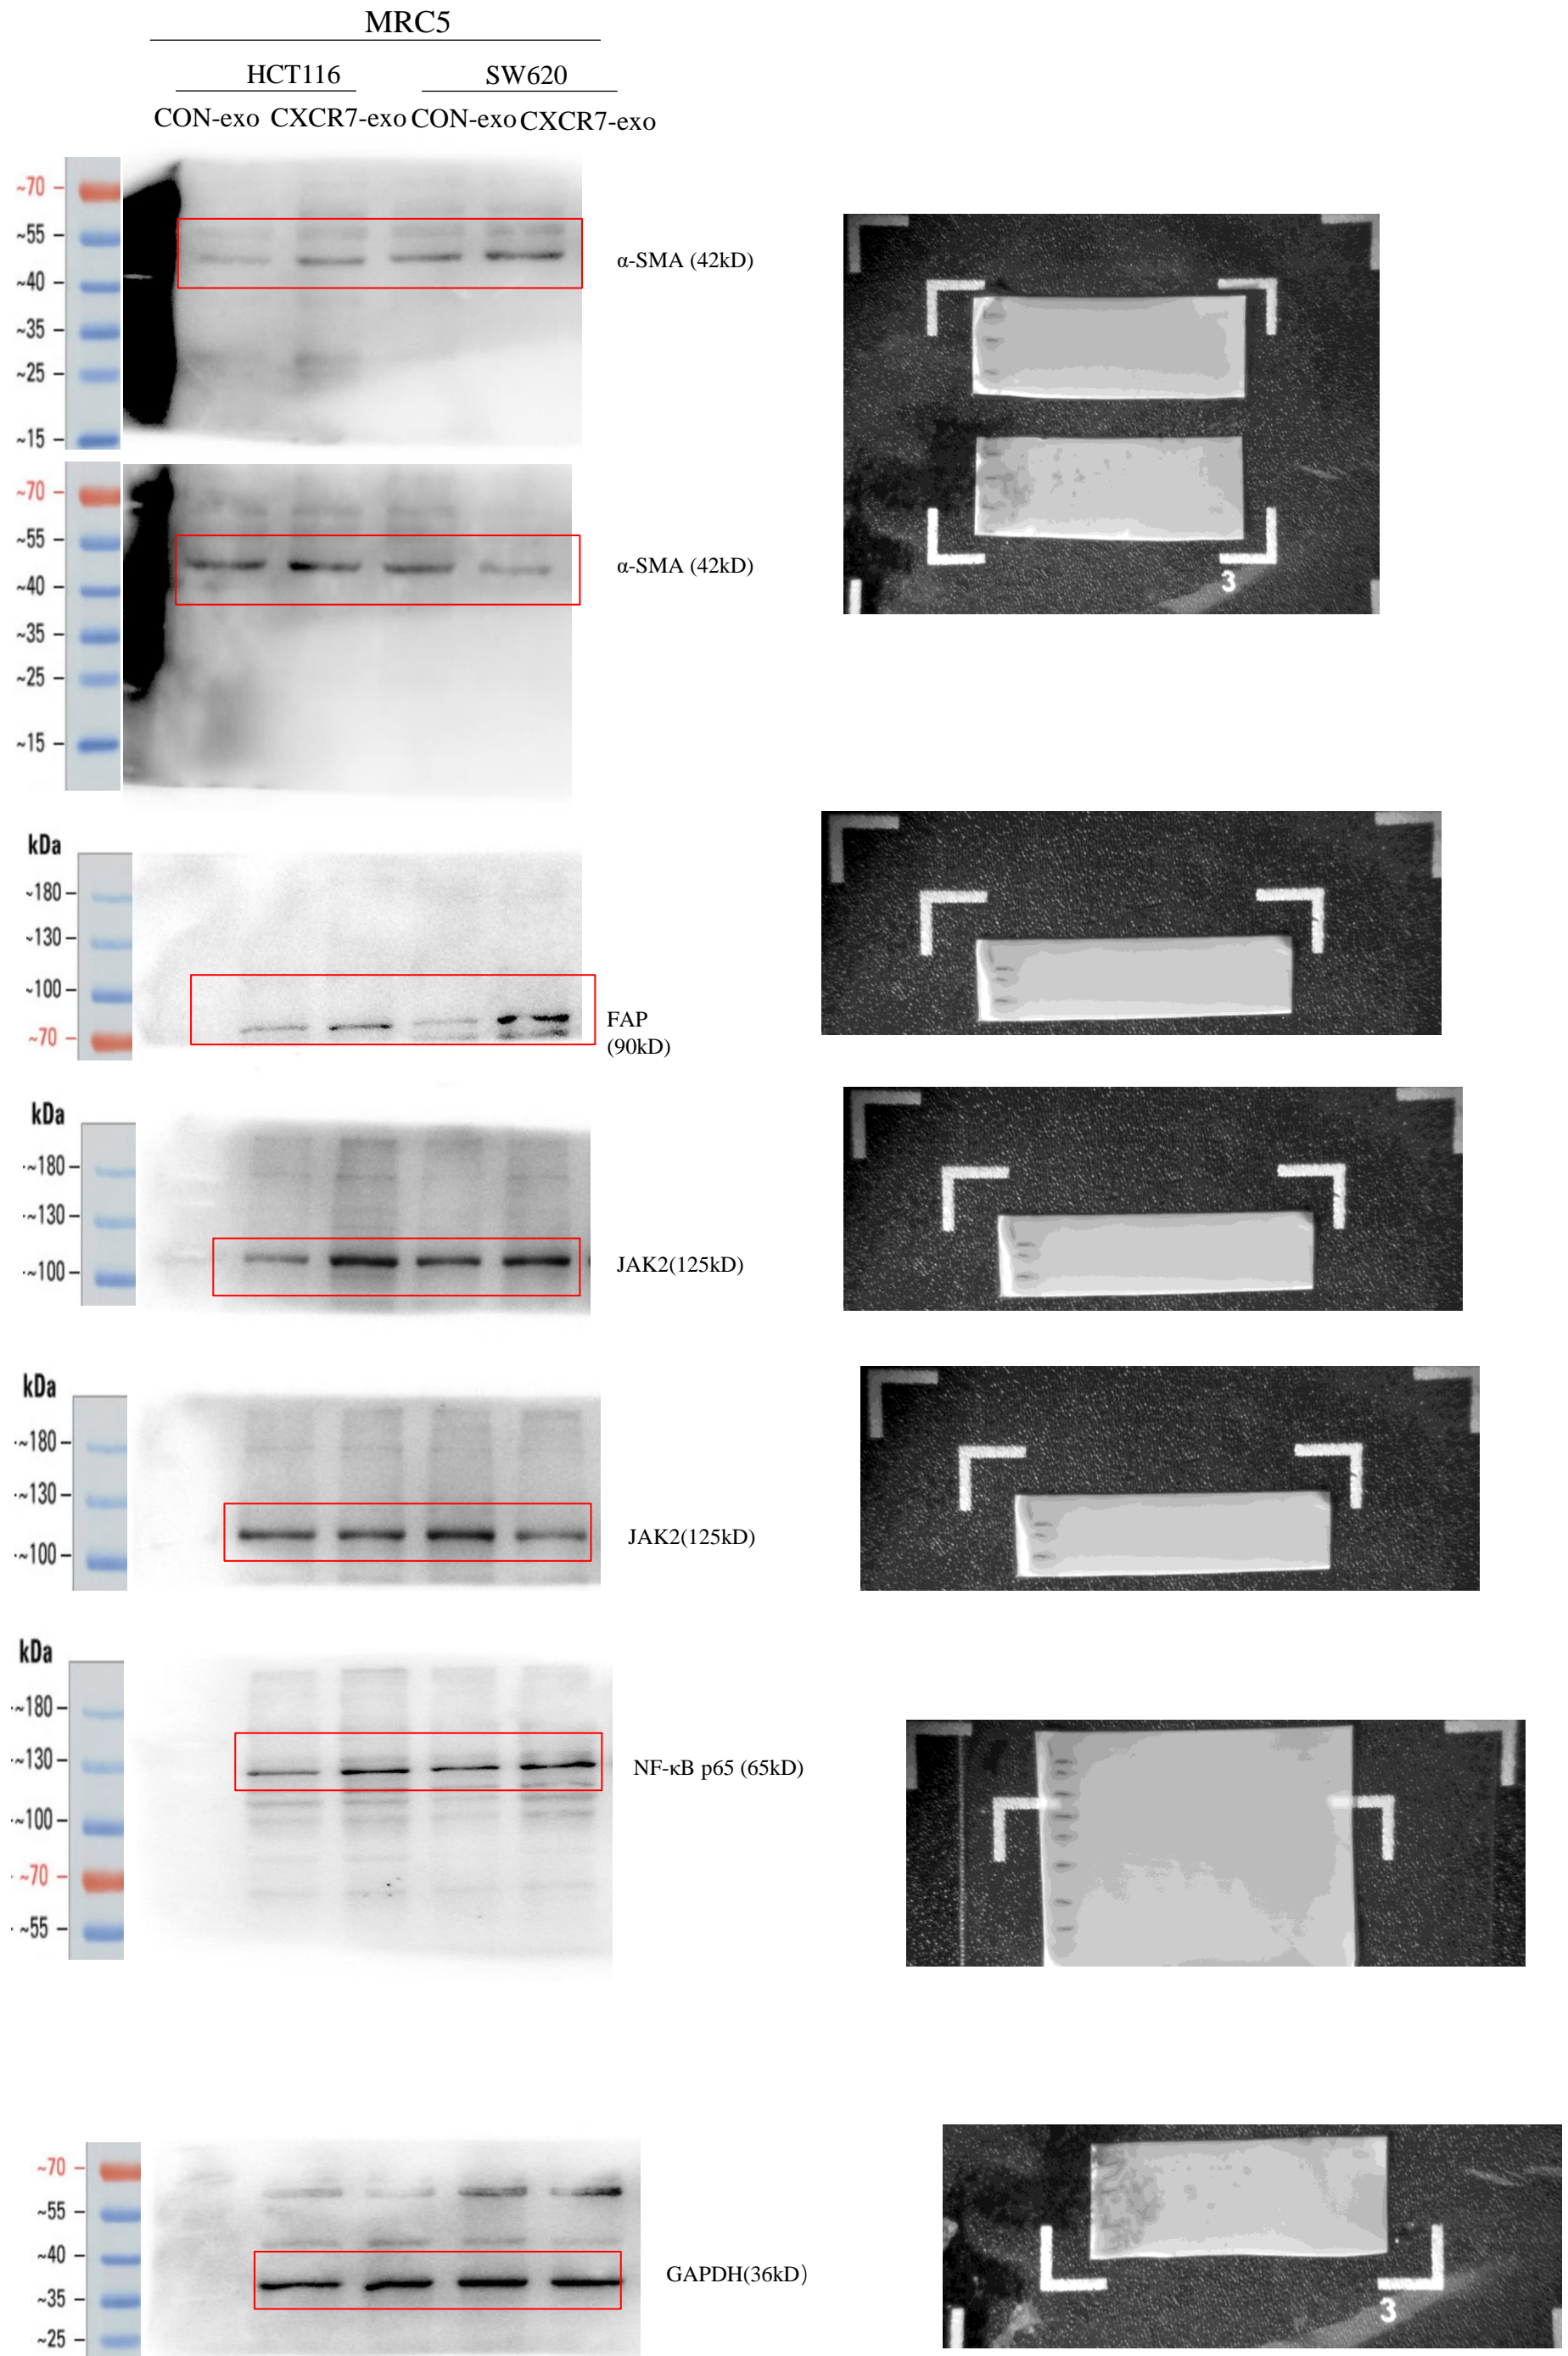



Figure 5E

MRC5

HCT116

SW620

CON-exo CXCR7-exo CON-exo CXCR7-exo

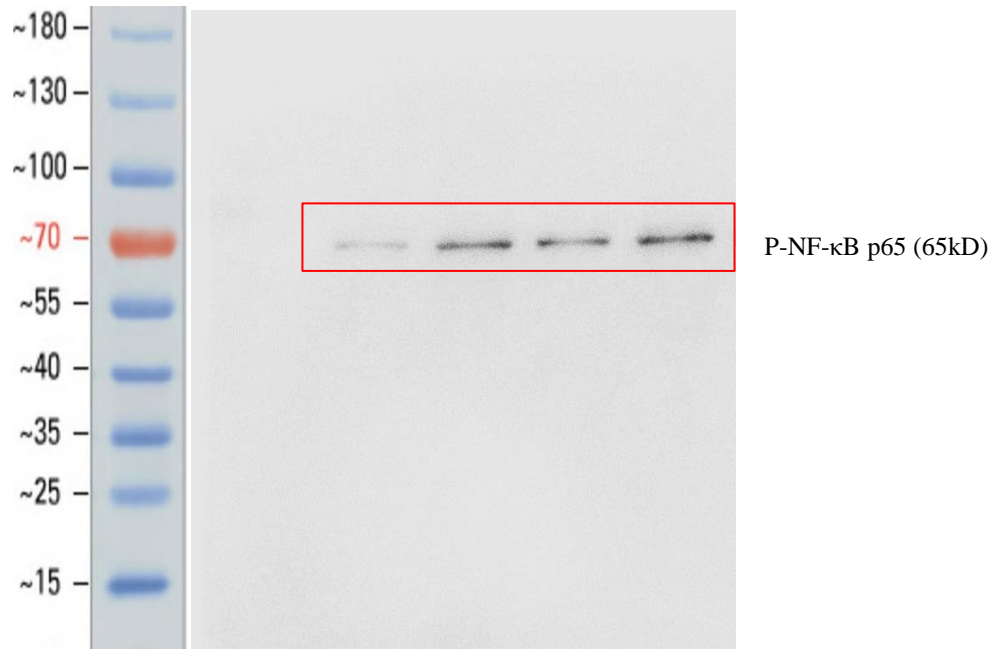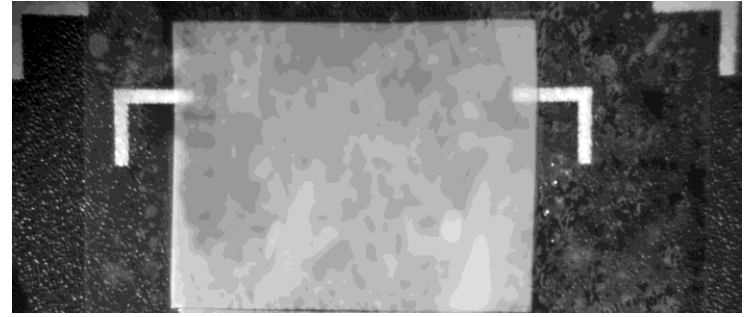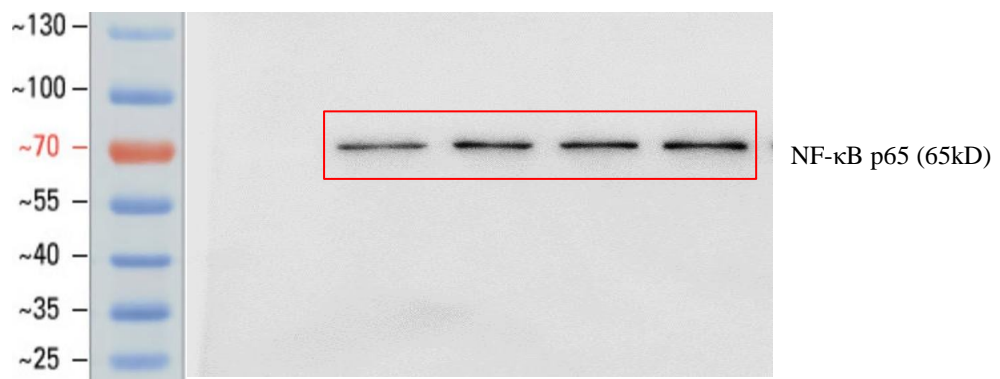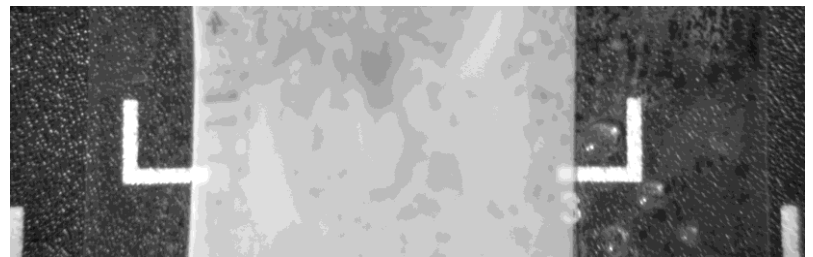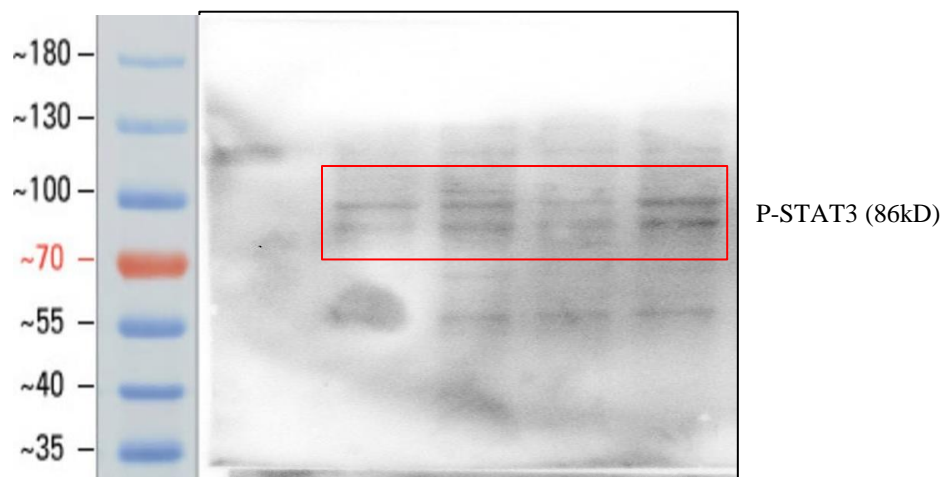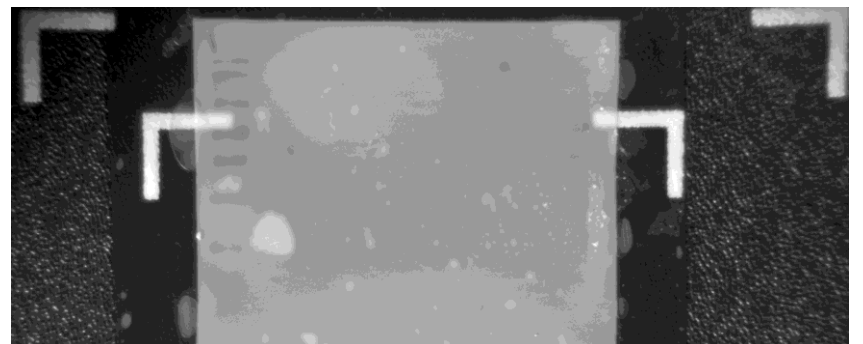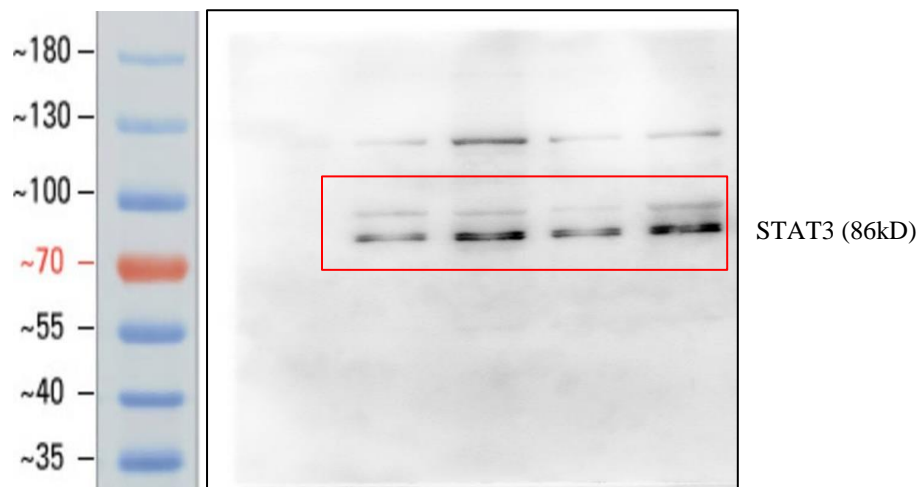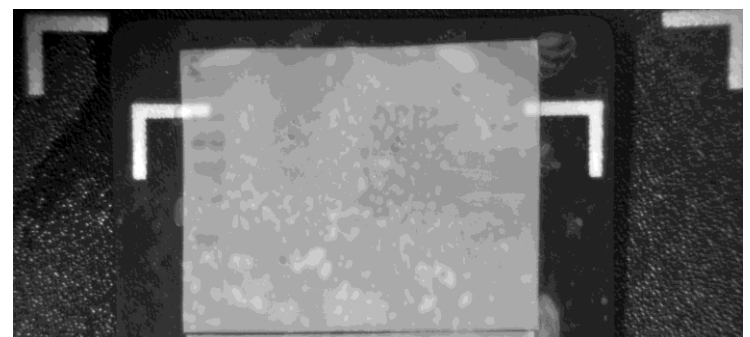



Figure 5E

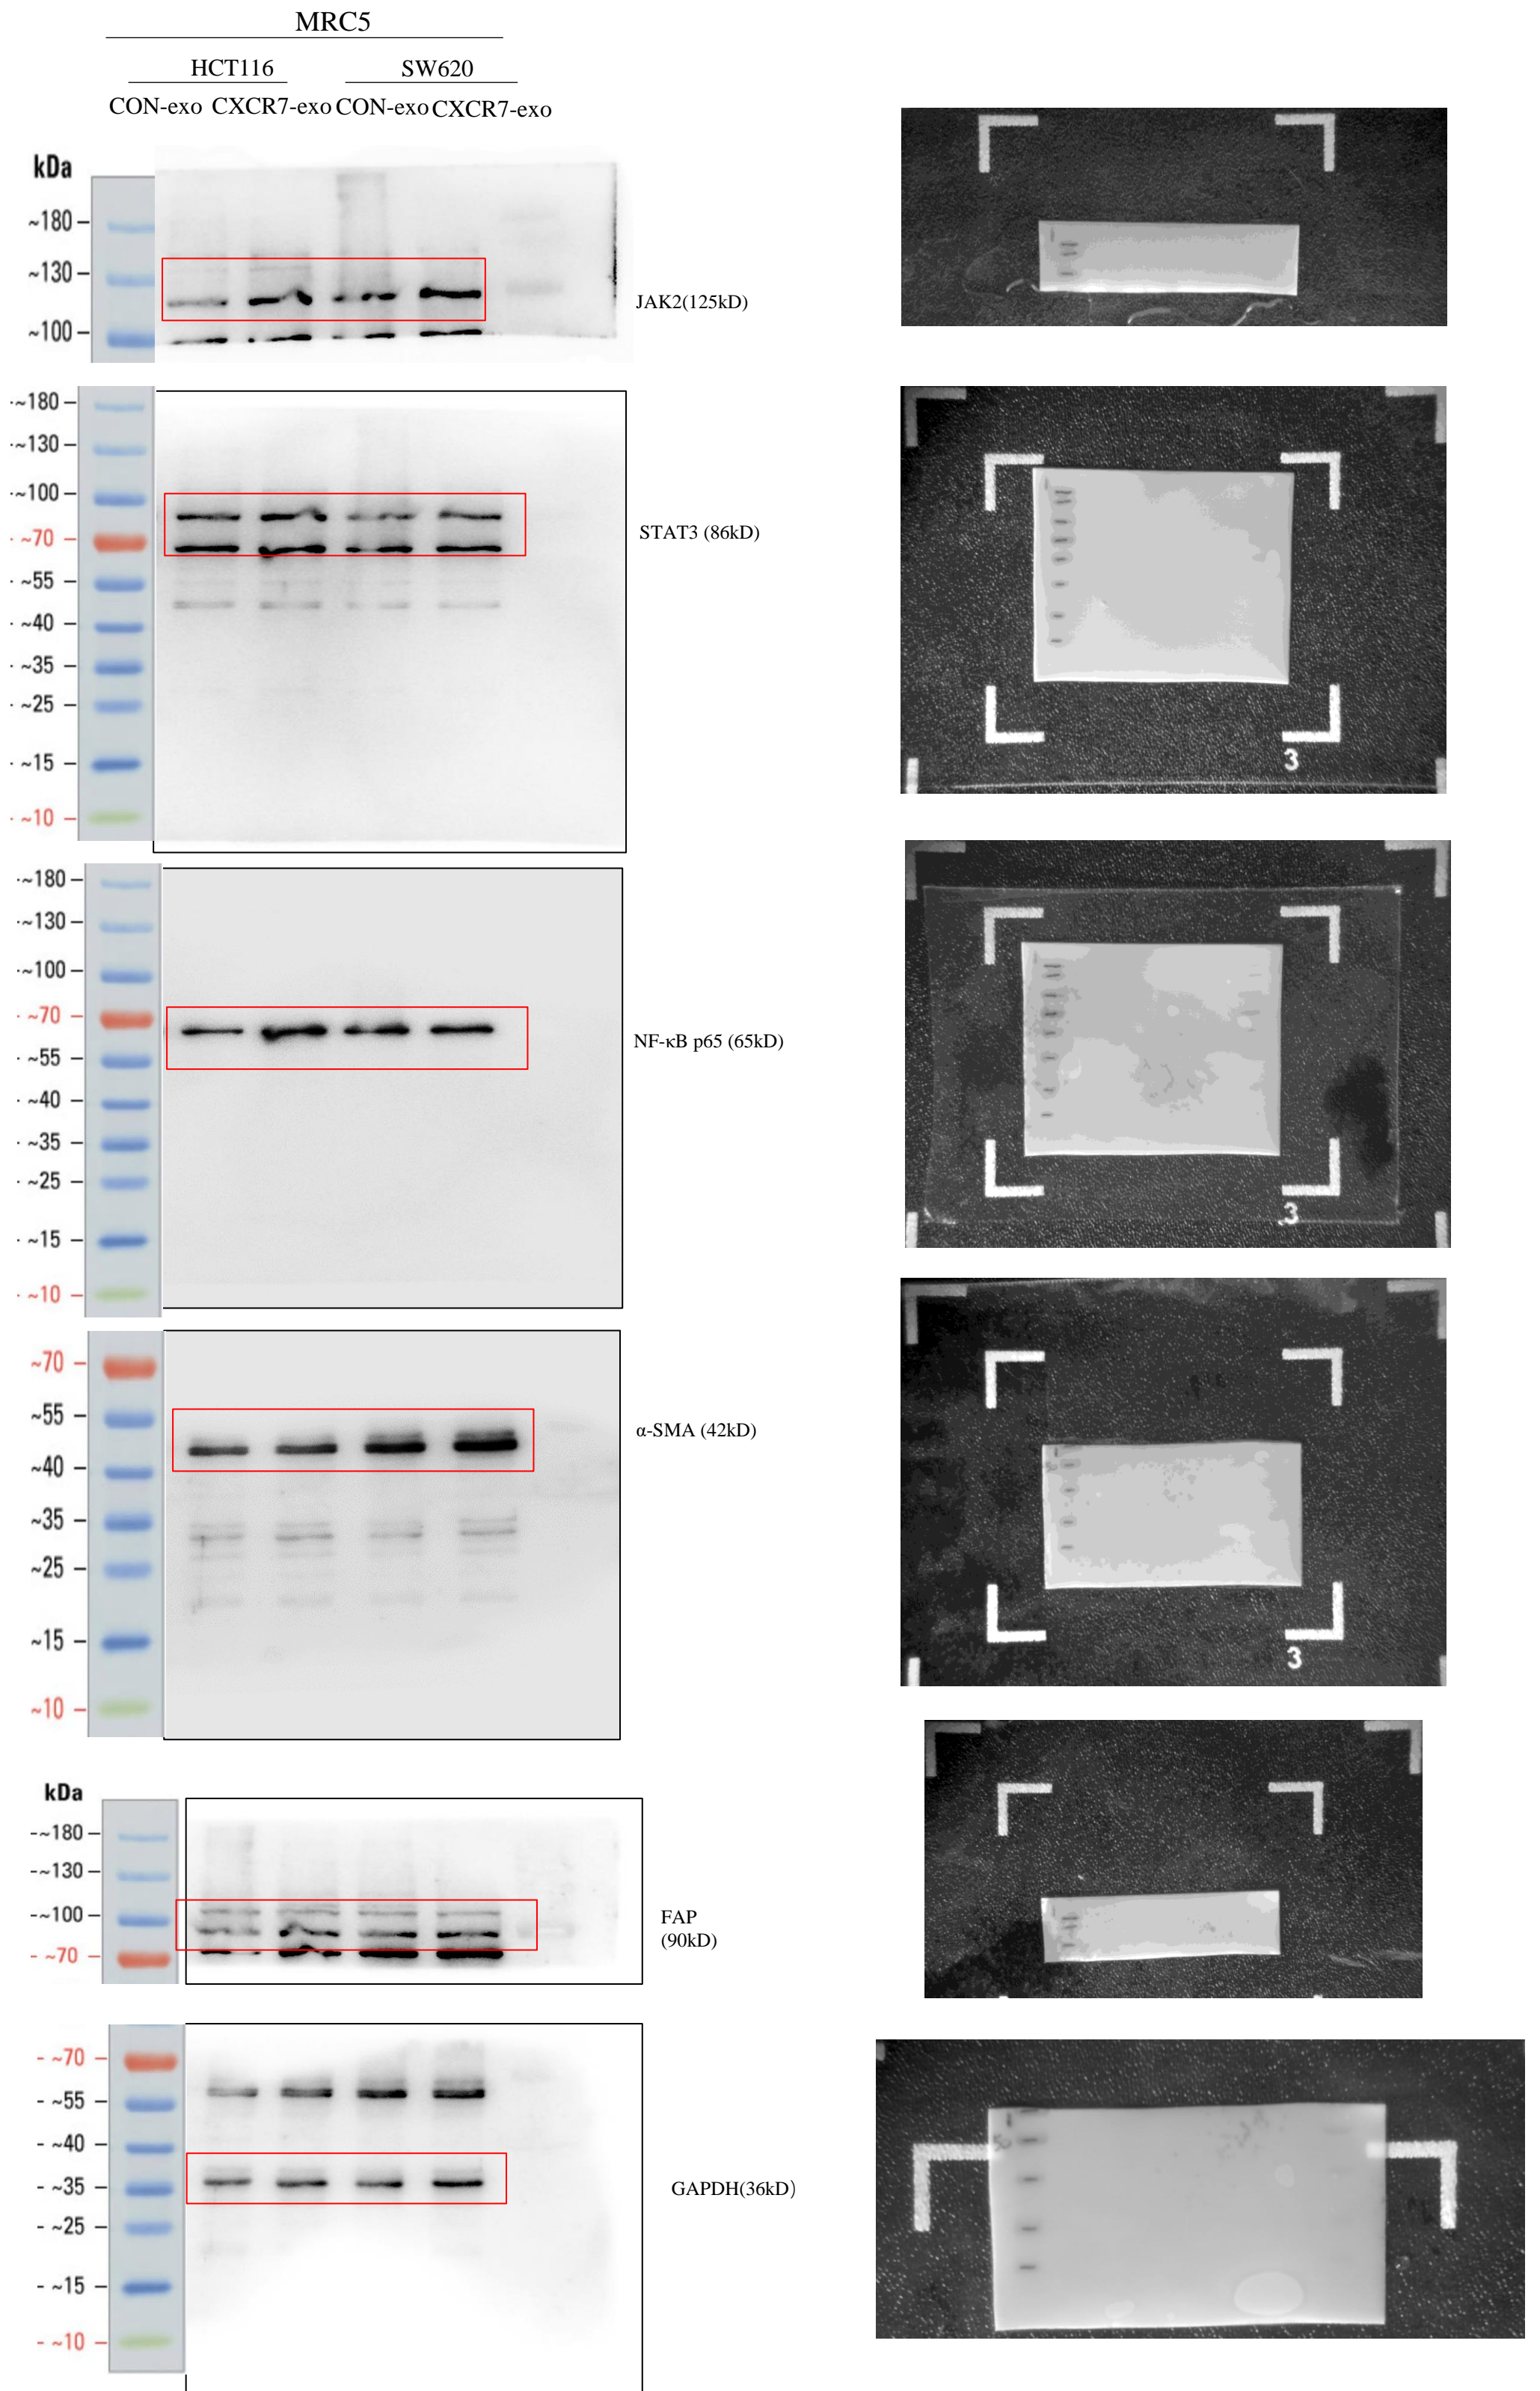



Figure 5E

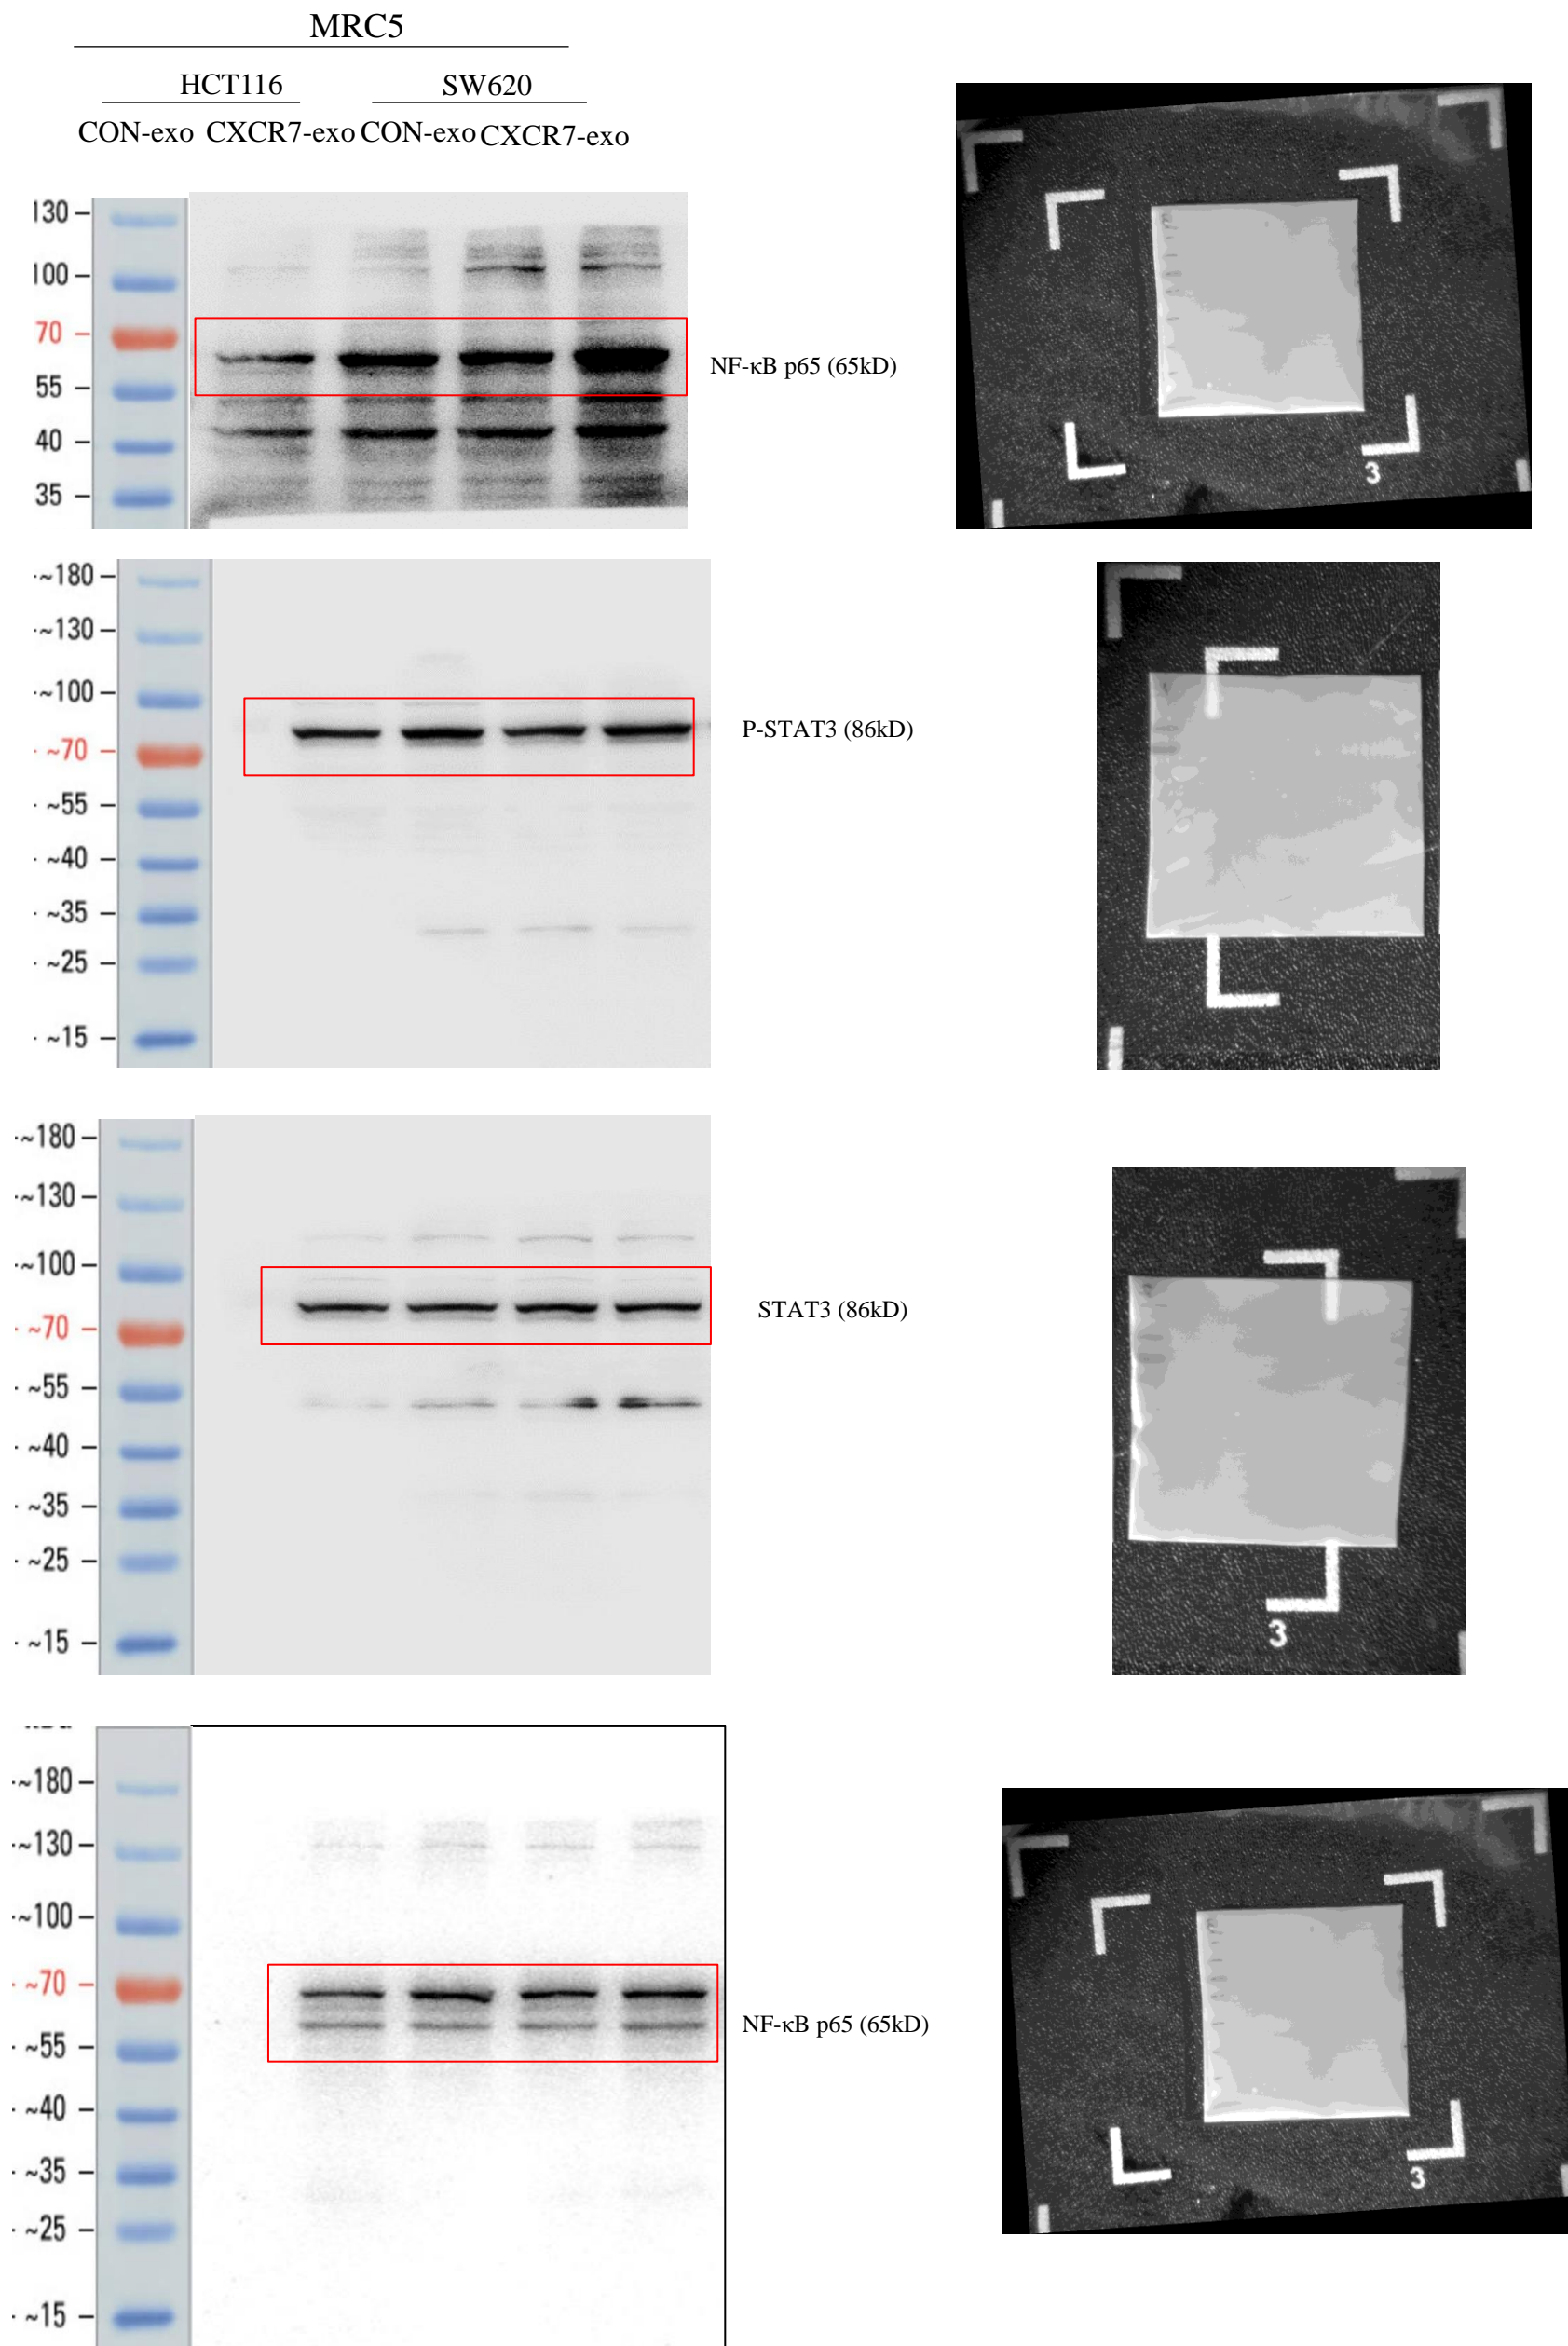



Fig. 6C

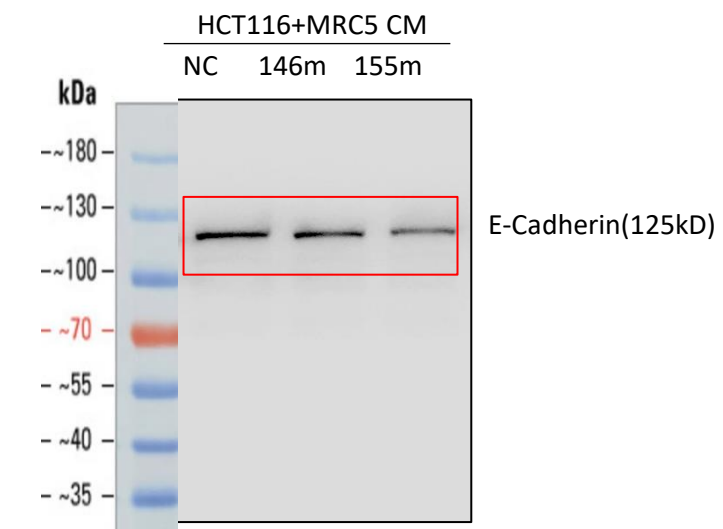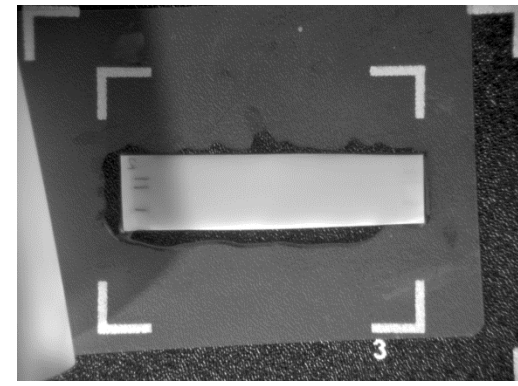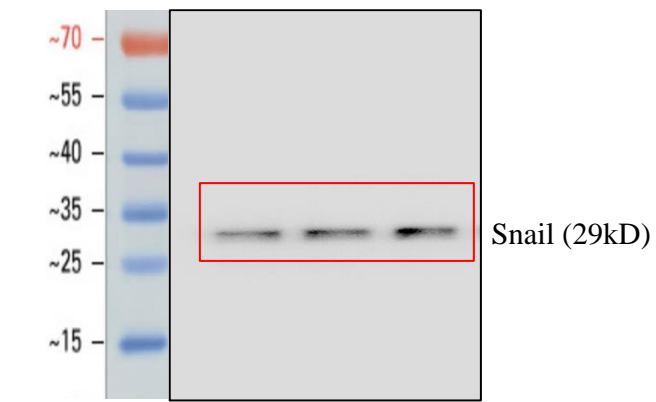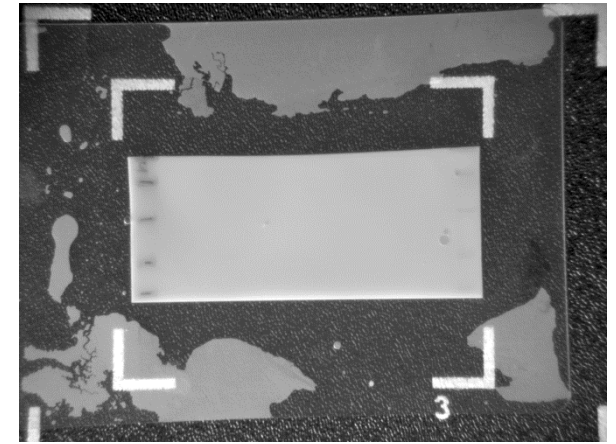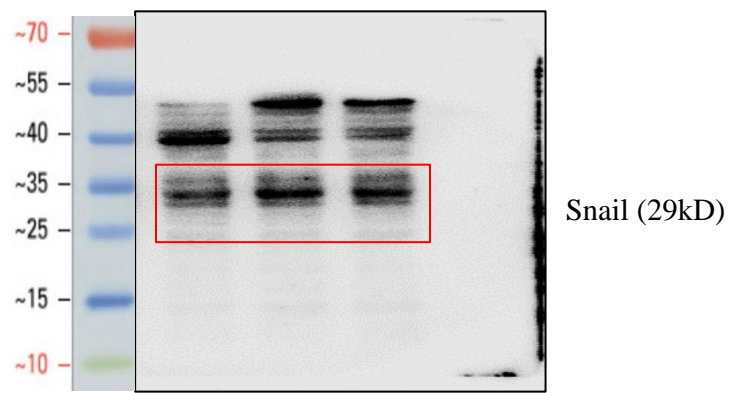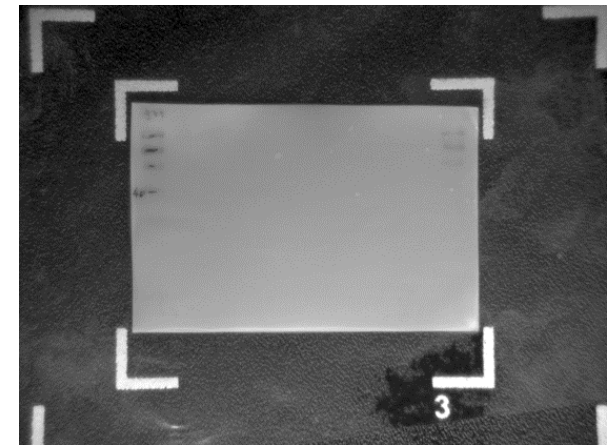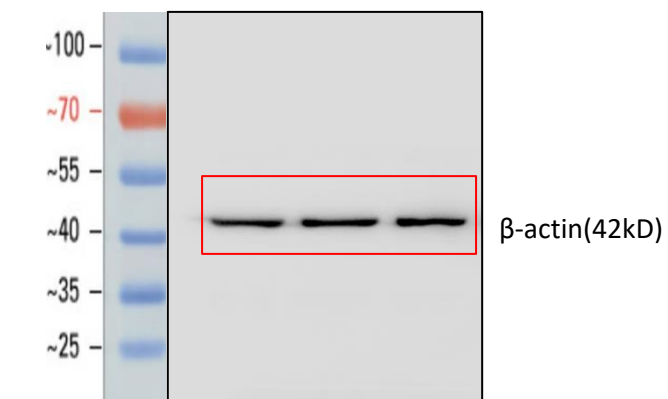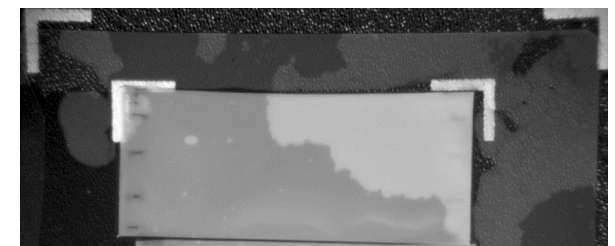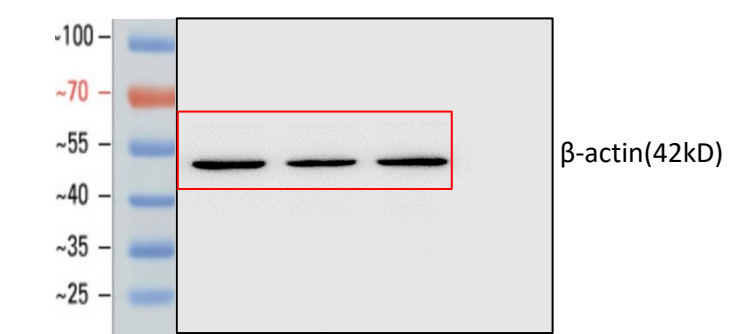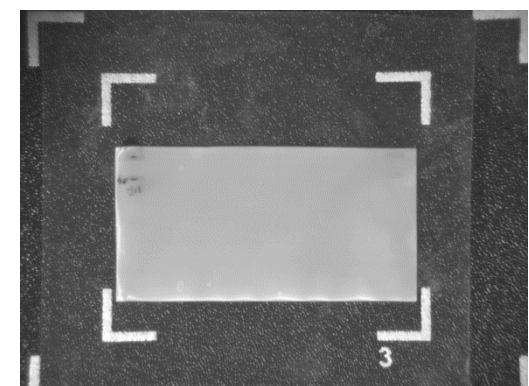



Fig. 6C

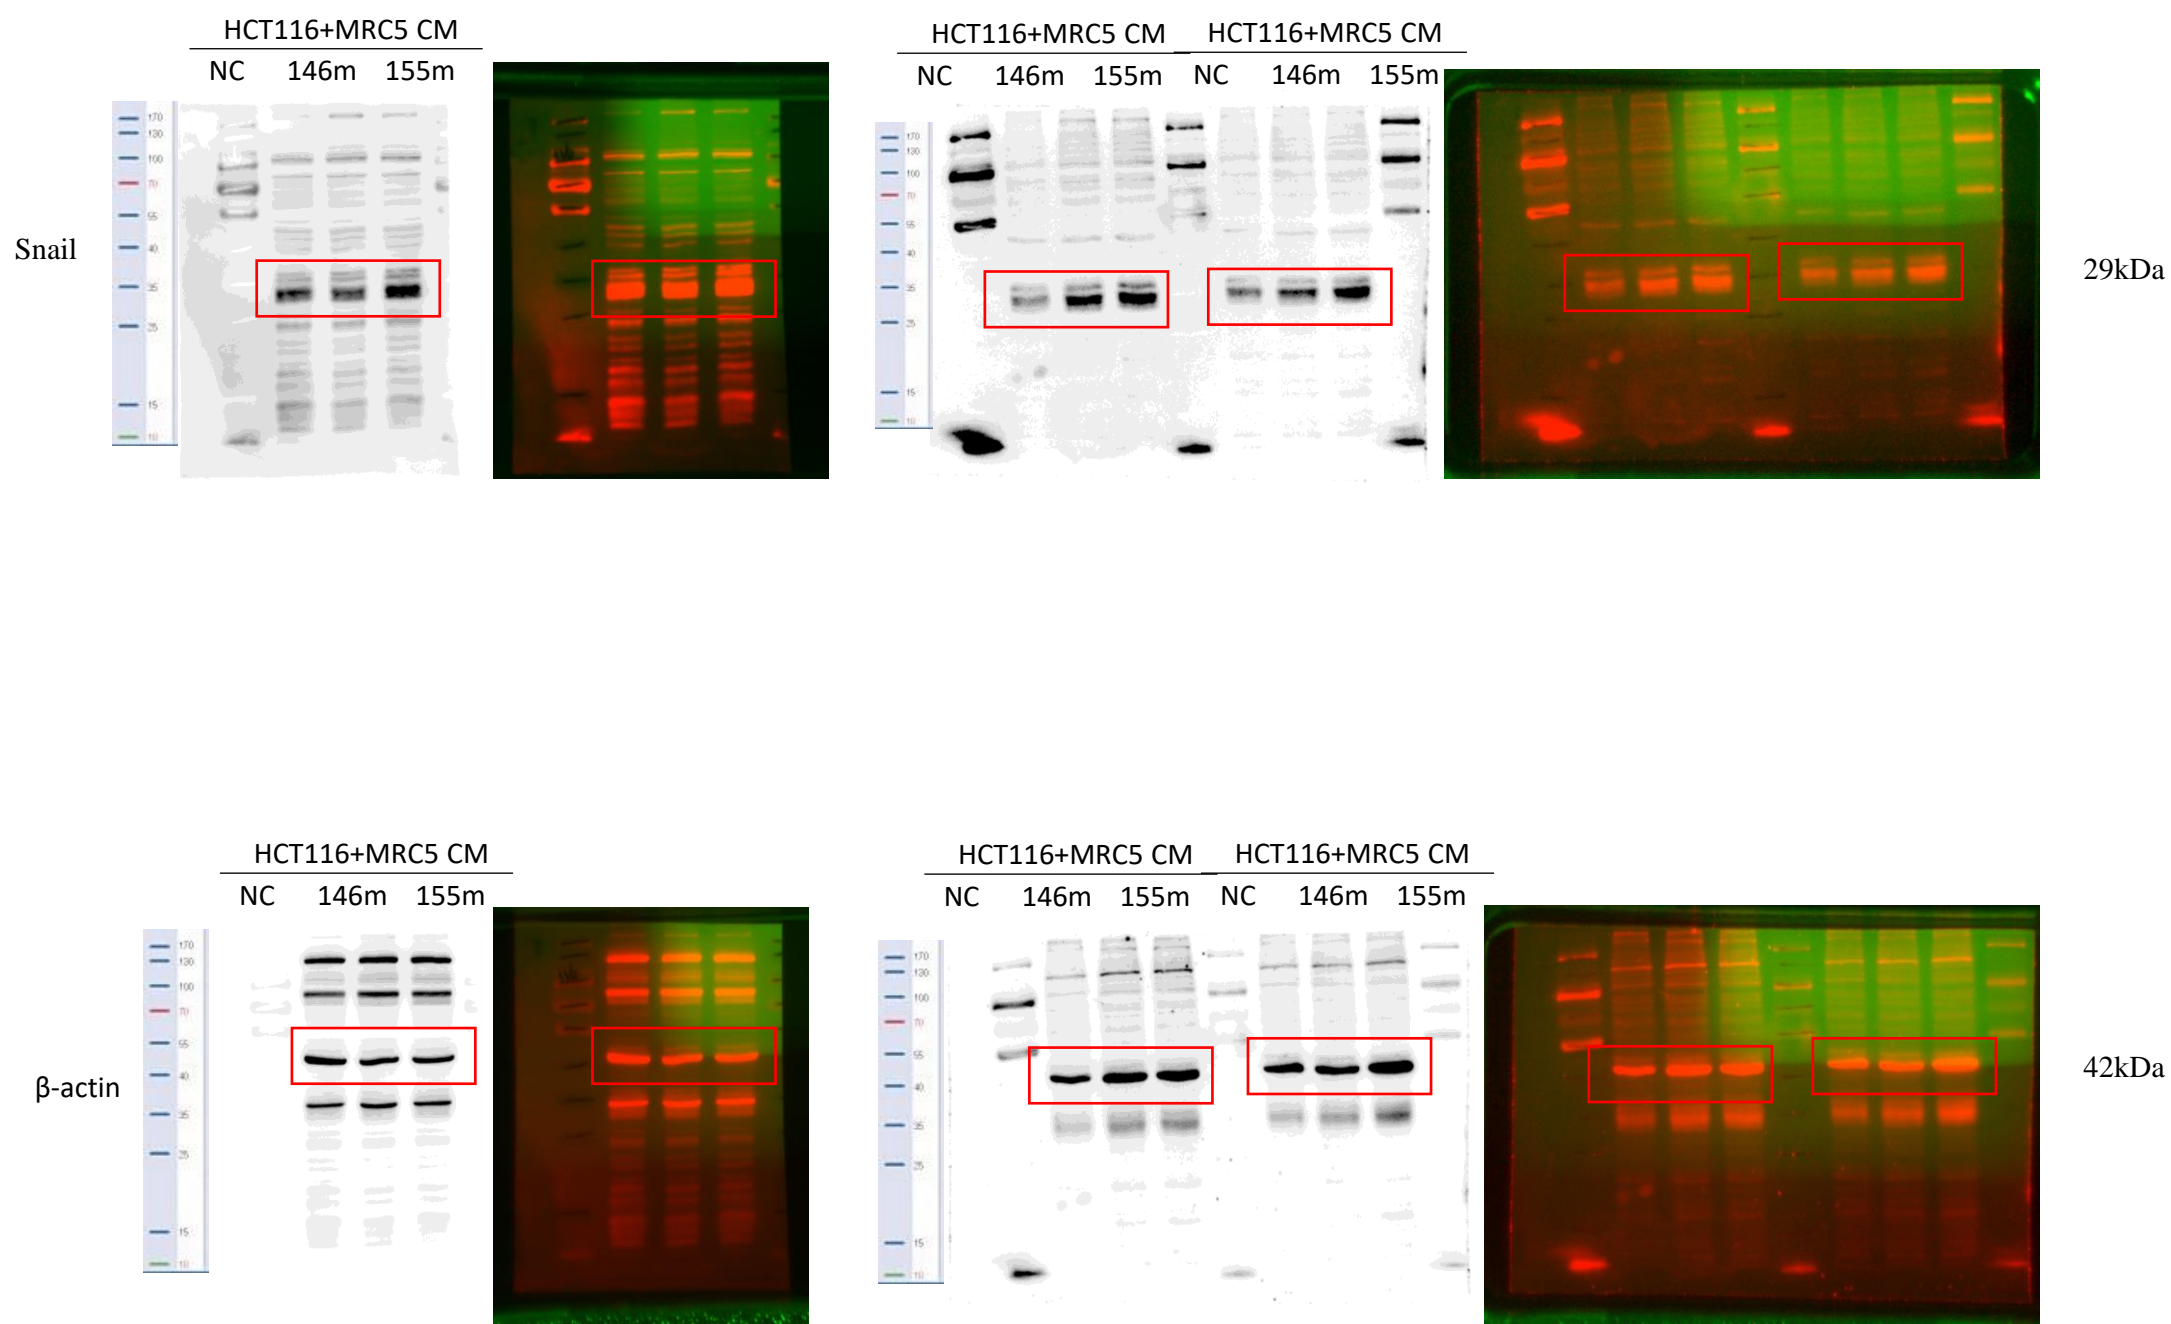



Fig. 6C

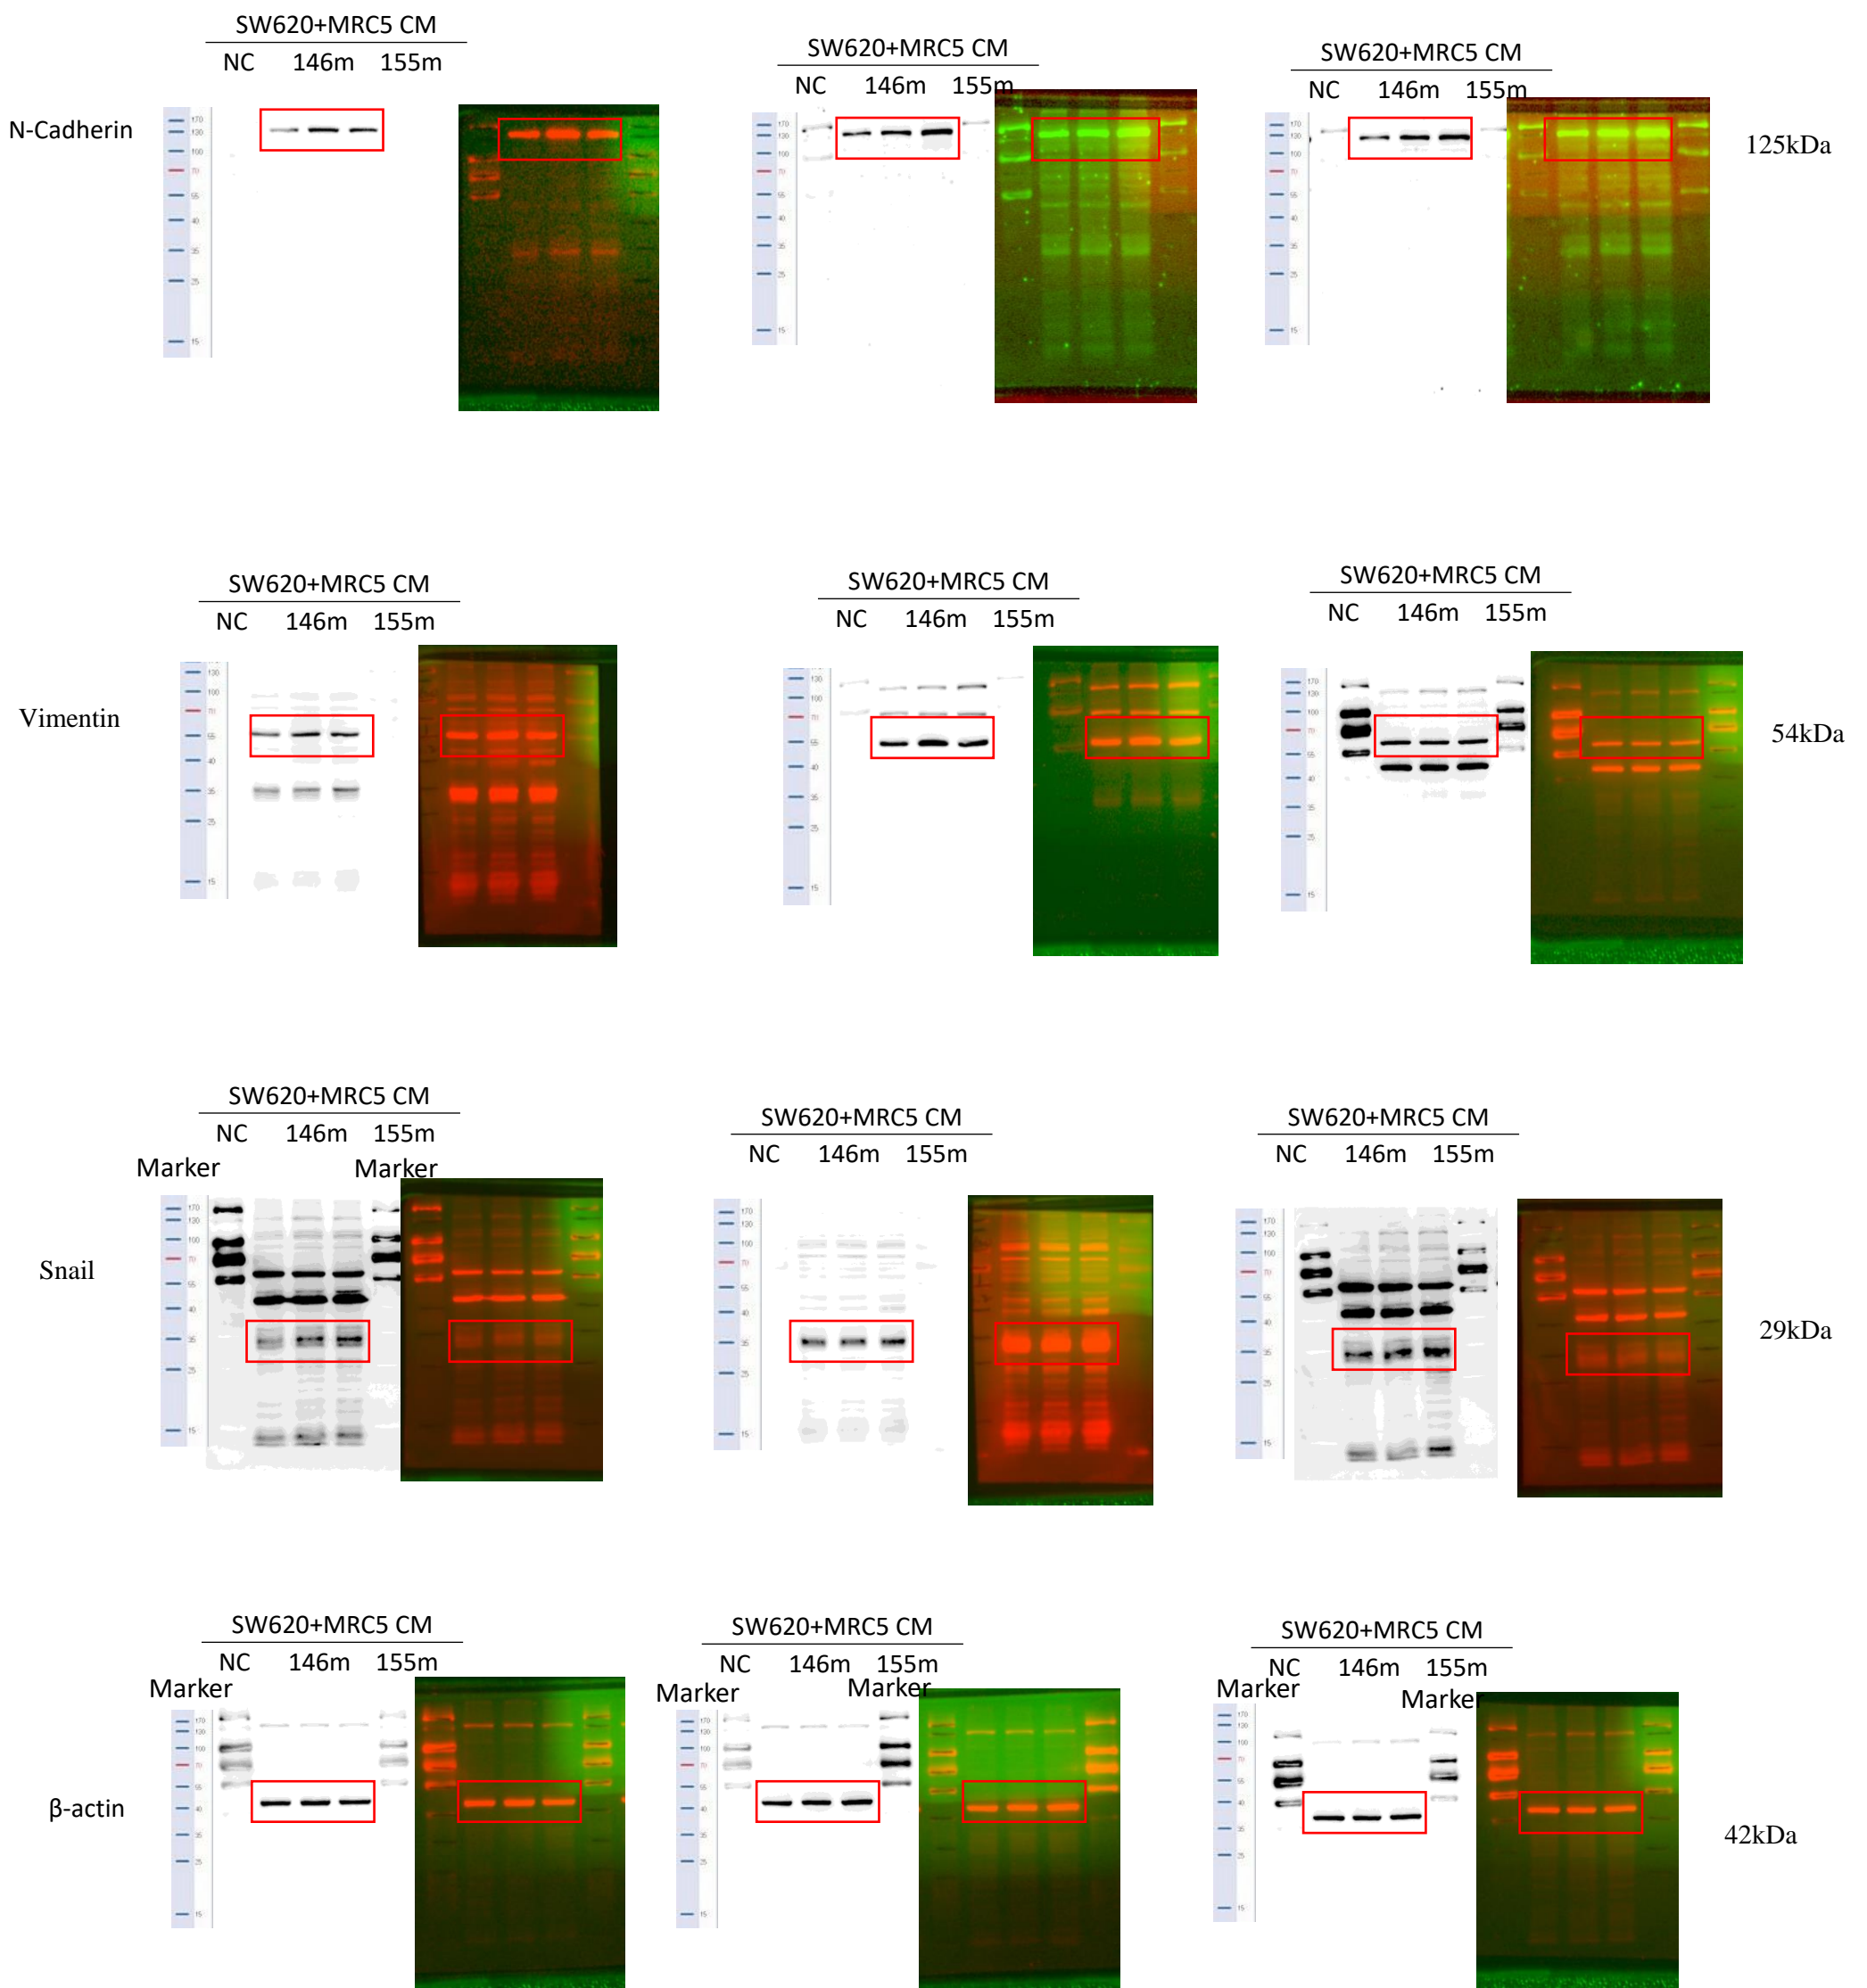



Figure 6D

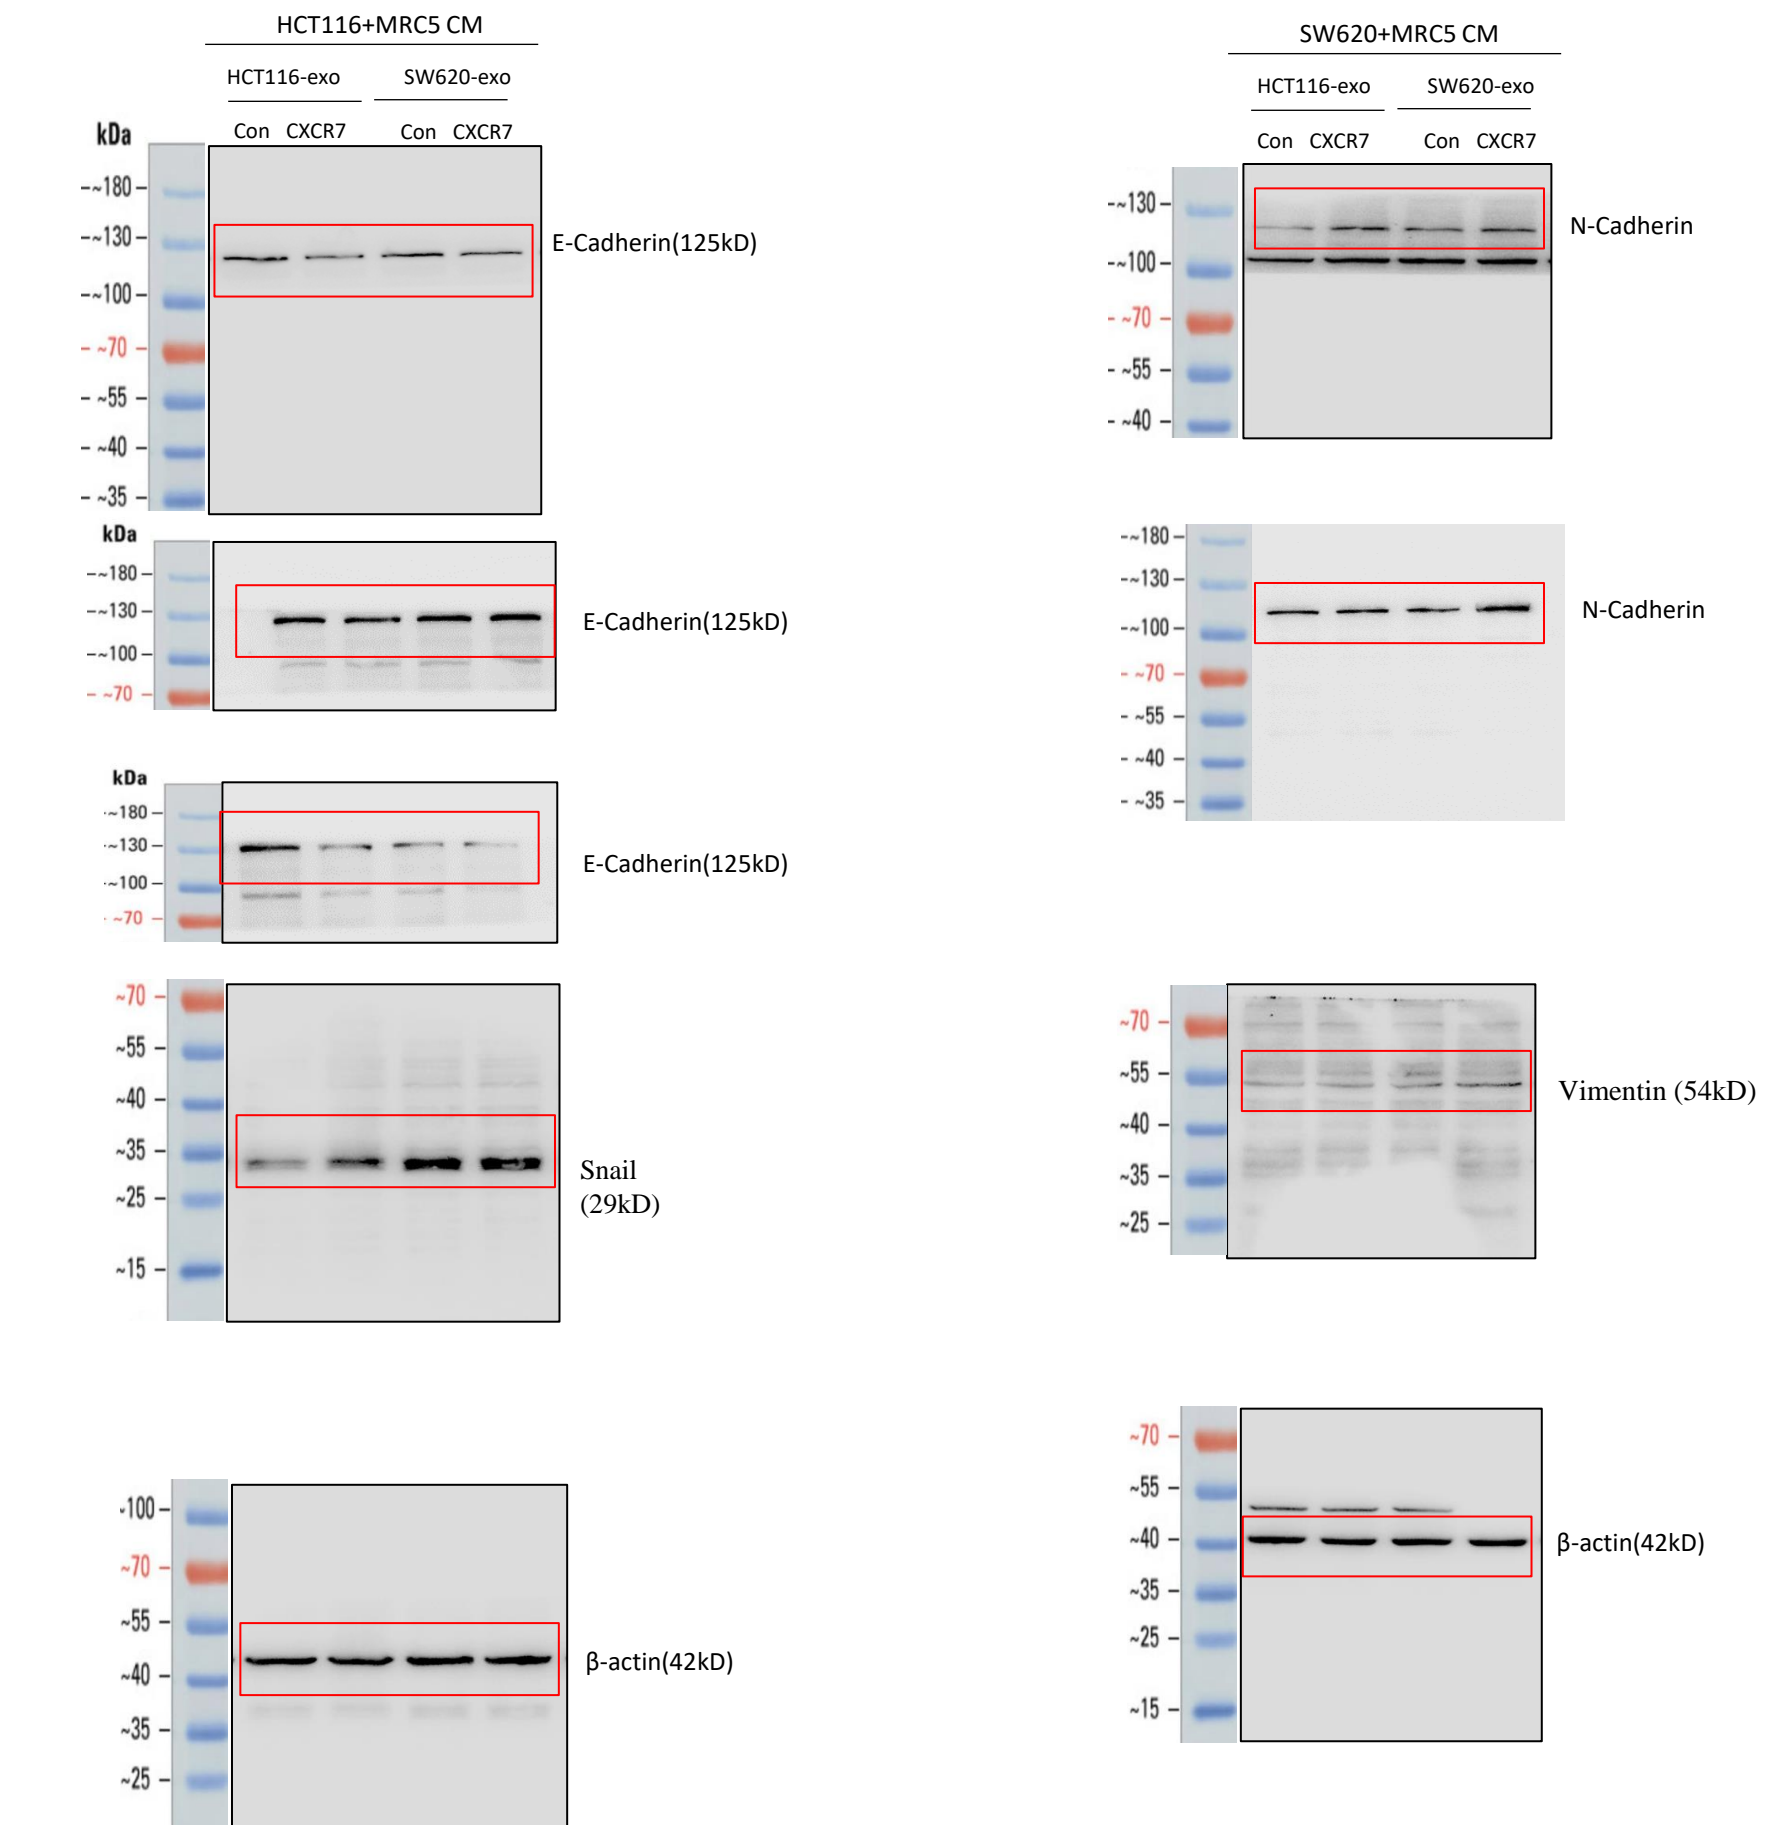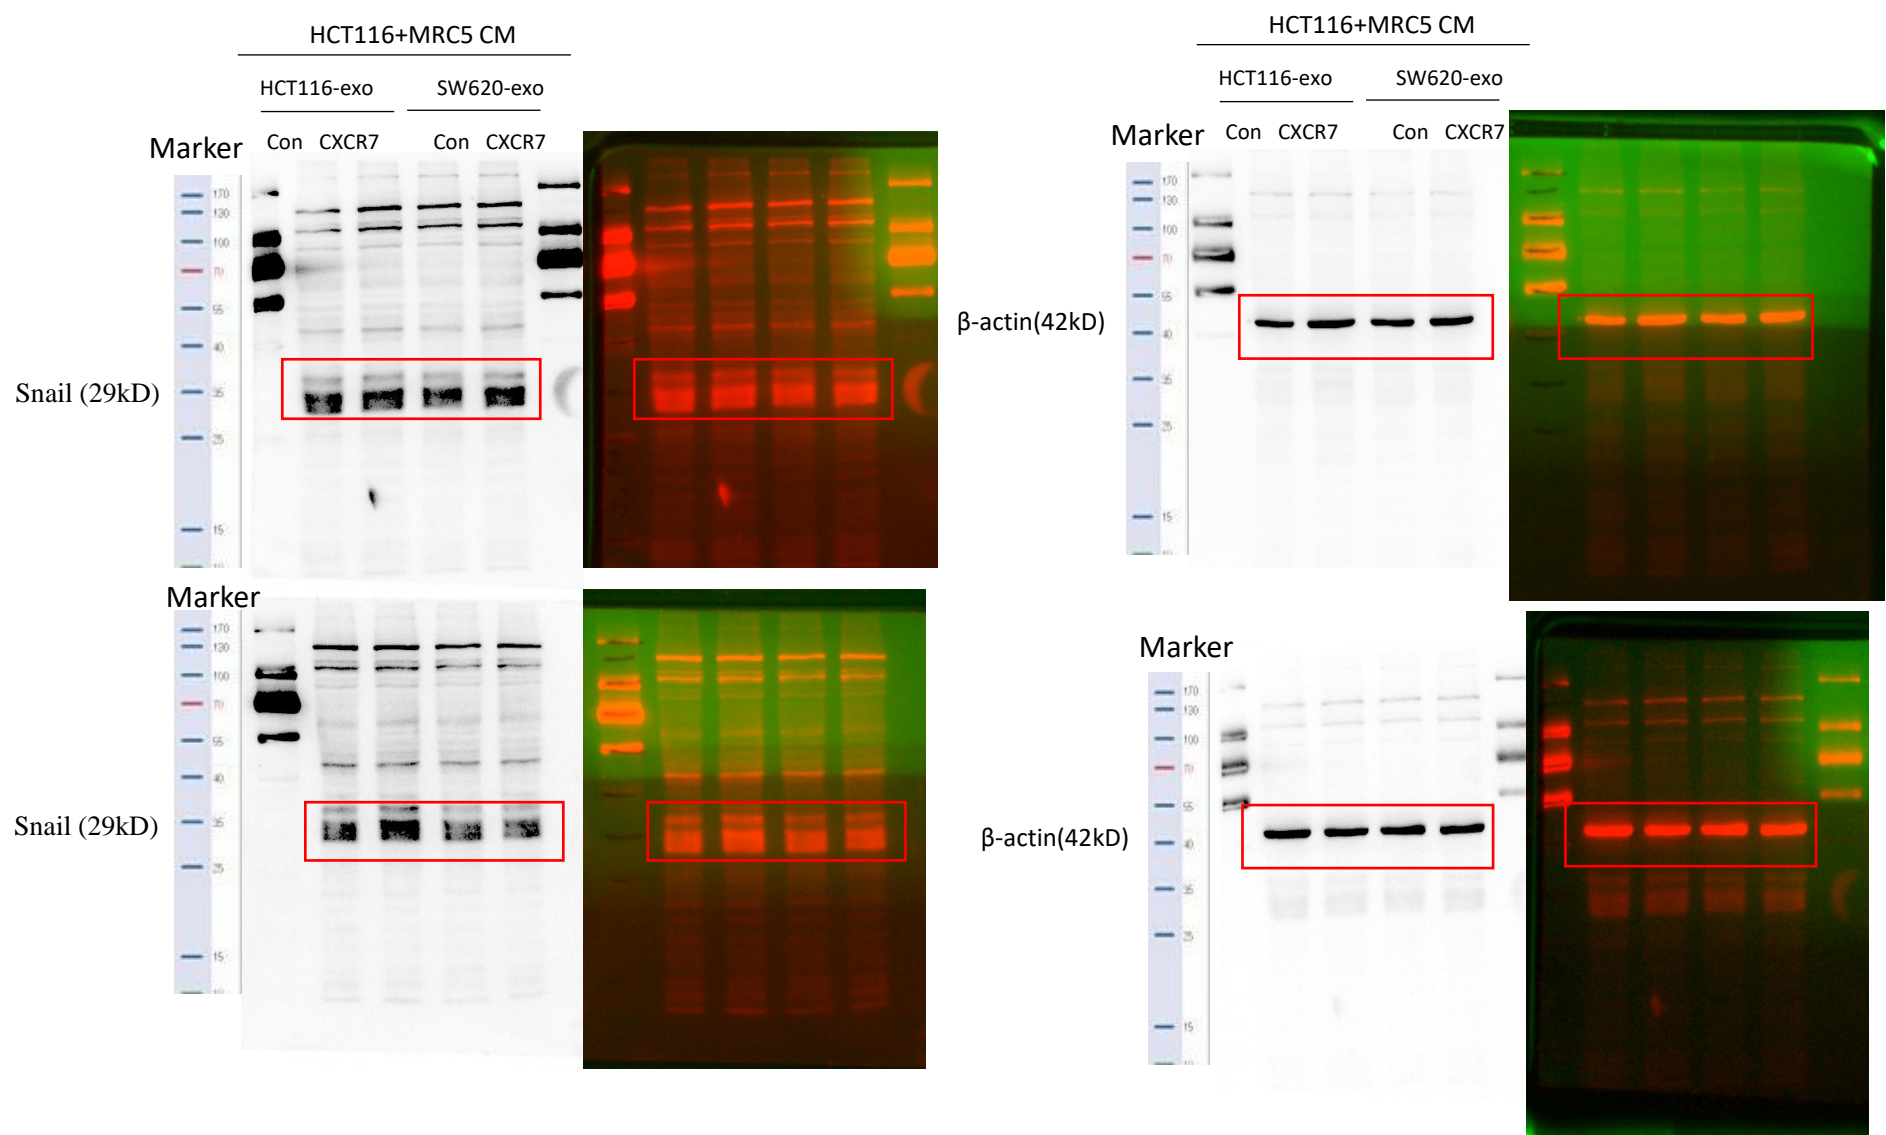



Figure 6D

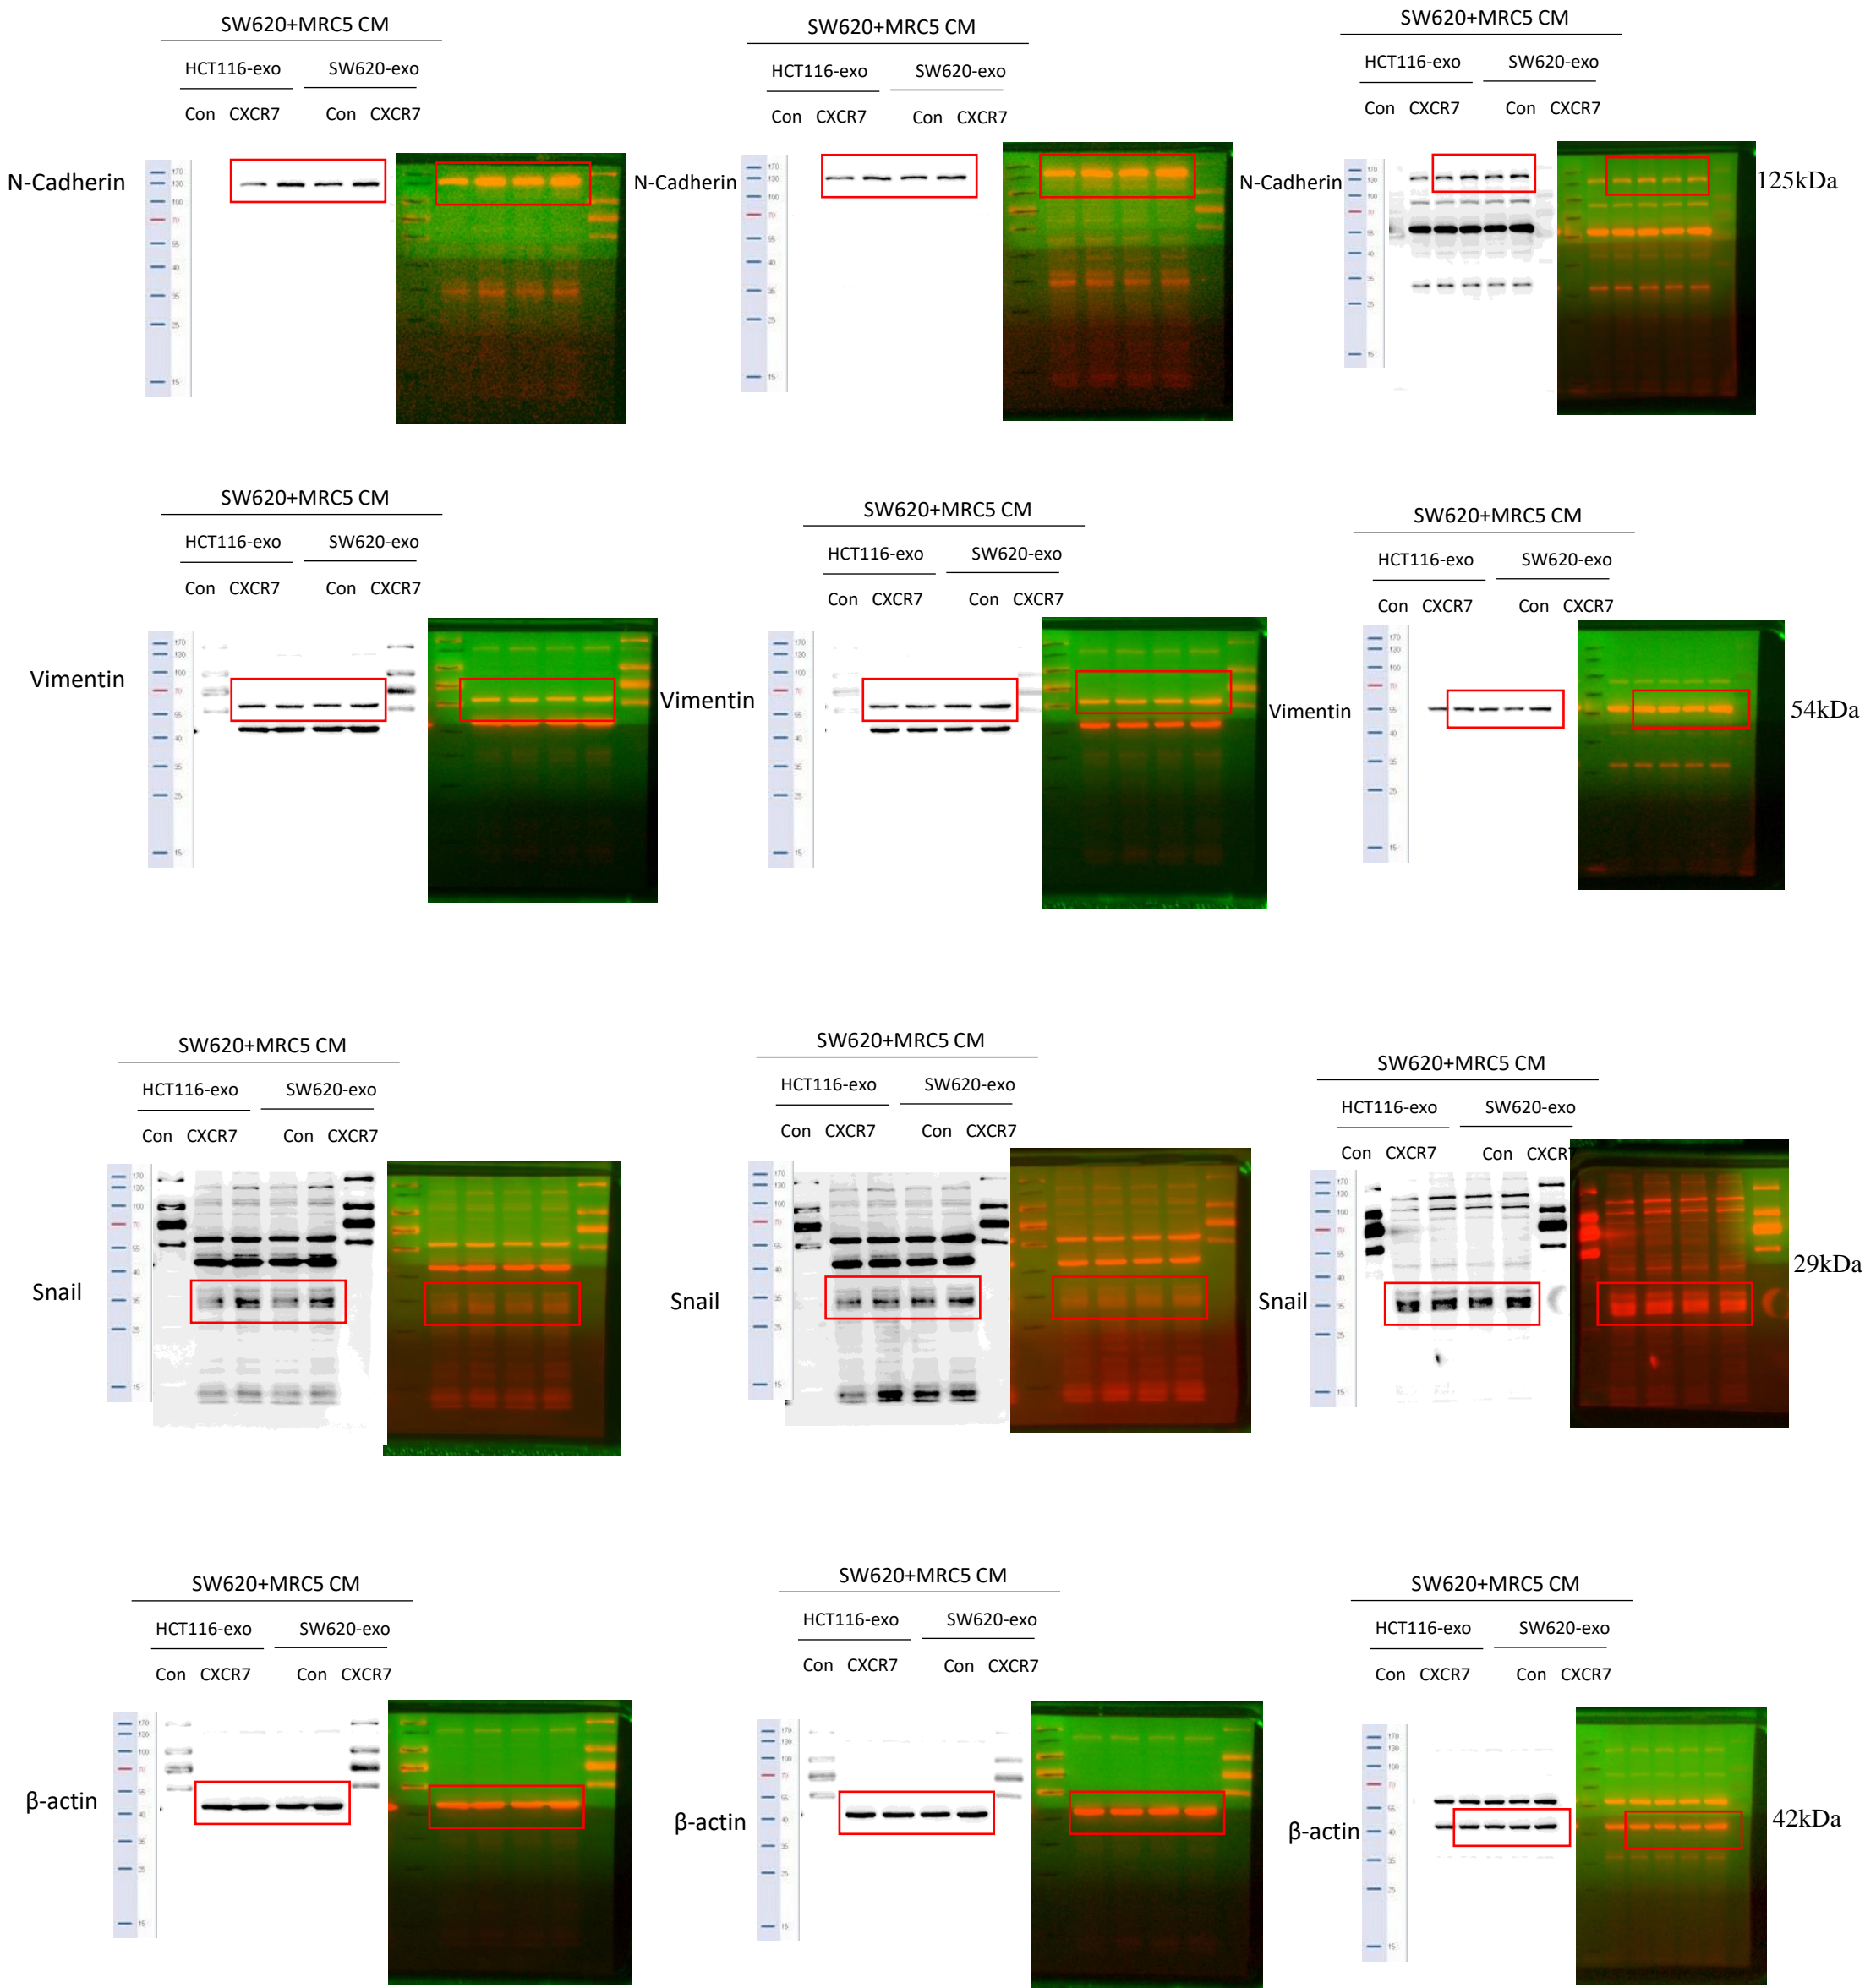



Figure 7C

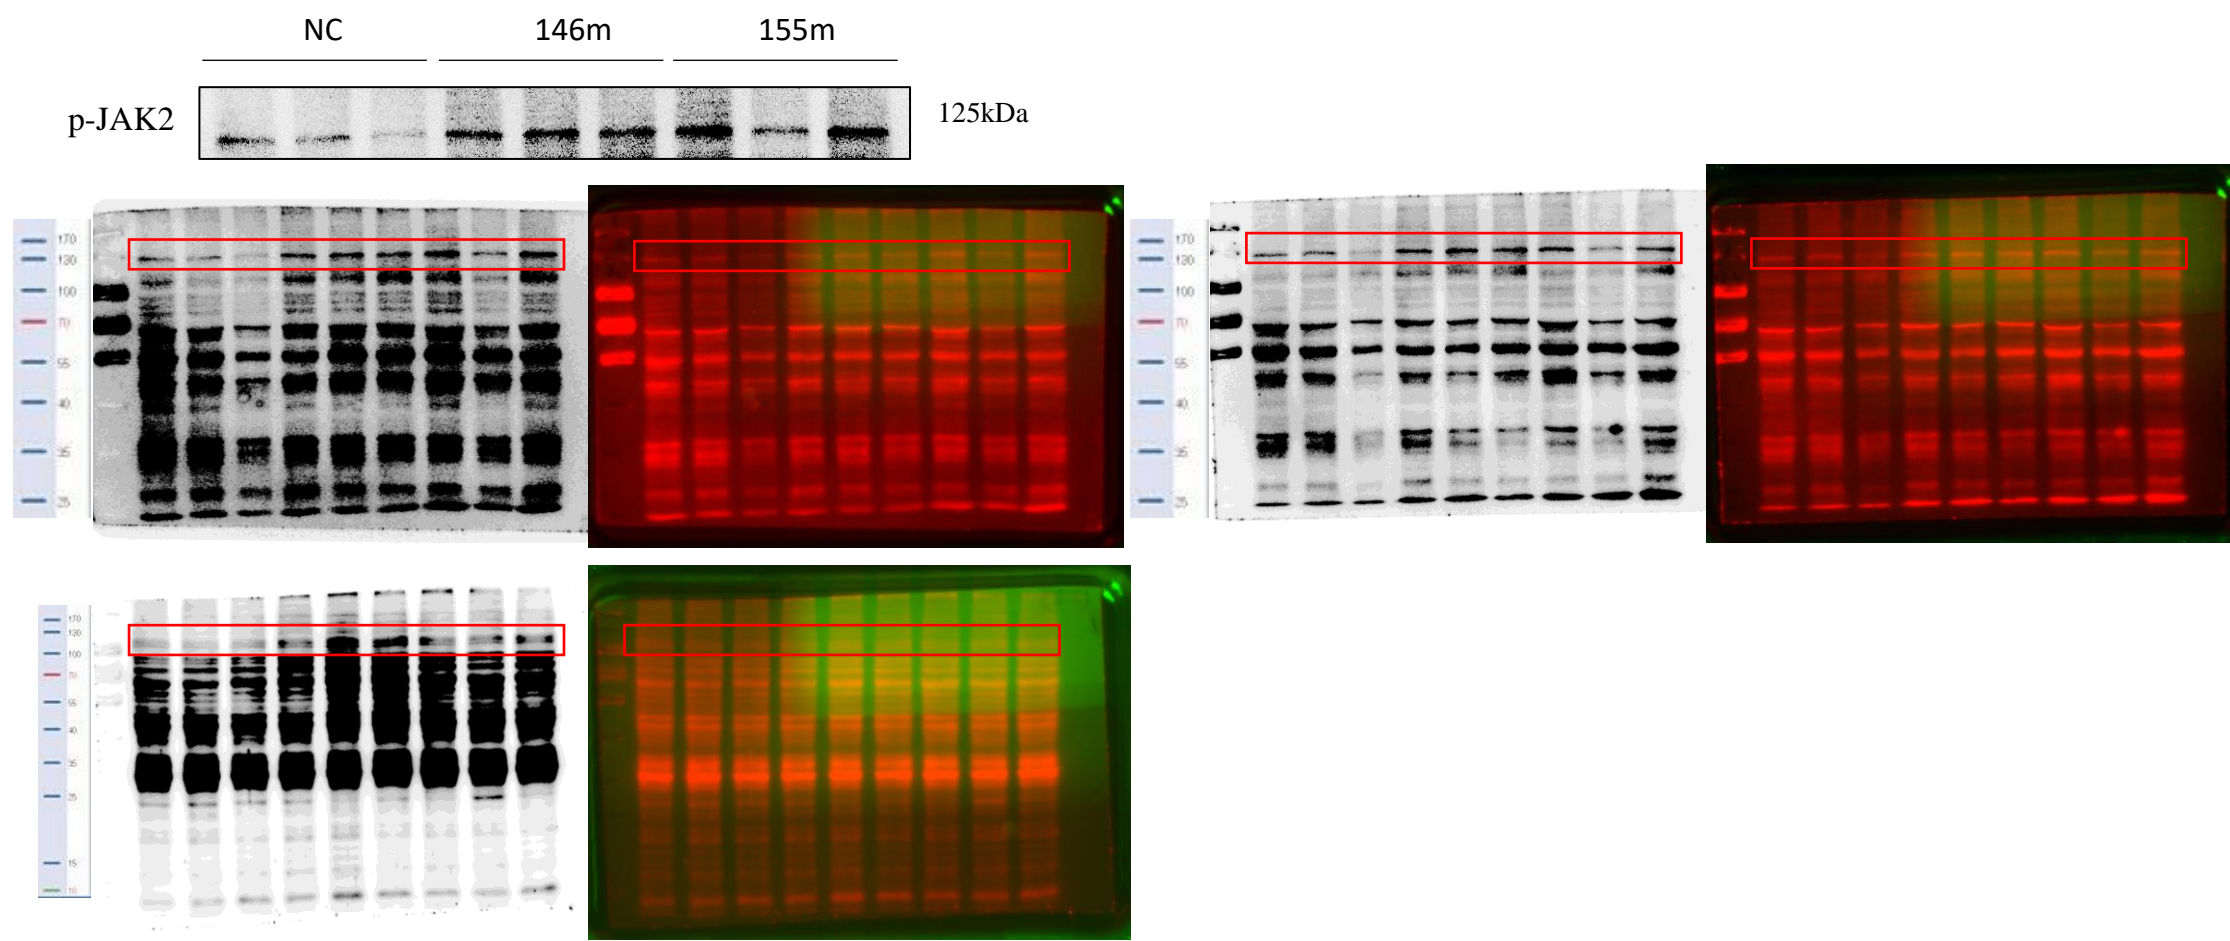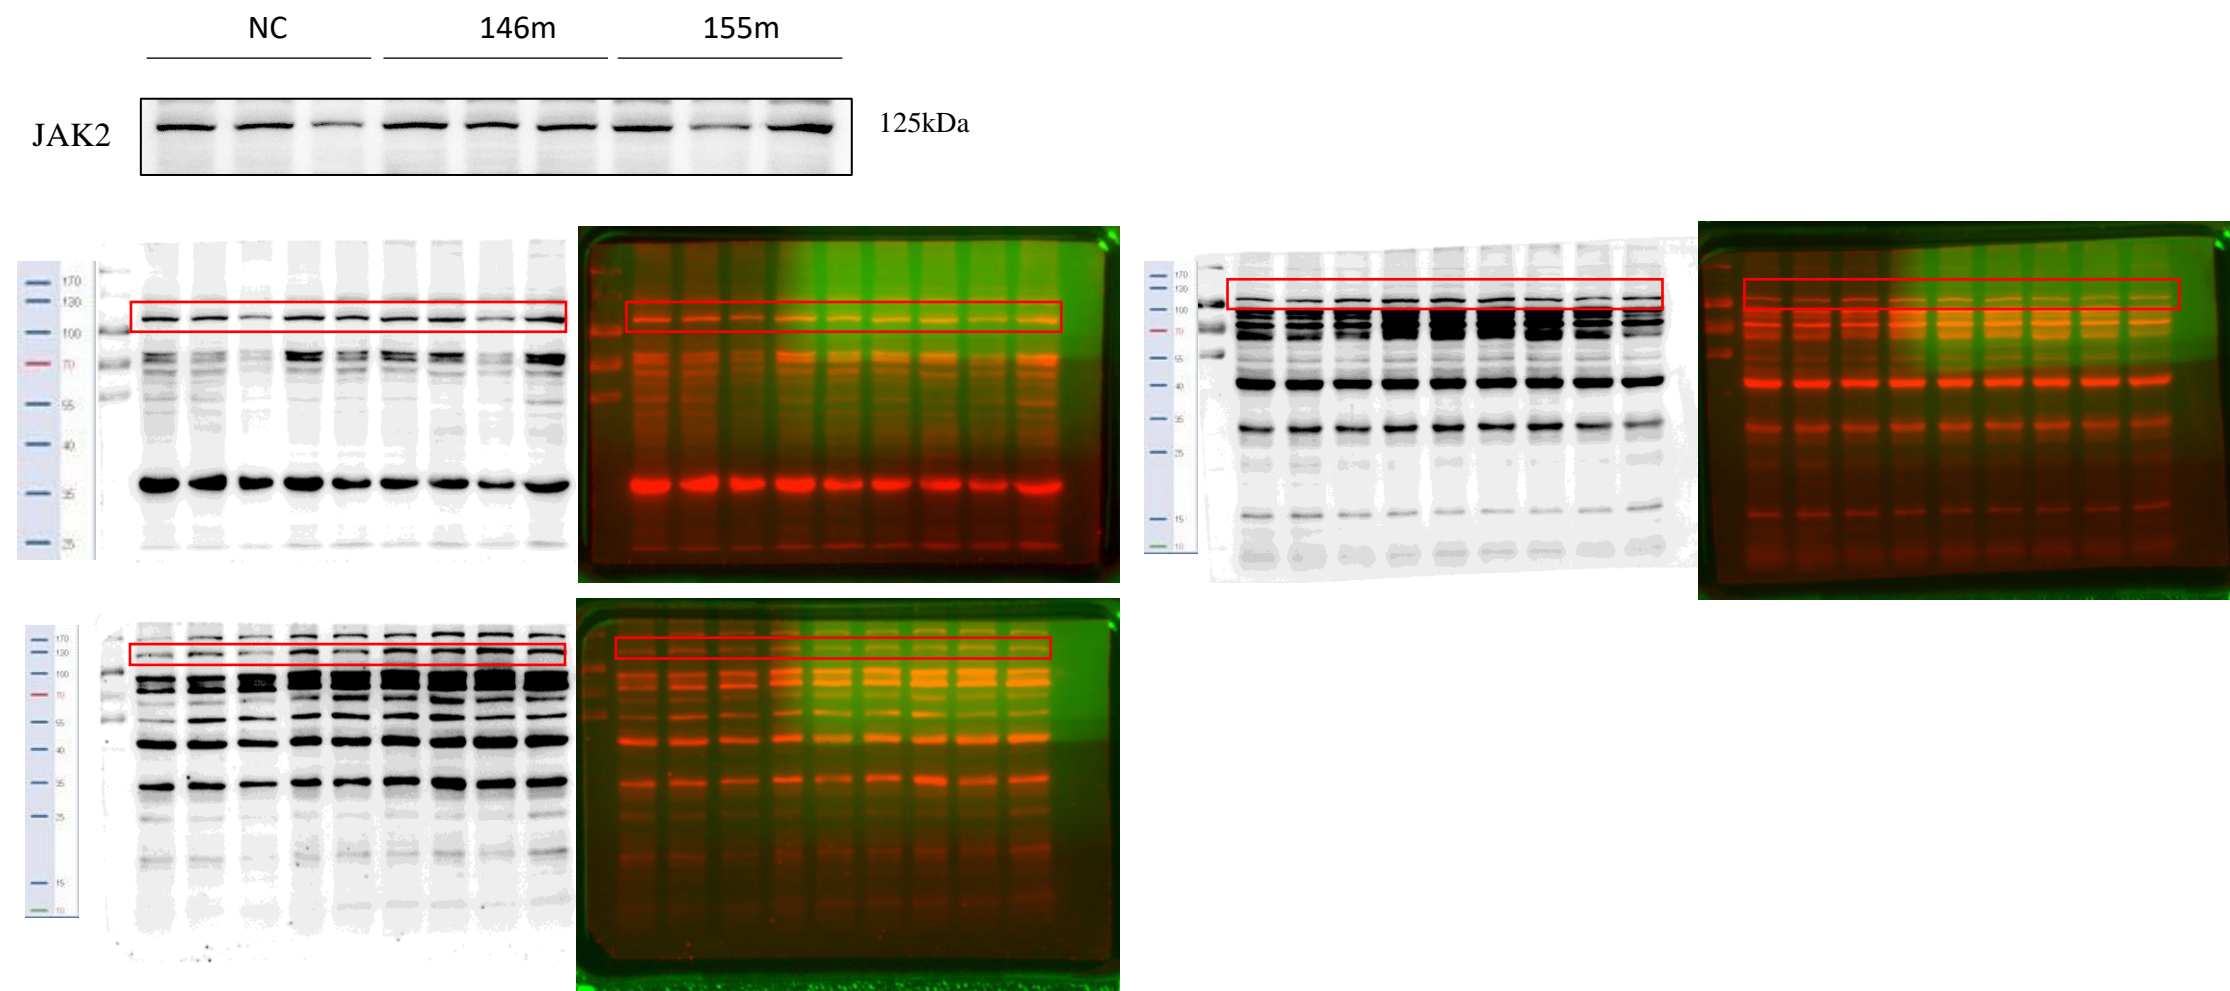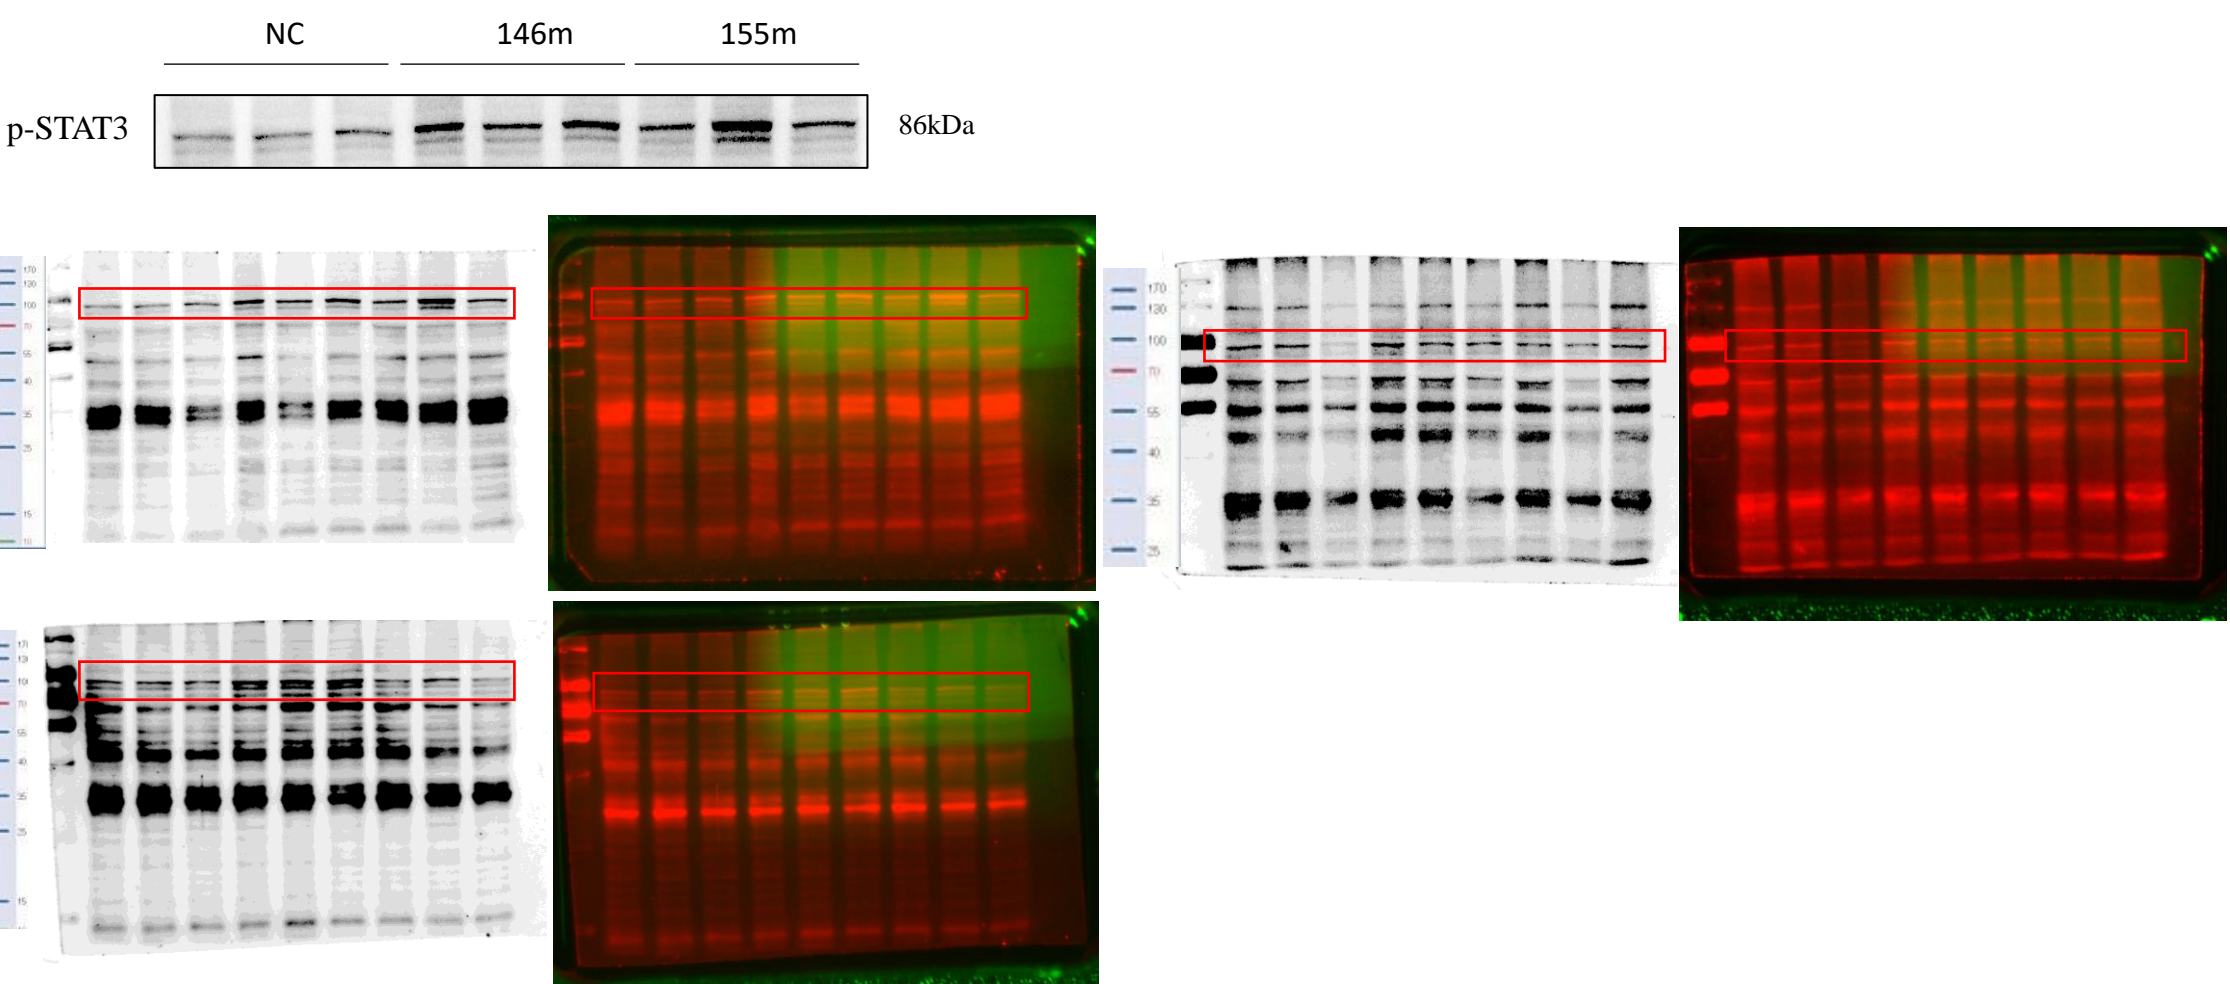



Figure 7C

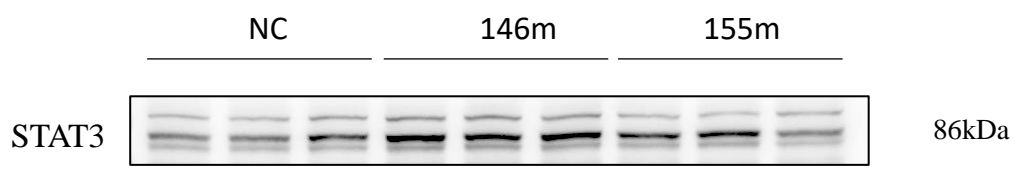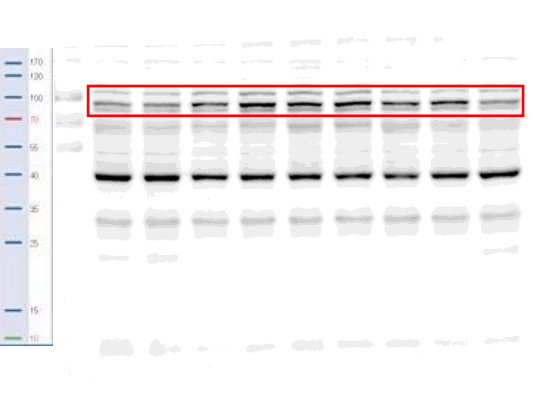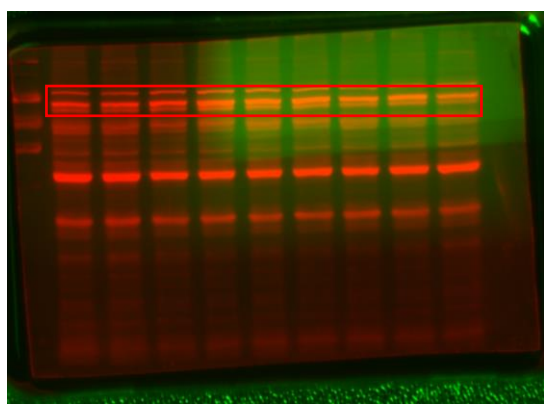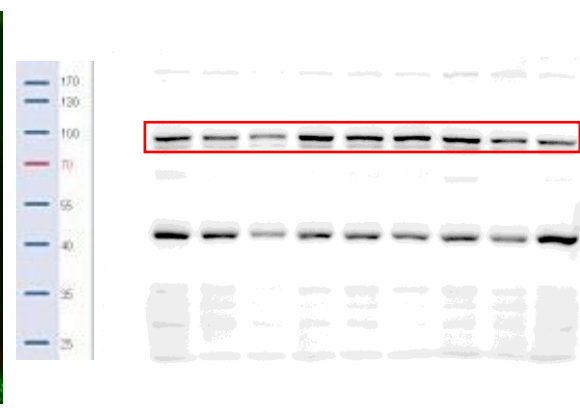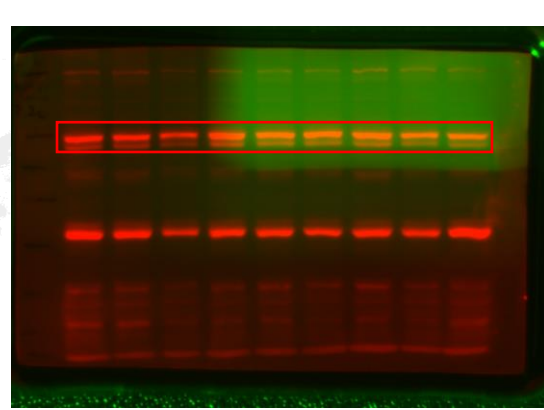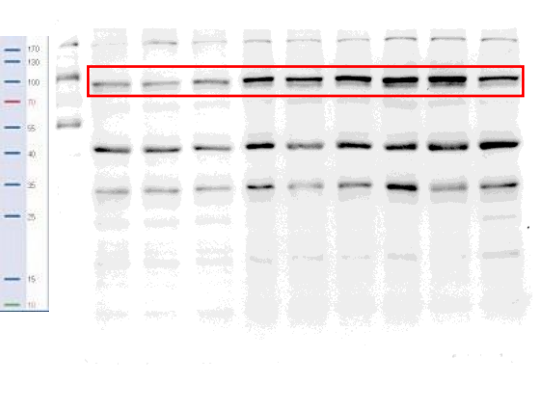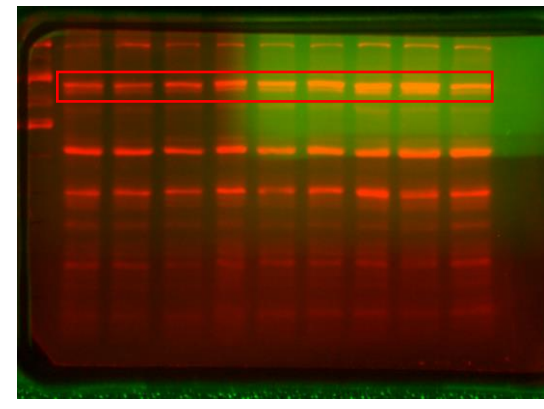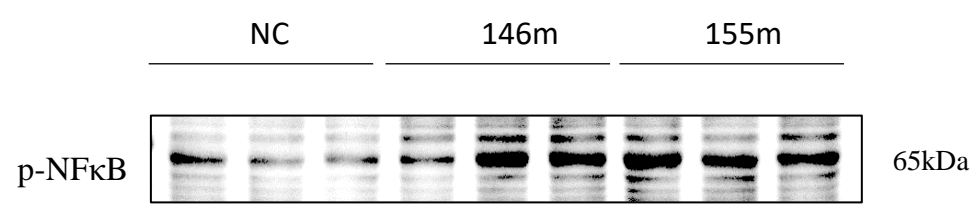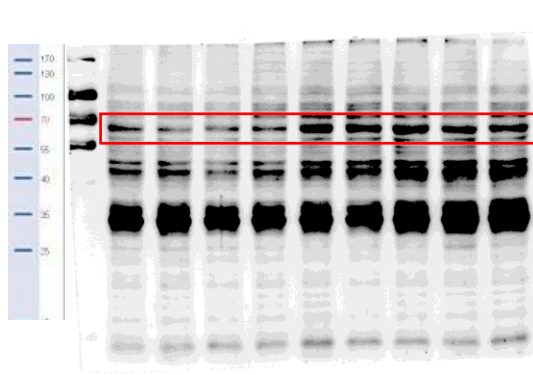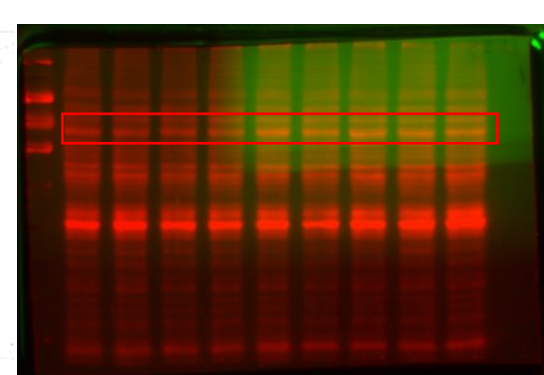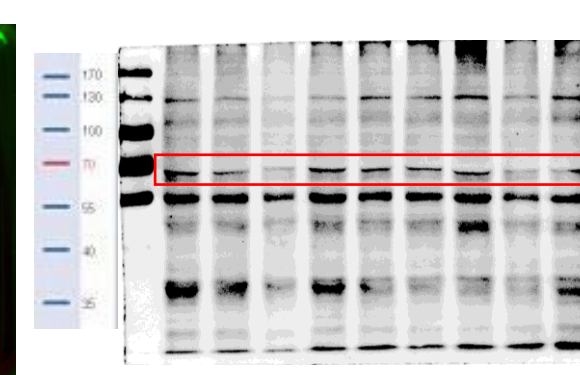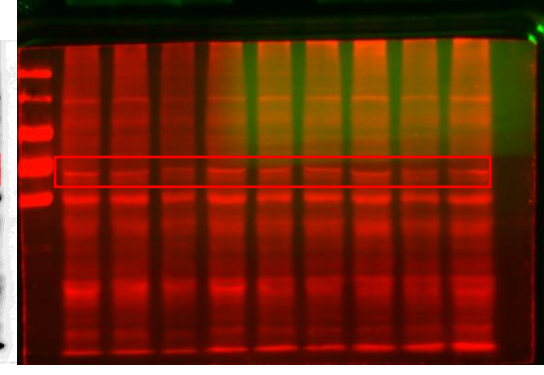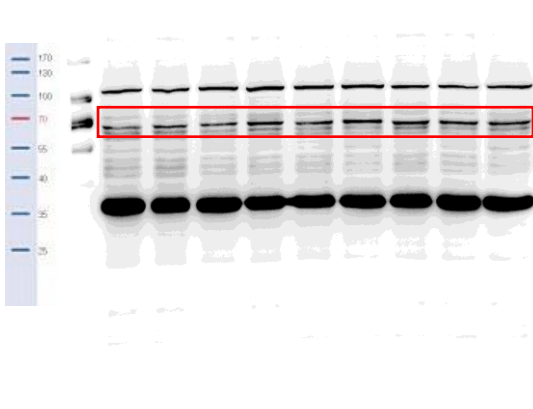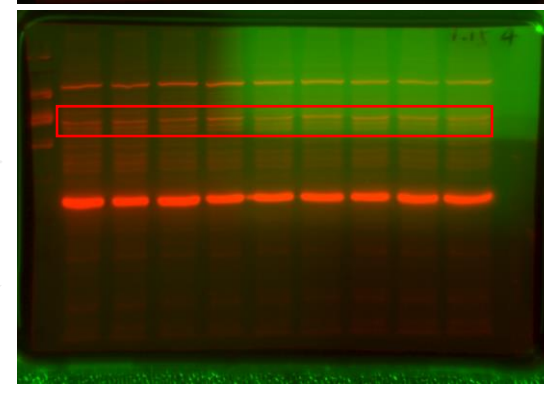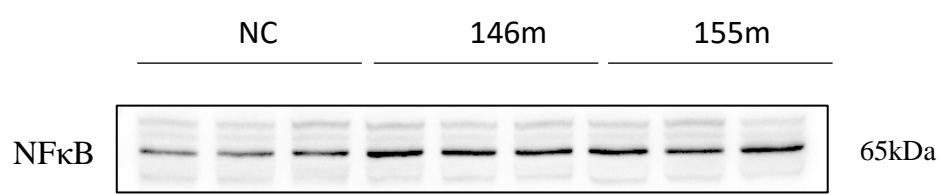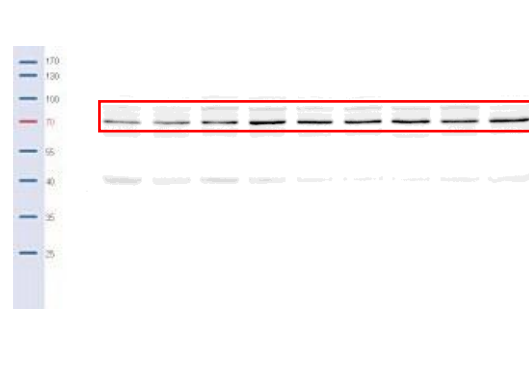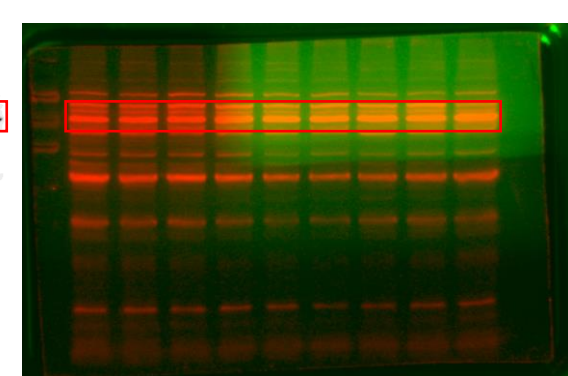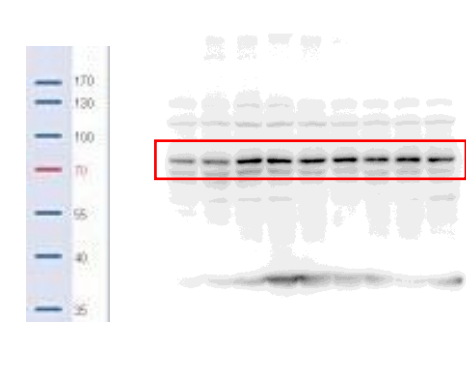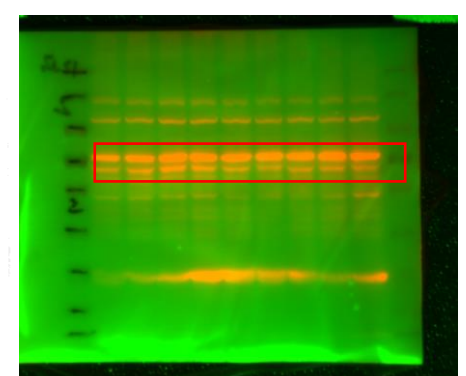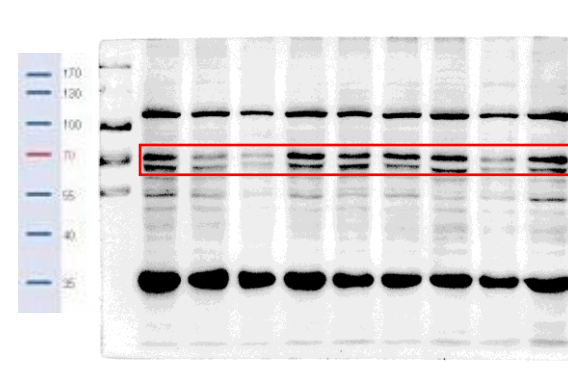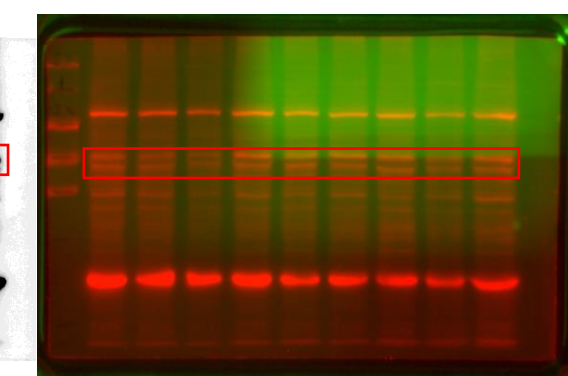



Figure 7C

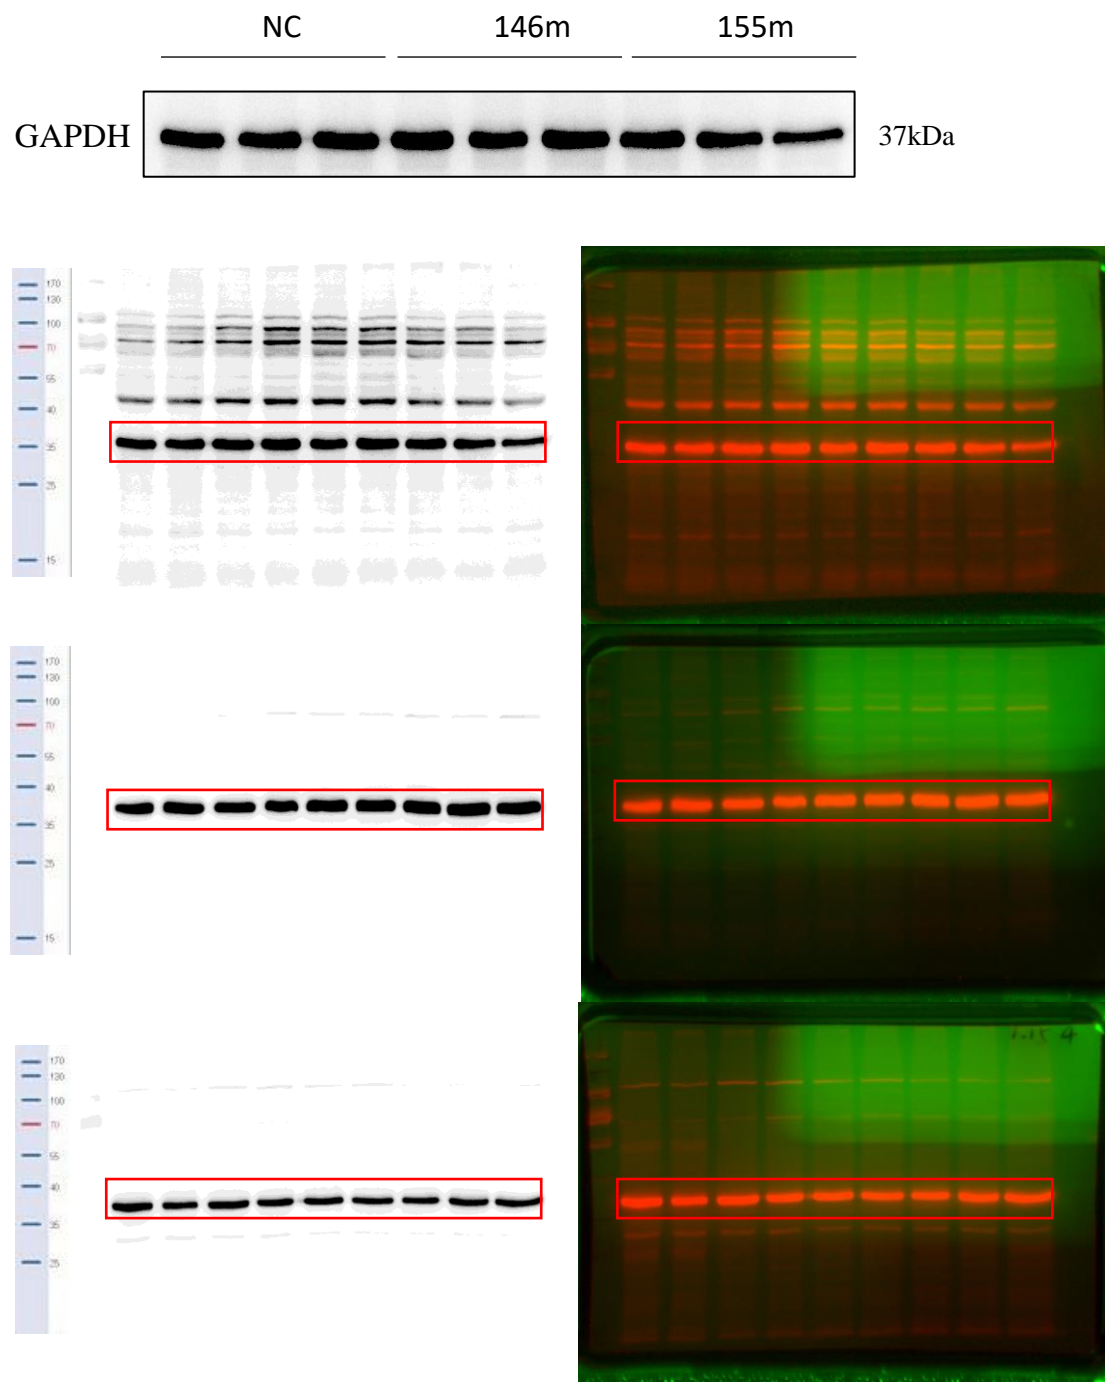



Figure 8C

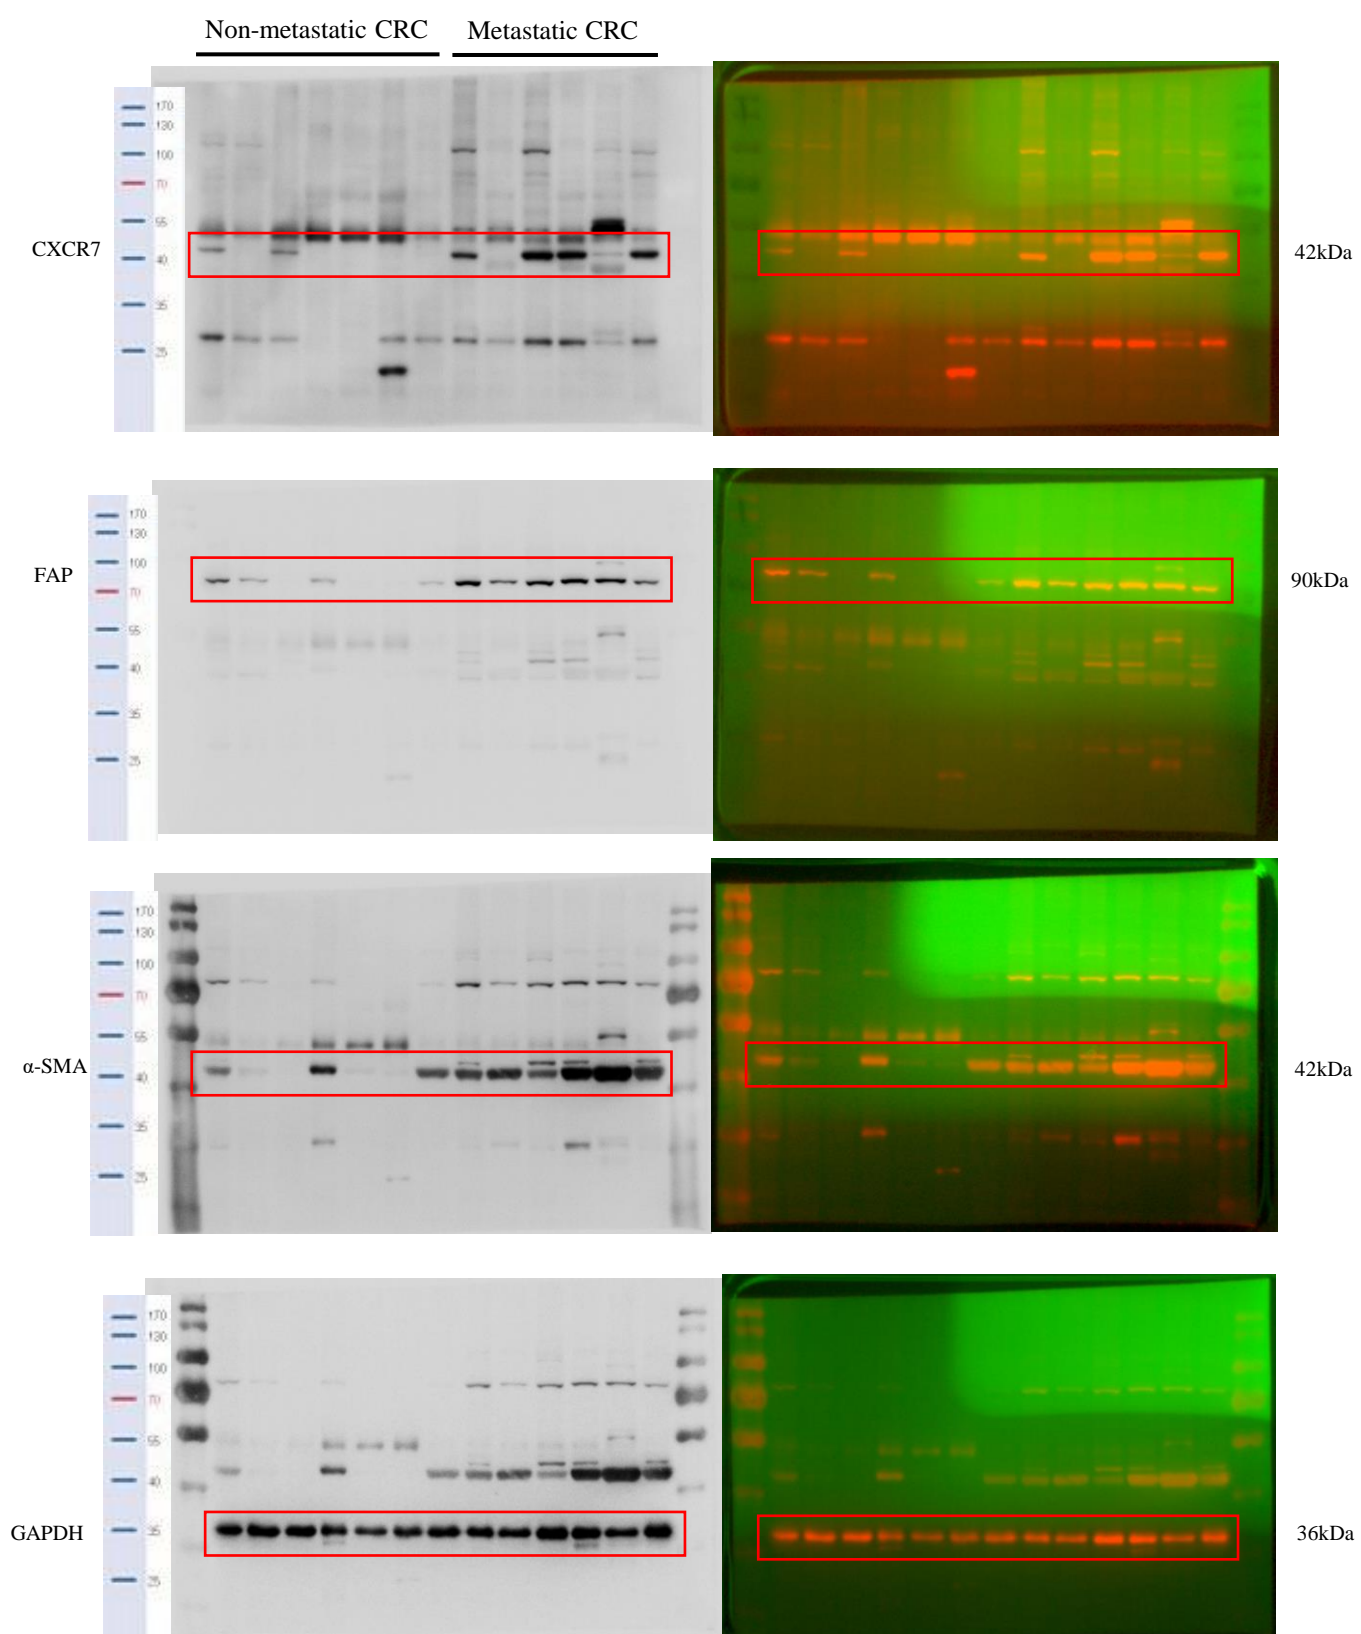



Fig. S5

SW620+MRC5 CM

NC  
146m+DMSO  
146m+JSH-23  
155m+DMSO  
155m+Stattic

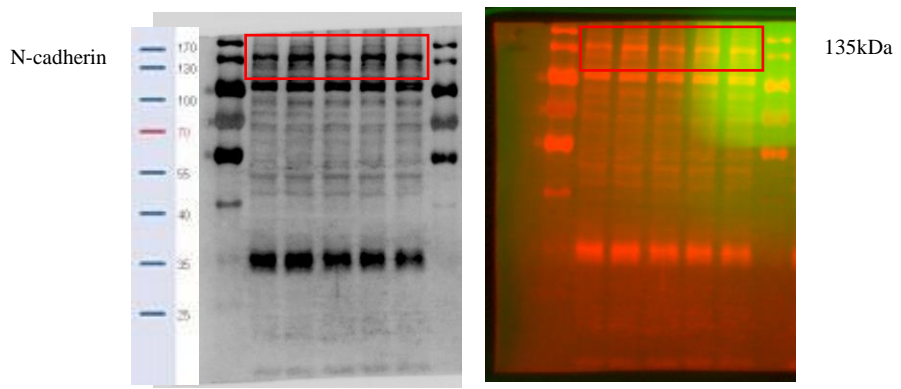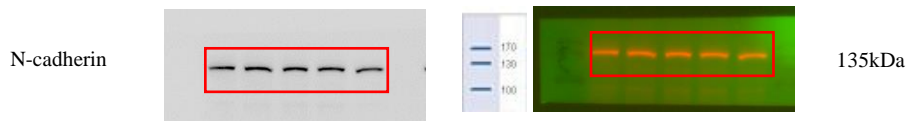

SW620+MRC5 CM

NC  
146m+DMSO  
146m+JSH-23  
155m+DMSO  
155m+Stattic

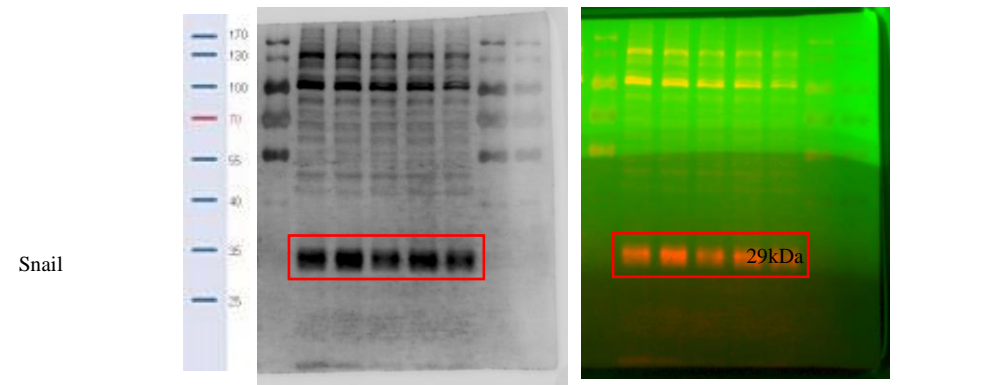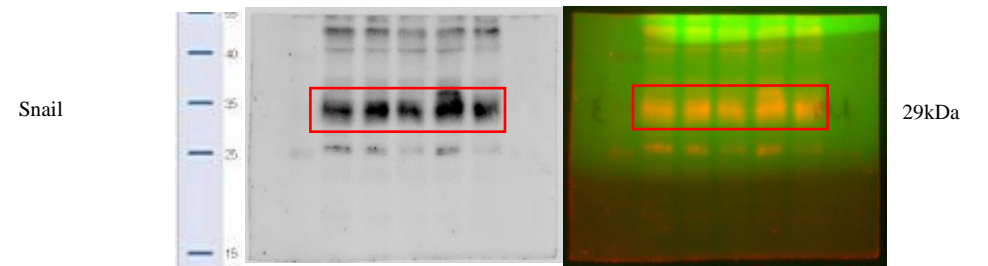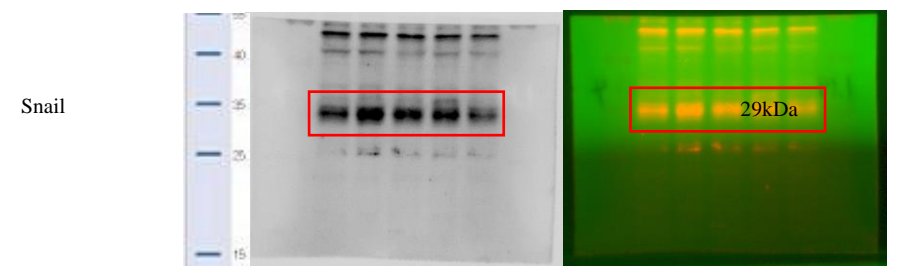

SW620+MRC5 CM

NC  
146m+DMSO  
146m+JSH-23  
155m+DMSO  
155m+Stattic

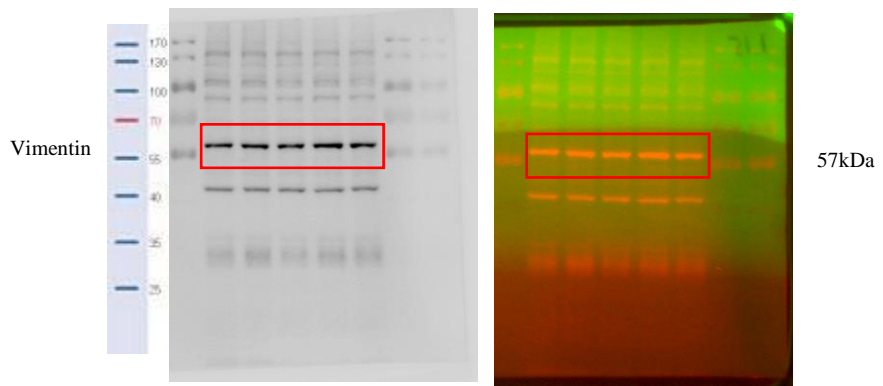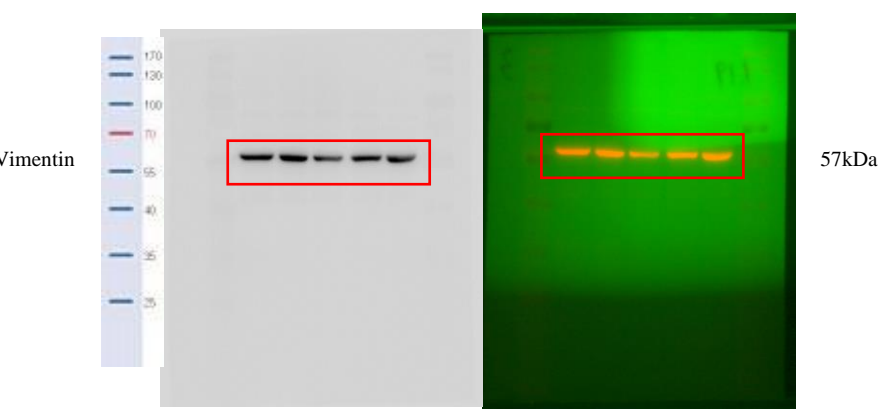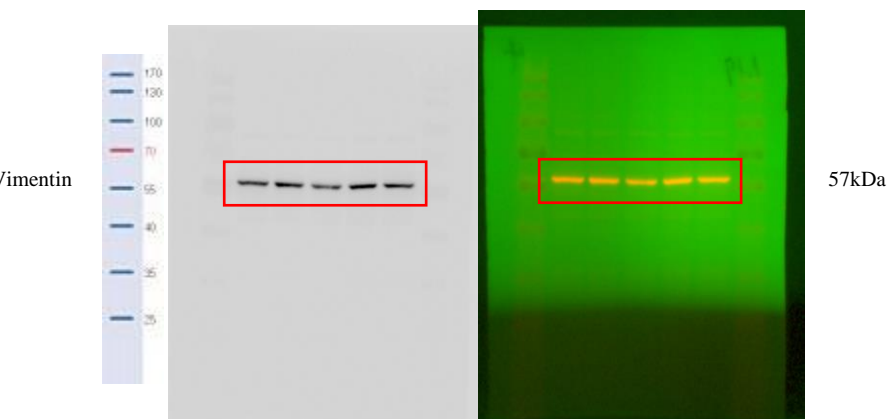

SW620+MRC5 CM

NC  
146m+DMSO  
146m+JSH-23  
155m+DMSO  
155m+Stattic

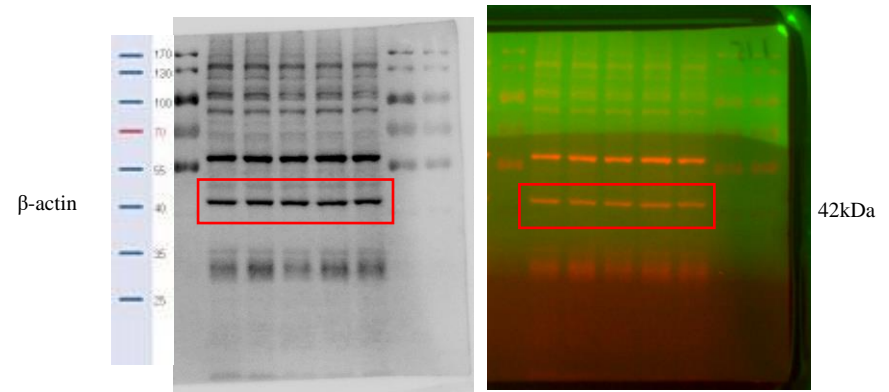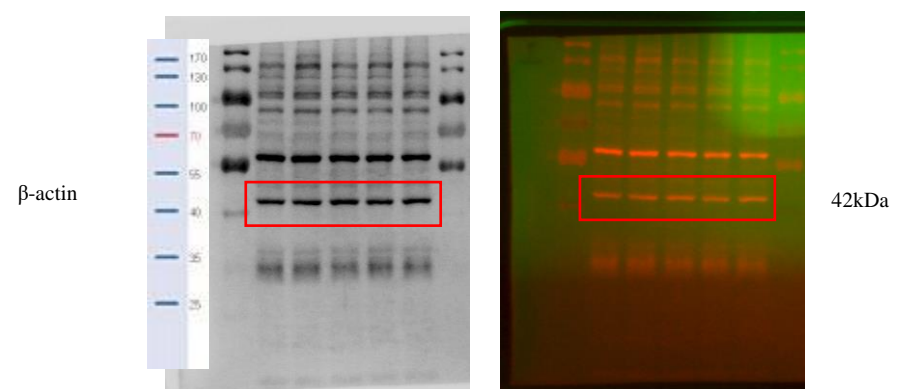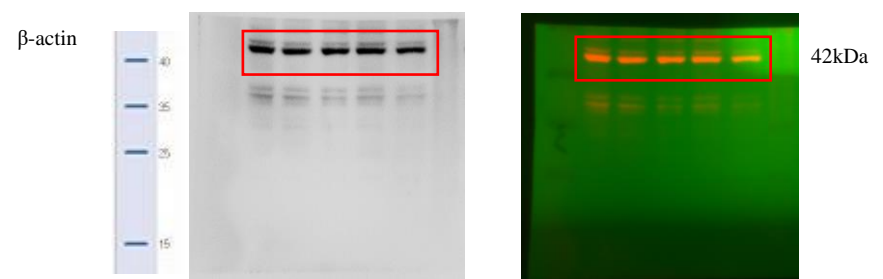

Supplement: 41419_2022_4825_MOESM7_ESM.pdf [file 41419_2022_4825_MOESM7_ESM.pdf]
