# Supplementary material for: Exosomal miR-146a-5p and miR-155-5p promote CXCL12/CXCR7-induced metastasis of colorectal cancer by crosstalk with cancer-associated fibroblasts
Source: PubMed Central journal article supplement (PMC9021302; doi:10.1038/s41419-022-04825-6), 2022-04-20

Fig. S1

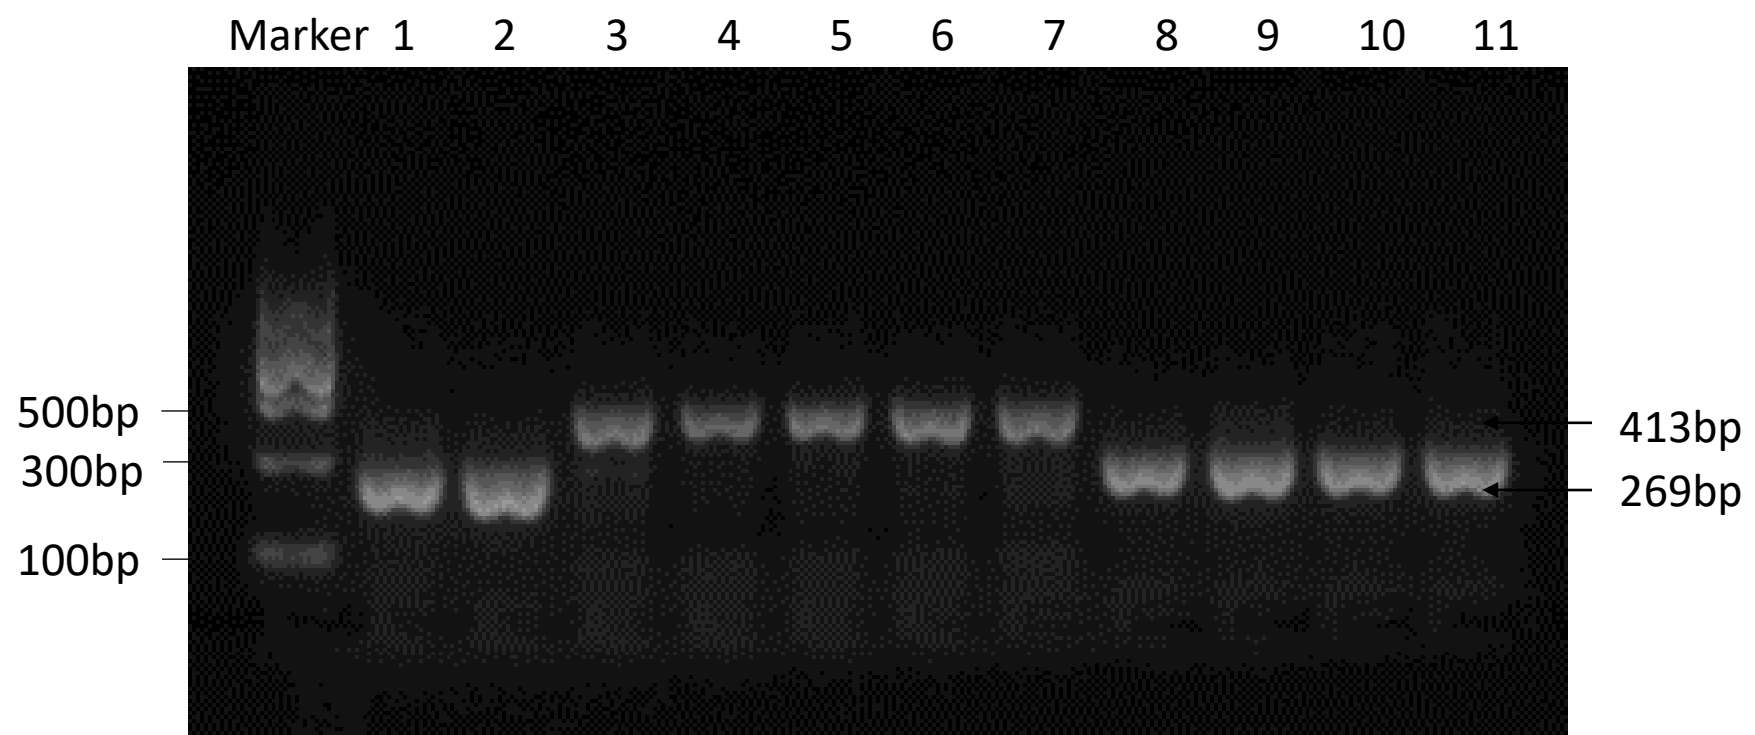

Fig. S2

A

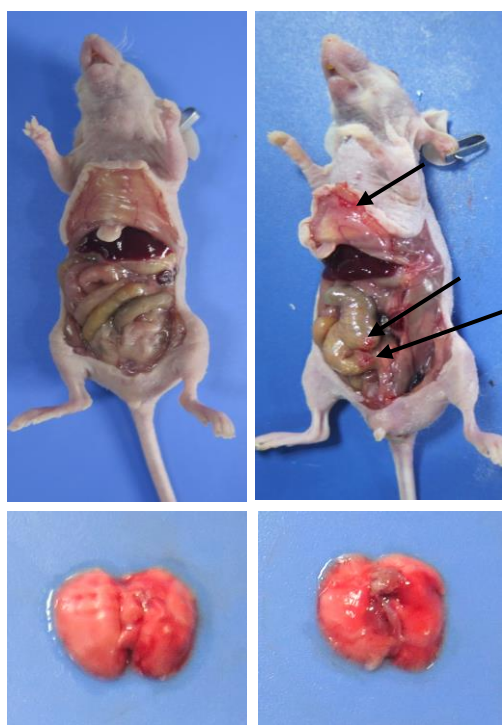

Con-luc

CXCR7-luc

B

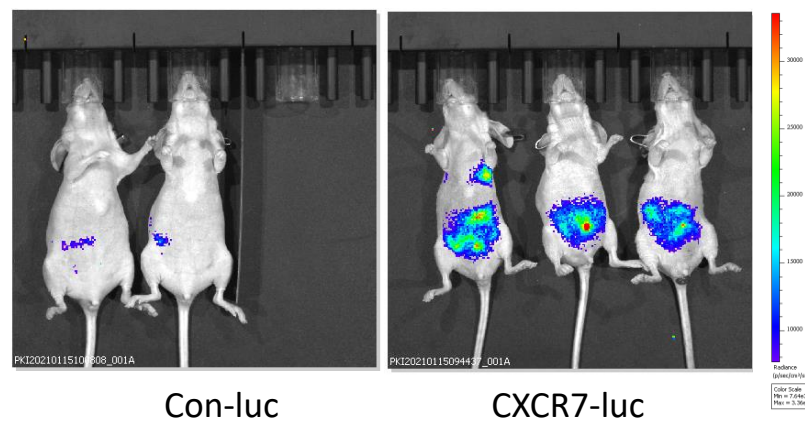

Con-luc

CXCR7-luc

C

CXCR7-luc

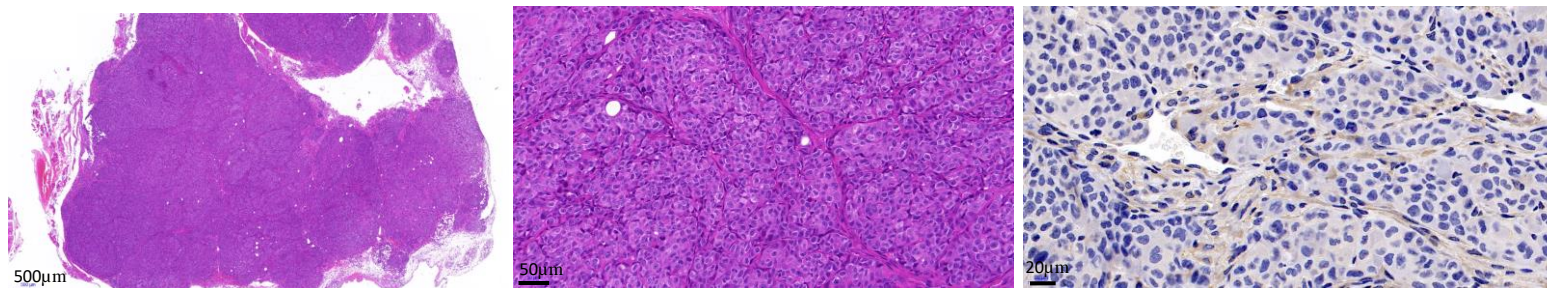

Fig. S3

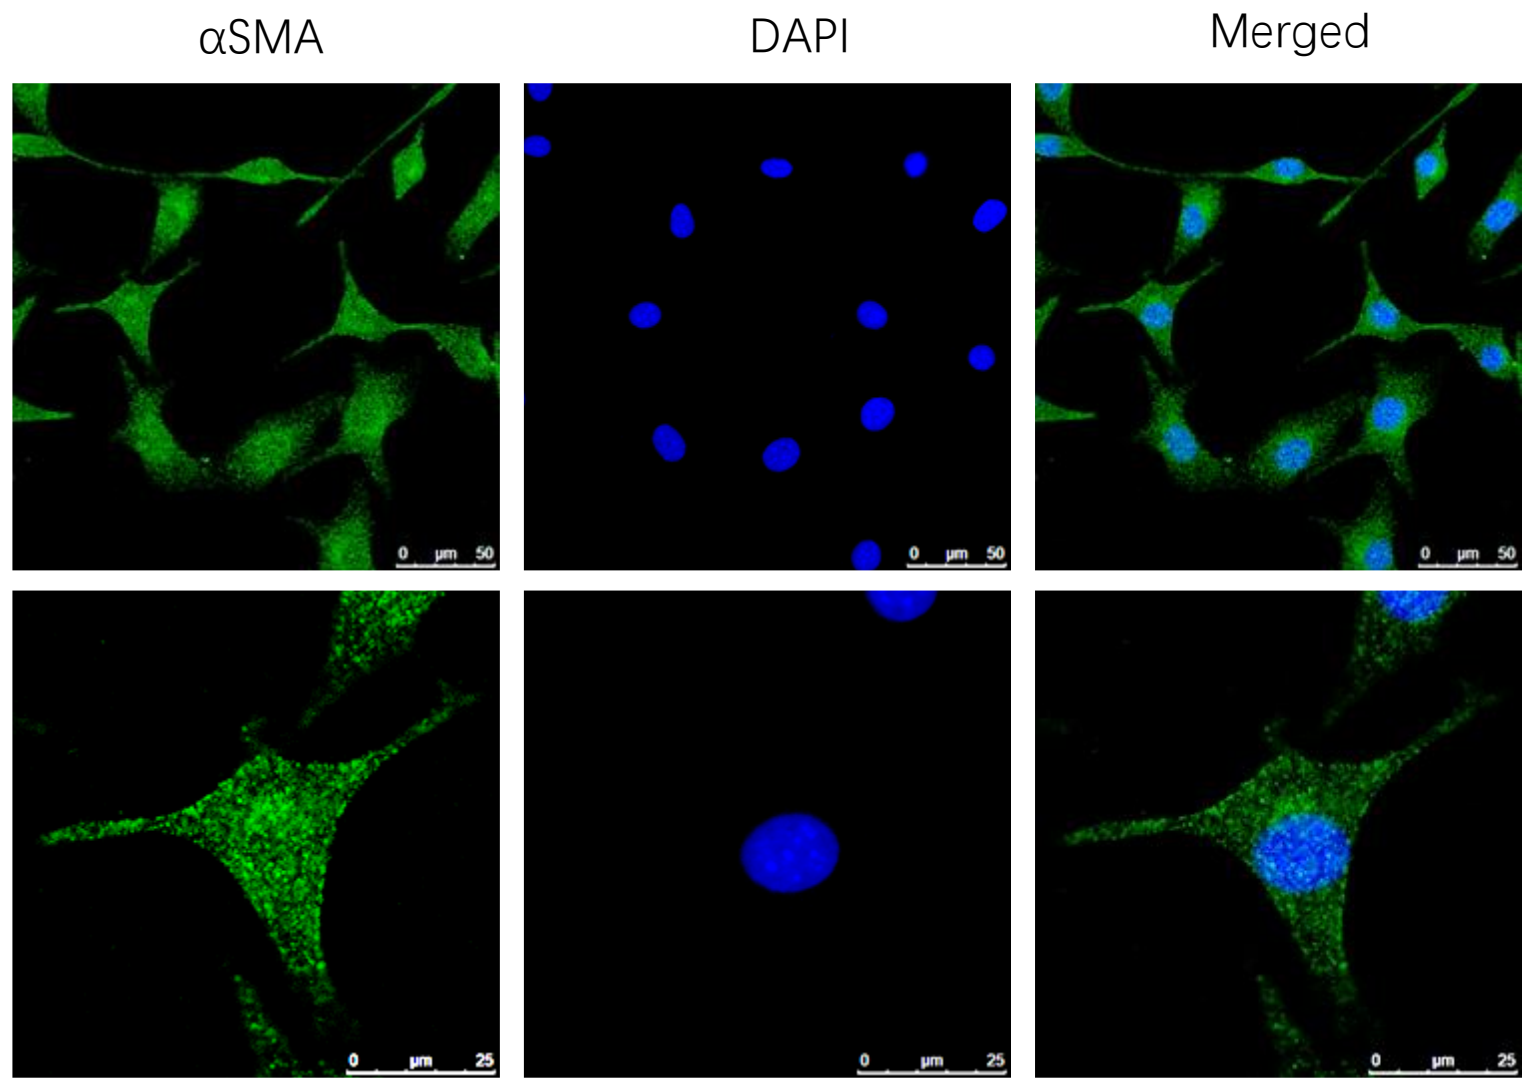

Fig. S4

A

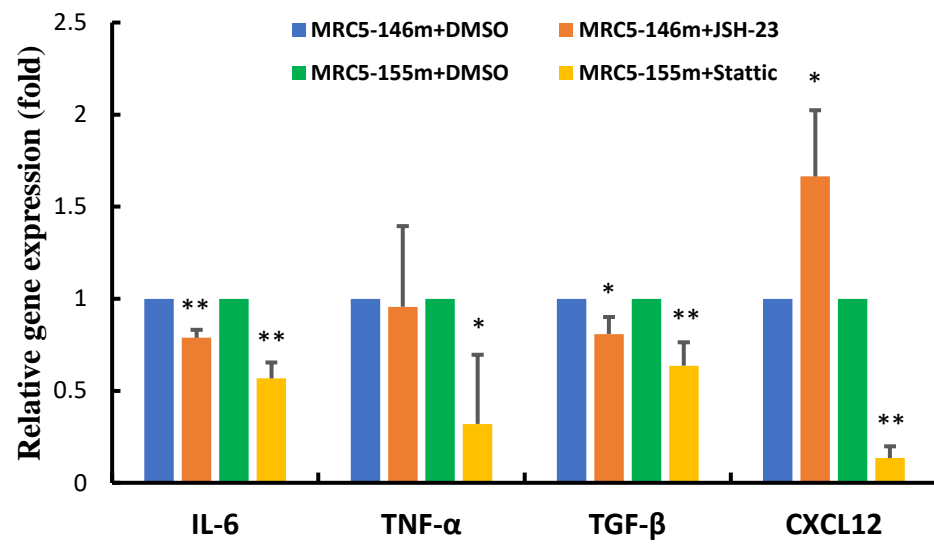

B

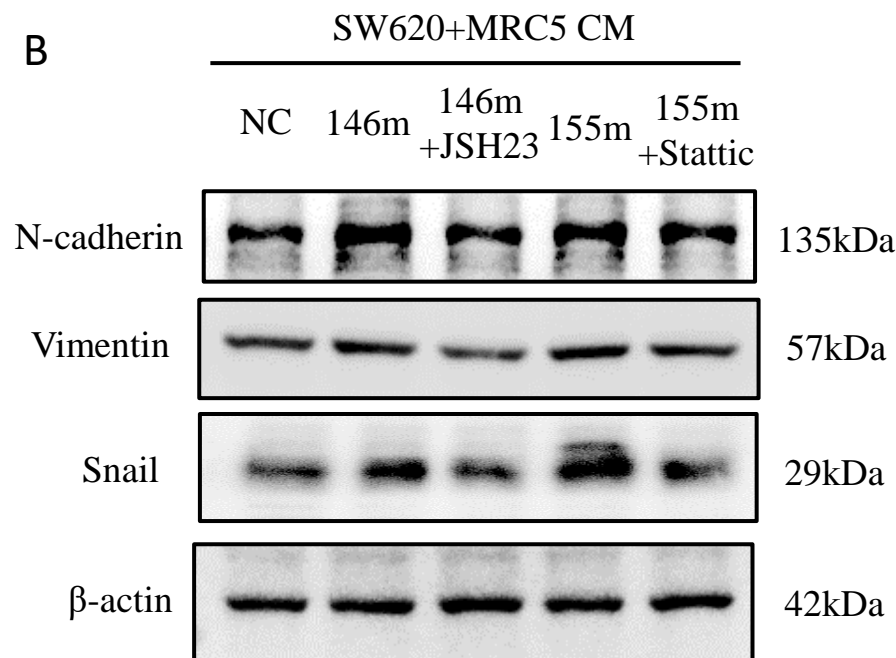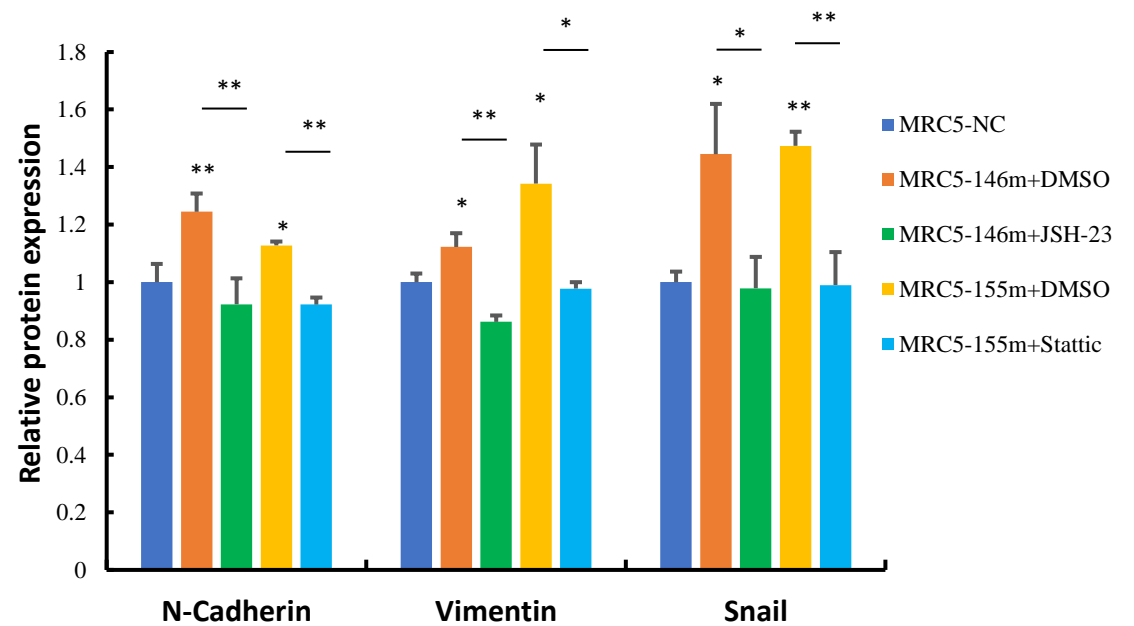

Supplement: 41419_2022_4825_MOESM1_ESM.pdf [file 41419_2022_4825_MOESM1_ESM.pdf]
